# Supplementary material
Source: publisher figshare collection journal article supplement (https://acs.figshare.com/ndownloader/files/4493830)

## Supporting Information

### Heteroaryl Cross Coupling as an Entry Towards the Synthesis of Lavendamycin Analogues: A Model Study

Guido Verniest<sup>¶‡</sup>, Xingpo Wang<sup>†</sup>, Norbert De Kimpe<sup>¶</sup> and Albert Padwa<sup>\*†</sup>

<sup>†</sup>Department of Organic Chemistry, Emory University, Atlanta, Georgia 30322

<sup>¶</sup>Department of Organic Chemistry, Faculty of Bioscience Engineering, Ghent University,  
Coupure Links 653, B-9000 Gent, Belgium

#### Table of Contents

|         |                                                                             |
|---------|-----------------------------------------------------------------------------|
| Page 3  | Preparation of 2-tri- <i>n</i> -butylstannylpyridine ( <b>11</b> )          |
| Page 3  | Preparation of 2-tri- <i>n</i> -butylstannyl-5-methylpyridine ( <b>12</b> ) |
| Page 3  | Preparation of [2,2']-bipyridinyl ( <b>13</b> )                             |
| Page 4  | Preparation of 5-methyl-[2,2']bipyridinyl ( <b>14</b> )                     |
| Page 4  | Preparation of 5,5'-dimethyl-[2,2']-bipyridinyl ( <b>15</b> )               |
| Page 5  | Preparation of 2-bromoquinolin-8-yl acetate ( <b>17</b> )                   |
| Page 5  | Preparation of 2-pyridin-2-ylquinoline ( <b>22</b> )                        |
| Page 6  | Preparation of 2-(5-methylpyridin-2-yl)quinoline ( <b>23</b> )              |
| Page 6  | Preparation of 1-pyridin-2-ylisoquinoline ( <b>24</b> )                     |
| Page 6  | Preparation of 2-tri- <i>n</i> -butylstannylquinoline ( <b>37</b> )         |
| Page 7  | Preparation of 2-isoquinolin-1-ylquinoline ( <b>38</b> )                    |
| Page 7  | Preparation of [2,2']-biquinoliny ( <b>39</b> )                             |
| Page 8  | References                                                                  |
| Page 9  | <sup>1</sup> H-NMR (400 MHz, CDCl <sub>3</sub> ) of compound <b>19</b>      |
| Page 10 | <sup>13</sup> C-NMR (100 MHz, CDCl <sub>3</sub> ) of compound <b>19</b>     |
| Page 11 | <sup>1</sup> H-NMR (400 MHz, CDCl <sub>3</sub> ) of compound <b>25</b>      |
| Page 12 | <sup>13</sup> C-NMR (100 MHz, CDCl <sub>3</sub> ) of compound <b>25</b>     |
| Page 13 | <sup>1</sup> H-NMR (400 MHz, CDCl <sub>3</sub> ) of compound <b>26</b>      |
| Page 14 | <sup>13</sup> C-NMR (100 MHz, CDCl <sub>3</sub> ) of compound <b>26</b>     |
| Page 15 | <sup>1</sup> H-NMR (400 MHz, CDCl <sub>3</sub> ) of compound <b>27</b>      |
| Page 16 | <sup>13</sup> C-NMR (100 MHz, CDCl <sub>3</sub> ) of compound <b>27</b>     |
| Page 17 | <sup>1</sup> H-NMR (400 MHz, CDCl <sub>3</sub> ) of compound <b>28</b>      |
| Page 18 | <sup>13</sup> C-NMR (100 MHz, CDCl <sub>3</sub> ) of compound <b>28</b>     |
| Page 19 | <sup>1</sup> H-NMR (400 MHz, CDCl <sub>3</sub> ) of compound <b>29</b>      |
| Page 20 | <sup>13</sup> C-NMR (100 MHz, CDCl <sub>3</sub> ) of compound <b>29</b>     |
| Page 21 | <sup>1</sup> H-NMR (400 MHz, CDCl <sub>3</sub> ) of compound <b>30</b>      |
| Page 22 | <sup>13</sup> C-NMR (100 MHz, CDCl <sub>3</sub> ) of compound <b>30</b>     |
| Page 23 | <sup>1</sup> H-NMR (400 MHz, CDCl <sub>3</sub> ) of compound <b>31</b>      |

|         |                                                                           |
|---------|---------------------------------------------------------------------------|
| Page 24 | <sup>13</sup> C-NMR (100 MHz, CDCl <sub>3</sub> ) of compound <b>31</b>   |
| Page 25 | <sup>1</sup> H-NMR (400 MHz, CDCl <sub>3</sub> ) of compound <b>34</b>    |
| Page 26 | <sup>13</sup> C-NMR (100 MHz, CDCl <sub>3</sub> ) of compound <b>34</b>   |
| Page 27 | <sup>1</sup> H-NMR (400 MHz, CDCl <sub>3</sub> ) of compound <b>35</b>    |
| Page 28 | <sup>13</sup> C-NMR (100 MHz, CDCl <sub>3</sub> ) of compound <b>35</b>   |
| Page 29 | <sup>1</sup> H-NMR (400 MHz, CDCl <sub>3</sub> ) of compound <b>36</b>    |
| Page 30 | <sup>13</sup> C-NMR (100 MHz, CDCl <sub>3</sub> ) of compound <b>36</b>   |
| Page 31 | <sup>1</sup> H-NMR (400 MHz, CDCl <sub>3</sub> ) of compound <b>40</b>    |
| Page 32 | <sup>13</sup> C-NMR (100 MHz, CDCl <sub>3</sub> ) of compound <b>40</b>   |
| Page 33 | <sup>1</sup> H-NMR (400 MHz, CDCl <sub>3</sub> ) of compound <b>41</b>    |
| Page 34 | <sup>13</sup> C-NMR (100 MHz, CDCl <sub>3</sub> ) of compound <b>41</b>   |
| Page 35 | <sup>1</sup> H-NMR (400 MHz, DMSO-d <sub>6</sub> ) of compound <b>42</b>  |
| Page 36 | <sup>13</sup> C-NMR (100 MHz, CDCl <sub>3</sub> ) of compound <b>42</b>   |
| Page 37 | <sup>1</sup> H-NMR (400 MHz, CDCl <sub>3</sub> ) of compound <b>43</b>    |
| Page 38 | <sup>13</sup> C-NMR (100 MHz, CDCl <sub>3</sub> ) of compound <b>43</b>   |
| Page 39 | <sup>1</sup> H-NMR (400 MHz, CDCl <sub>3</sub> ) of compound <b>44</b>    |
| Page 40 | <sup>13</sup> C-NMR (100 MHz, CDCl <sub>3</sub> ) of compound <b>44</b>   |
| Page 41 | <sup>1</sup> H-NMR (400 MHz, CDCl <sub>3</sub> ) of compound <b>45</b>    |
| Page 42 | <sup>13</sup> C-NMR (100 MHz, CDCl <sub>3</sub> ) of compound <b>45</b>   |
| Page 43 | <sup>1</sup> H-NMR (400 MHz, DMSO-d <sub>6</sub> ) of compound <b>46</b>  |
| Page 44 | <sup>13</sup> C-NMR (100 MHz, DMSO-d <sub>6</sub> ) of compound <b>46</b> |
| Page 45 | <sup>1</sup> H-NMR (400 MHz, DMSO-d <sub>6</sub> ) of compound <b>47</b>  |
| Page 46 | <sup>13</sup> C-NMR (100 MHz, DMSO-d <sub>6</sub> ) of compound <b>47</b> |
| Page 47 | <sup>1</sup> H-NMR (400 MHz, DMSO-d <sub>6</sub> ) of compound <b>50</b>  |
| Page 48 | <sup>13</sup> C-NMR (100 MHz, DMSO-d <sub>6</sub> ) of compound <b>50</b> |
| Page 49 | <sup>1</sup> H-NMR (400 MHz, CDCl <sub>3</sub> ) of compound <b>51</b>    |
| Page 50 | <sup>13</sup> C-NMR (100 MHz, CDCl <sub>3</sub> ) of compound <b>51</b>   |

**Preparation of 2-Tri-*n*-butylstannylpyridine (11).** A sample of 2-bromopyridine (**9a**) (2.1 mL, 22 mmol) was dissolved in dry THF (10 mL) and the solution was cooled to -78 °C under an argon atmosphere. To this mixture was added 9.7 mL of a 2.5 M *n*-butyllithium solution in hexane (24.2 mmol) dropwise. After stirring for 1 h at -78 °C, tri-*n*-butyltin chloride (6.0 mL, 22 mmol) was added dropwise and the solution was allowed to stir overnight. After removal of the solvent under reduced pressure, the residue was taken up in ethyl acetate (50 mL) and water (20 mL). The combined organic layer was washed with brine and dried over Na<sub>2</sub>SO<sub>4</sub>. The solution was concentrated under reduced pressure to give 7.14 g (88% yield) of 2-tri-*n*-butylstannylpyridine (**11**)<sup>1</sup>; <sup>1</sup>H-NMR (400 MHz, CDCl<sub>3</sub>) δ 0.86 (t, 9H, J = 7.2 Hz), 1.10 (t, 6H, J = 8.4 Hz), 1.30 (m, 6H), 1.54 (m, 6H), 7.10 (m, 1H), 7.40 (d, 1H, J = 1.2 Hz), 7.44 (m, 1H) and 8.66 (d, 1H, J = 1.2 Hz).

**Preparation of 2-Tri-*n*-butylstannyl-5-methylpyridine (12).** A sample of 2-bromo-5-methylpyridine (**10a**) (1.72 g, 10 mmol) was taken up in dry THF (10 mL) and the solution was cooled to -78 °C under an argon atmosphere. To this mixture was added 4.5 mL of a 2.5 M *n*-butyllithium solution in hexane (11 mmol) dropwise. After stirring the mixture for 1 h at -78 °C, tri-*n*-butyltin chloride (3 mL, 11 mmol) was added dropwise and the solution was stirred overnight at 25 °C. The solvent was removed under reduced pressure and the residue was taken up in ethyl acetate (50 mL) and water (20 mL). The combined organic layer was washed with brine, dried over Na<sub>2</sub>SO<sub>4</sub>, filtered, and concentrated under reduced pressure to give 3.17 g (83%) of 2-tri-*n*-butylstannyl-5-methylpyridine (**12**)<sup>1</sup>; <sup>1</sup>H-NMR (400 MHz, CDCl<sub>3</sub>) δ 0.89 (m, 9H), 1.10 (m, 6H), 1.30 (m, 6H), 1.45 (m, 6H), 2.27 (s, 3 H), 7.29 (t, 2H, J = 1.2 Hz) and 8.58 (s, 1H).

**Preparation of [2,2']-Bipyridinyl (13).** To a solution of 2-bromopyridine (0.16 g, 1 mmol) in 1 mL of dry degassed DMF was added 2-tri-*n*-butylstannylpyridine (**11**) (0.37 g, 1 mmol) and dichlorobis(triphenylphosphine)palladium(II) (70 mg, 0.1 mmol) under an argon atmosphere and the mixture was heated at 110 °C for 18 h, cooled to rt, water was added and the mixture was extracted with diethyl ether. The combined

organic layers were washed with water, brine and dried over Na<sub>2</sub>SO<sub>4</sub>. The organic extracts were filtered and concentrated under reduced pressure. The crude residue was subjected to flash silica gel chromatography to give 0.12 g (78%) of [2,2']bipyridinyl (**13**); mp 70-72 °C (lit.<sup>2</sup> mp 72-73 °C); <sup>1</sup>H-NMR (400 MHz, CDCl<sub>3</sub>) δ 7.30 (m, 2H), 7.80 (m, 2H), 8.38 (m, 2H) and 8.67 (m, 2H).

**Preparation of 5-Methyl-[2,2']bipyridinyl (**14**).** To a solution of 2-bromopyridine (**9a**) (0.16 g, 1 mmol) in 1 mL of dry degassed DMF was added 2-tri-*n*-butylstannyl-5-methylpyridine (**12**) (0.38 g, 1 mmol) and dichlorobis(triphenylphosphine)palladium(II) (70 mg, 0.1 mmol) under an argon atmosphere. The mixture was heated at 110 °C for 18 h, cooled to rt, water was added and the mixture was extracted with ether. The combined organic layer was washed with water, brine and dried over Na<sub>2</sub>SO<sub>4</sub>. The organic extracts were filtered and concentrated under reduced pressure. The crude residue was subjected to flash silica gel chromatography to give 0.11 g (66%) of 5-methyl-[2,2']bipyridinyl (**14**)<sup>3</sup> as a pale yellow oil; <sup>1</sup>H-NMR (400 MHz, CDCl<sub>3</sub>) δ 2.37 (s, 3H), 7.28 (m, 1H), 7.60 (m, 1H), 7.78 (m, 1H), 8.27 (q, 1H, J = 8.4 Hz), 8.36 (m, 1H), 8.48 (m, 1H), and 8.65 (m, 1H).

5-Methyl-[2,2']bipyridinyl (**14**) could also be prepared by coupling 2-bromo-5-methylpyridine (**10a**) with 2-tri-*n*-butylstannylpyridine (**11**). To a solution of **10a** (0.17 g, 1 mmol) in 1 mL of dry degassed DMF was added a sample of **11** (0.37 g, 1 mmol) and dichlorobis(triphenylphosphine)palladium(II) (70 mg, 0.1 mmol) under an argon atmosphere. The mixture was heated at 110 °C for 18 h, cooled to rt, water was added and the mixture was extracted with diethyl ether. The combined organic layer was washed with water, brine and dried over Na<sub>2</sub>SO<sub>4</sub>. The organic extracts were filtered and concentrated under reduced pressure. The crude residue was subjected to flash silica gel chromatography to give 0.1 g (59%) of 5-methyl-[2,2']bipyridinyl (**14**).

**Preparation of 5,5'-Dimethyl-[2,2']bipyridinyl (**15**).** To a solution of 2-bromo-5-methylpyridine (**10a**) (0.17 g, 1 mmol) in 1 mL of dry degassed DMF was added 2-tri-*n*-butylstannyl-5-methylpyridine (**12**) (0.38 g, 1 mmol) and dichlorobis(triphenylphosphine)palladium(II) (70 mg, 0.1 mmol) under an argon atmosphere. The mixture

was heated at 110 °C for 18 h, cooled to rt, water was added and the mixture was extracted with diethyl ether. The combined organic layer was washed with water, brine and dried over Na<sub>2</sub>SO<sub>4</sub>. The organic extracts were filtered and the solution was concentrated under reduced pressure. The crude residue was subjected to flash silica gel chromatography to give 0.11 g (61%) of the titled compound **15** as a white solid, mp 113-114 °C (lit.<sup>4</sup> mp 114-115 °C); <sup>1</sup>H-NMR (400 MHz, CDCl<sub>3</sub>) δ 2.37 (s, 6H) , 7.61 (dd, 2H, J = 8.4 and 2.0 Hz), 8.24 (d, 2H, J = 8.0 Hz) and 8.48 (d, 2H, J = 1.6 Hz).

**Preparation of 2-Bromo-8-acetoxyquinoline (17).** A solution of 1.0 g (6.2 mmol) 2,8-dihydroxyquinoline (**16**)<sup>5</sup> in 5 mL of acetic anhydride was heated to reflux overnight and then the solution was concentrated under reduced pressure to afford 8-acetoxy-2-hydroxyquinoline<sup>5</sup> in 99% yield which was used directly in the next step without purification. To a suspension of 1.16 g (5.7 mmol) of 8-acetoxy-2-hydroxyquinoline in 5 mL of dry CHCl<sub>3</sub> was added 4.0 g (14.0 mmol) of POBr<sub>3</sub> and the reaction mixture was heated at reflux for 5 h under a nitrogen atmosphere. After pouring the reaction mixture over ice followed by extraction with CHCl<sub>3</sub>, the organic extracts were dried over MgSO<sub>4</sub>/K<sub>2</sub>CO<sub>3</sub> (10:1), filtered and concentrated under reduced pressure to give 1.02 g (67%) of 2-bromo-8-acetoxyquinoline (**17**) whose spectral properties were identical to those recorded in the literature.<sup>6</sup>

**Preparation of 2-(Pyridin-2-yl)quinoline (22).** To a solution of 2-bromoquinoline (**20a**) (0.1 g, 0.5 mmol) in 1 mL of dry degassed DMF was added 2-tri-*n*-butylstannylpyridine (**11**) (0.18 g, 0.5 mmol) and dichlorobis(triphenylphosphine)palladium(II) (35 mg, 0.05 mmol) under an argon atmosphere. The mixture was heated at 110 °C for 18 h, cooled to rt, water was added and the mixture was extracted with diethyl ether. The combined organic layer was washed with water, brine and dried over Na<sub>2</sub>SO<sub>4</sub>. The organic extracts were filtered and the solution was concentrated under reduced pressure. The crude residue was subjected to flash silica gel chromatography to give 0.07 g (71%) of the titled compound **22** as a white solid, mp 96-97 °C (lit.<sup>7</sup> mp 97-98 °C); <sup>1</sup>H-NMR (400 MHz, CDCl<sub>3</sub>) δ 7.35 (m, 1H), 7.55 (m, 1H), 7.73 (m, 1H), 7.86 (m,

2H), 8.18 (d, 1H,  $J = 8.4$  Hz), 8.29 (d, 1H,  $J = 8.8$  Hz), 8.57 (d, 1H,  $J = 8.8$  Hz), 8.66 (d, 1H,  $J = 8.0$  Hz) and 8.74 (m, 1H).

**Preparation of 2-(5-Methylpyridin-2-yl)quinoline (23).** To a solution of 2-bromoquinoline (**20a**) (0.1 g, 0.5 mmol) in 1 mL of dry degassed DMF was added 2-tri-*n*-butylstannyl-5-methylpyridine (**12**) (0.19 g, 0.5 mmol) and dichlorobis(triphenylphosphine)palladium(II) (35 mg, 0.05 mmol) under an argon atmosphere. The mixture was heated at 110 °C for 18 h, cooled to rt, water was added and the mixture was extracted with diethyl ether. The combined organic layer was washed with water, brine and dried over Na<sub>2</sub>SO<sub>4</sub>. The organic extracts were filtered and concentrated under reduced pressure. The crude residue was subjected to flash silica gel chromatography to give 0.065 g (59%) of the titled compound **23** as a white solid, mp 112-113 °C (lit.<sup>8</sup> mp 112-114 °C); <sup>1</sup>H-NMR (400 MHz, CDCl<sub>3</sub>)  $\delta$  2.42 (s, 3H), 7.53 (m, 1H), 7.70 (m, 2H), 7.84 (d, 1H,  $J = 8.0$  Hz), 8.17 (d, 1H,  $J = 8.8$  Hz), 8.27 (d, 1H,  $J = 8.4$  Hz) and 8.53 (m, 3H).

**Preparation of 1-(Pyridin-2-yl)isoquinoline (24).** To a solution of 1-bromoisoquinoline (**21a**) (0.1 g, 0.5 mmol) in 1 mL of dry degassed DMF was added 2-tri-*n*-butylstannylpyridine (**11**) (0.18 g, 0.5 mmol) and dichlorobis(triphenylphosphine)palladium(II) (35 mg, 0.05 mmol) under an argon atmosphere. The mixture was heated at 110 °C for 18 h, cooled to rt, water was added and the mixture was extracted with diethyl ether. The combined organic layer was washed with water, brine and dried over Na<sub>2</sub>SO<sub>4</sub>. The organic extracts were filtered and concentrated under reduced pressure. The crude residue was subjected to flash silica gel chromatography to give 0.043 g (41%) of the titled compound **24** as a white solid; mp 71-72 °C (lit.<sup>9</sup> mp 71-72 °C); <sup>1</sup>H-NMR (400 MHz, CDCl<sub>3</sub>)  $\delta$  7.40 (m, 1H), 7.60 (m, 1H), 7.69 (m, 2H), 7.90 (m, 2H), 8.00 (dt, 1H,  $J = 8.0$  and 1.2 Hz), 8.60 (dd, 1H,  $J = 8.4$  and 1.0 Hz), 8.63 (d, 1H,  $J = 5.6$  Hz) and 8.79 (m, 1H).

**Preparation of 2-Tri-*n*-butylstannylquinoline (37).** A sample of 2-bromoquinoline (**20a**) (1.04 g, 5 mmol) was taken up in dry THF (10 mL) and the solution was cooled to -78 °C under an argon atmosphere. To this mixture was added 2.2 mL of a 2.5 M *n*-butyllithium solution in hexane (5.5 mmol) dropwise. After stirring for 1 h at -78 °C, tri-*n*-butyltin chloride (1.76 mL, 6.5 mmol) was added dropwise to the above solution

which was then allowed to stir overnight. After removal of the solvent under reduced pressure, the residue was taken up in ethyl acetate (50 mL) and water (20 mL). The combined organic layer was washed with brine and dried over Na<sub>2</sub>SO<sub>4</sub>, filtered, and concentrated under reduced pressure to give 1.64 g (78%) of 2-tri-*n*-butylstannylquinoline (**37**) which was used directly in the Stille coupling step without further purification.

**Preparation of 2-(Isoquinolin-1-yl)quinoline (38).** To a solution of 1-bromoisoquinoline (**21a**) (0.1 g, 0.5 mmol) in 1 mL of dry degassed DMF was added 2-tri-*n*-butylstannylquinoline (**37**) (0.21 g, 0.5 mmol) and dichlorobis(triphenylphosphine)-palladium(II) (35 mg, 0.05 mmol) under an argon atmosphere. The mixture was heated at 110 °C for 18 h, cooled to rt, water was added and the mixture was extracted with diethyl ether. The combined organic layer was washed with water, brine and dried over Na<sub>2</sub>SO<sub>4</sub>. The organic extracts were filtered and concentrated under reduced pressure. The crude residue was subjected to flash silica gel chromatography to give 0.062 g (49%) of the titled compound **38** as a light yellow solid, mp 128-129 °C (lit.<sup>10</sup> mp 128-129 °C); <sup>1</sup>H-NMR (400 MHz, CDCl<sub>3</sub>) δ 7.61 (m, 2H), 7.75 (m, 3H), 7.93 (t, 2H, J = 6.8 Hz), 8.15 (d, 1H, J = 5.2 Hz), 8.25 (d, 1H, J = 8.4 Hz), 8.37 (d, 1H, J = 8.8 Hz), 8.69 (d, 1H, J = 5.6 Hz) and 8.82 (d, 1H, J = 8.4 Hz).

**Preparation of [2,2']Biquinolinyl (39).** To a solution of 2-bromoquinoline (**20a**) (0.1 g, 0.5 mmol) in 1 mL of dry degassed DMF was added 2-tri-*n*-butylstannylquinoline (**37**) (0.21 g, 0.5 mmol) and dichlorobis(triphenylphosphine)palladium(II) (35 mg, 0.05 mmol) under an argon atmosphere. The mixture was heated at 110 °C for 18 h, cooled to rt, water was added and the mixture was extracted with diethyl ether. The combined organic layer was washed with water, brine and dried over Na<sub>2</sub>SO<sub>4</sub>. The organic extracts were filtered and concentrated under reduced pressure. The crude residue was subjected to flash silica gel chromatography to give 0.087 g (68%) of the titled compound **39** as a light yellow solid, mp 193-195 °C (lit.<sup>11</sup> mp 193-196 °C); <sup>1</sup>H-NMR (400 MHz, CDCl<sub>3</sub>) δ 7.57 (m, 2H), 7.72 (m, 2H), 7.89 (d, 2H, J = 8.0 Hz), 8.24 (d, 2H, J = 8.4 Hz), 8.33 (d, 2H, J = 8.4 Hz) and 8.86 (d, 2H, J = 8.8 Hz).

## References

1. (a) Zhang, H.; Tse, M. K.; Chan, K. S. *Synth. Commun.* **2001**, *31*, 1129. (b) Nicolaou, K. C.; Scarpelli, R.; Bollbuck, B.; Werschkun, B.; Pereira, M. M. A.; Wartmann, M.; Altmann, K-H.; Zaharevitz, D.; Gussio, R.; Giannakakou, P. *Chem. Biol.* **2000**, *7*, 593. (c) Bedel, S.; Ulrich, G.; Picard, C.; Tisnes, P. *Synthesis* **2002**, *11*, 1564.
2. Schwab, P. F. H.; Fleischer, F.; Michl, J. *J. Org. Chem.* **2002**, *67*, 443.
3. (a) Schubert, U. S.; Eschbaumer, C.; Heller, M. *Org. Lett.* **2000**, *2*, 3373 and references cited therein. (b) Potts, K. T.; Winslow, P. A. *J. Org. Chem.* **1985**, *50*, 5405.
4. Schubert, U. S.; Eschbaumer, C.; Hochswimmer, G. *Synthesis* **1999**, *5*, 779.
5. Sigouin, O.; Beauchamp, A. L.; *Can. J. Chem.* **2005**, *83*, 460.
6. Petitjean, A.; Kyritsakas, N.; Lehn, J.-M. *Chem. Eur. J.* **2005**, *11*, 6818.
7. Martinez, R.; Ramon, D. J.; Yus, M. *Tetrahedron* **2006**, *62*, 8988.
8. Haginiwa, J.; Higuchi, Y.; Kawashima, T.; Goto, T. *Yakugaku Zasshi* **1975**, *95*, 204.
9. Knapp, D. M.; Gillis, E. P.; Burke, M. D. *J. Am. Chem. Soc.* **2009**, *131*, 6961.
10. Hoste, J. *Anal. Chim. Acta* **1950**, *4*, 23.
11. Dumouchel, S.; Mongin, F.; Trécourt, F.; Quéguiner, G. *Tetrahedron* **2003**, *59*, 8629.



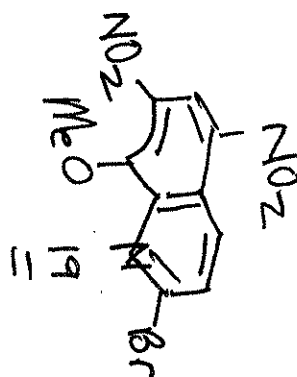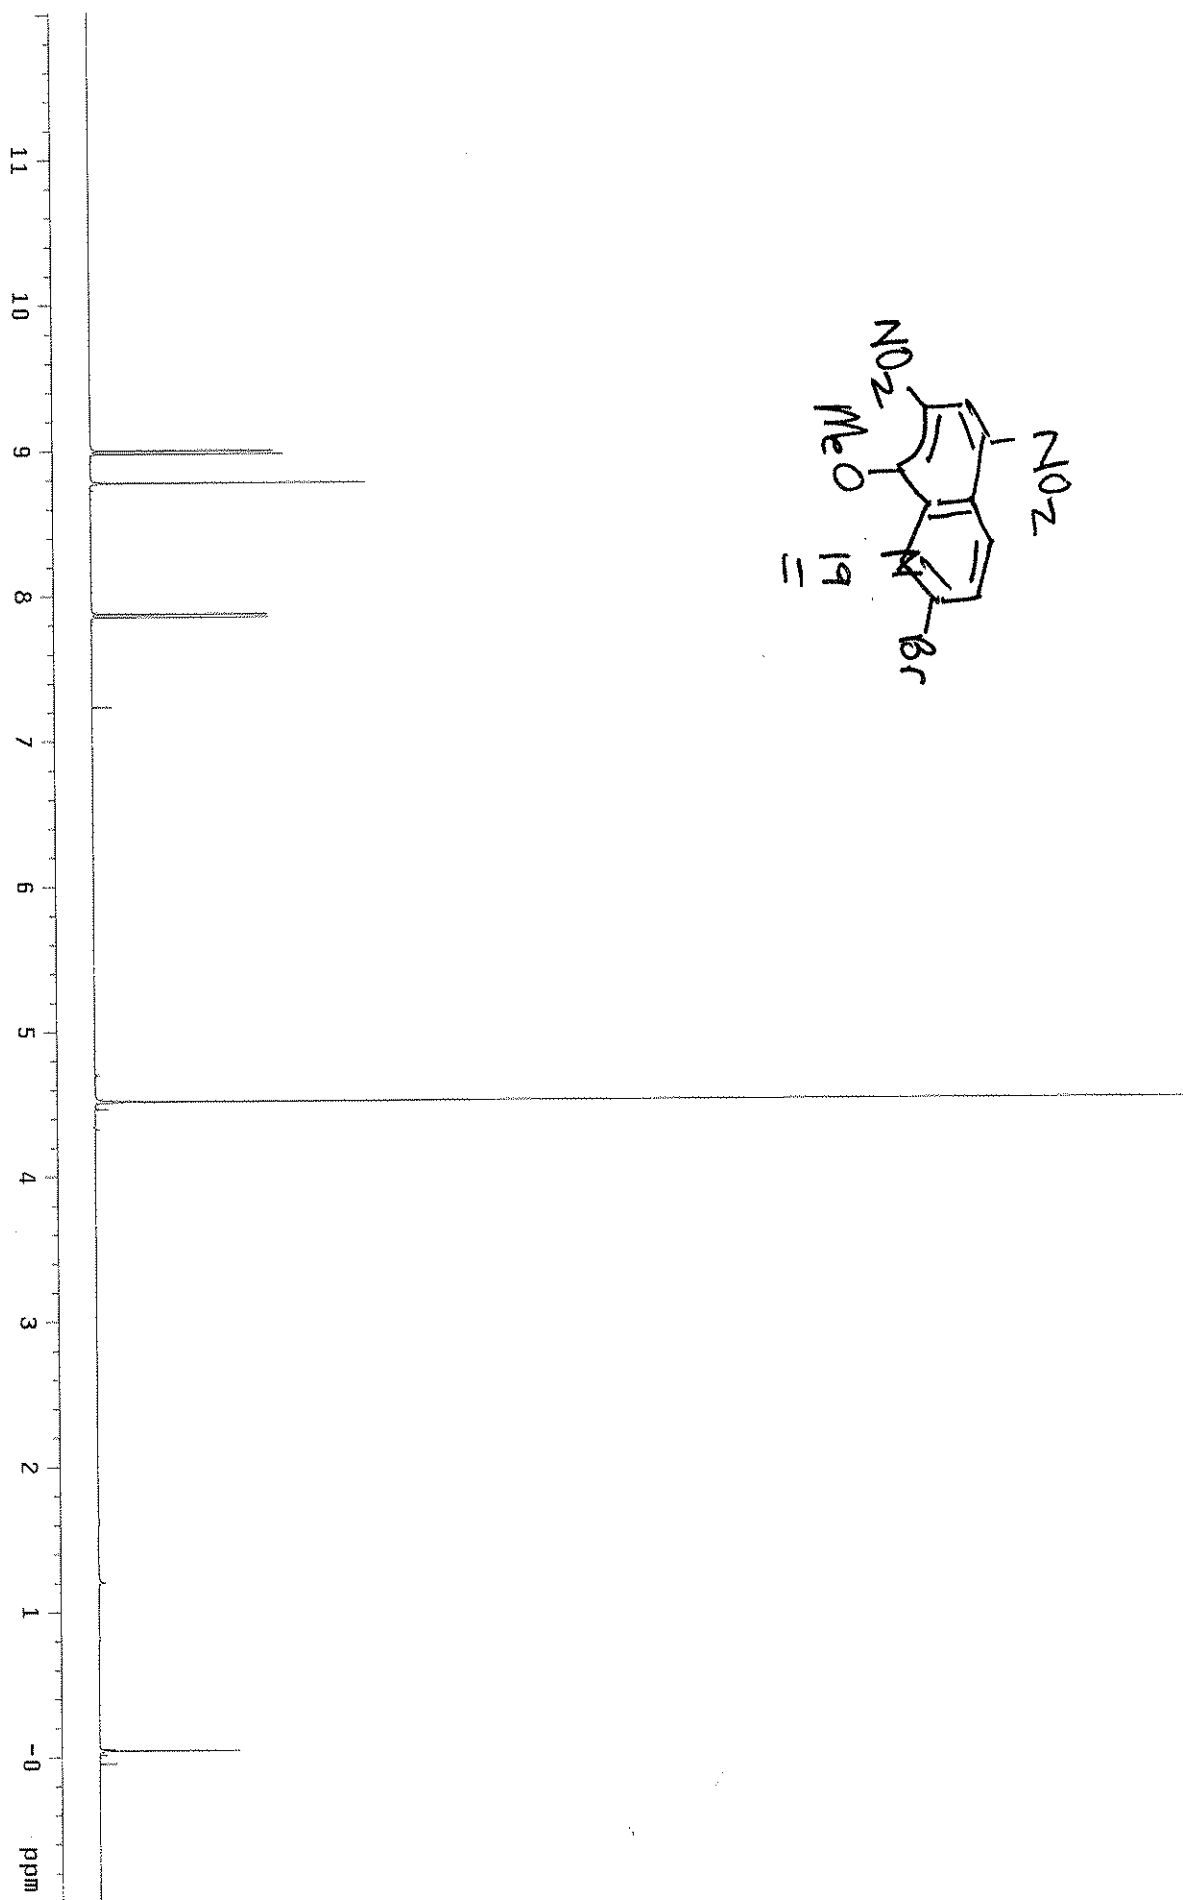

920A  
Pulse Sequence: s2pu1

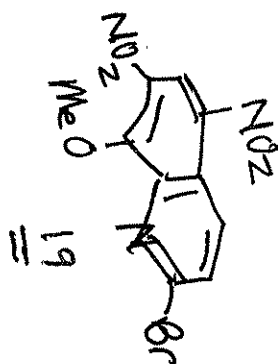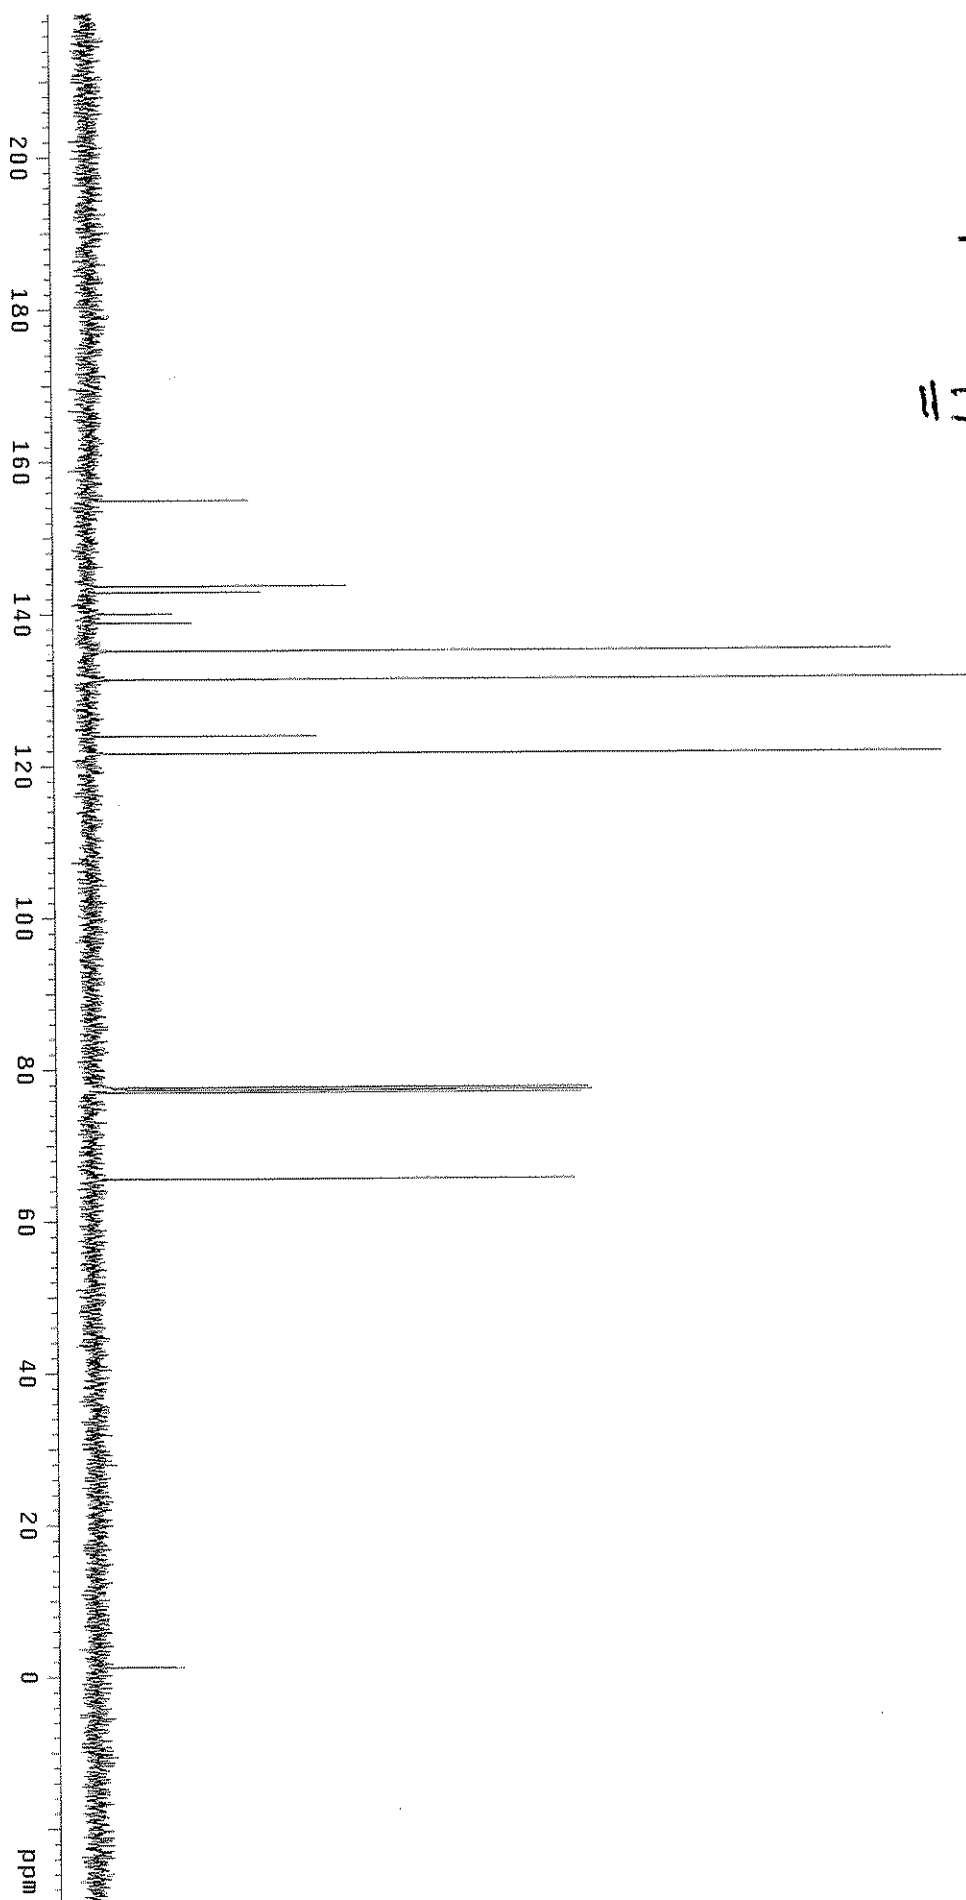

115-1  
Pulse Sequence: szpu1

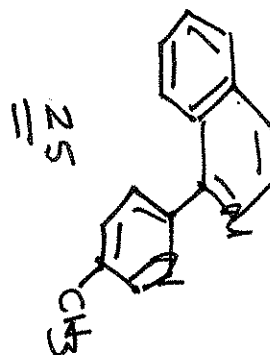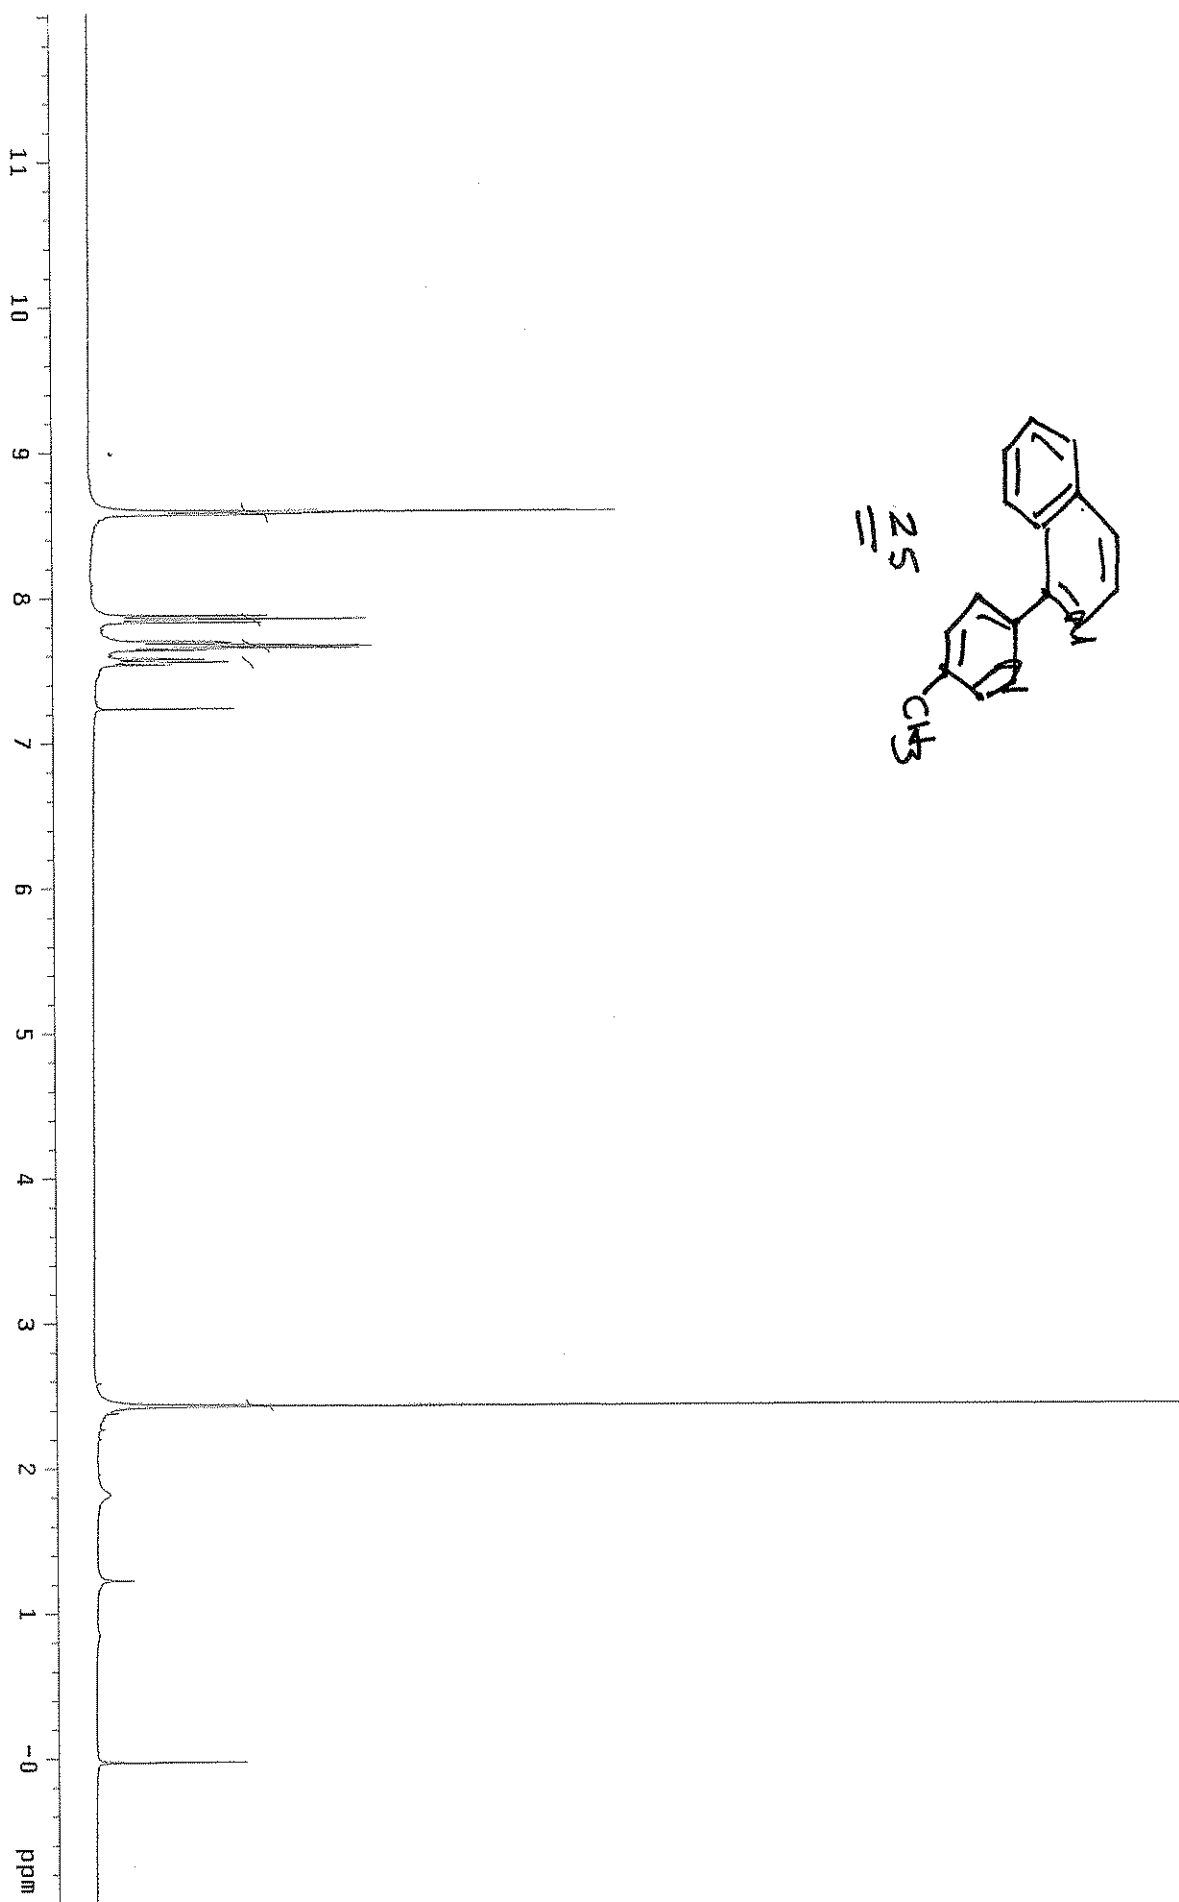

115-1  
Pulse Sequence: sqpu1

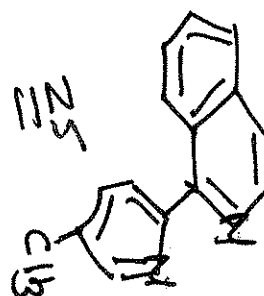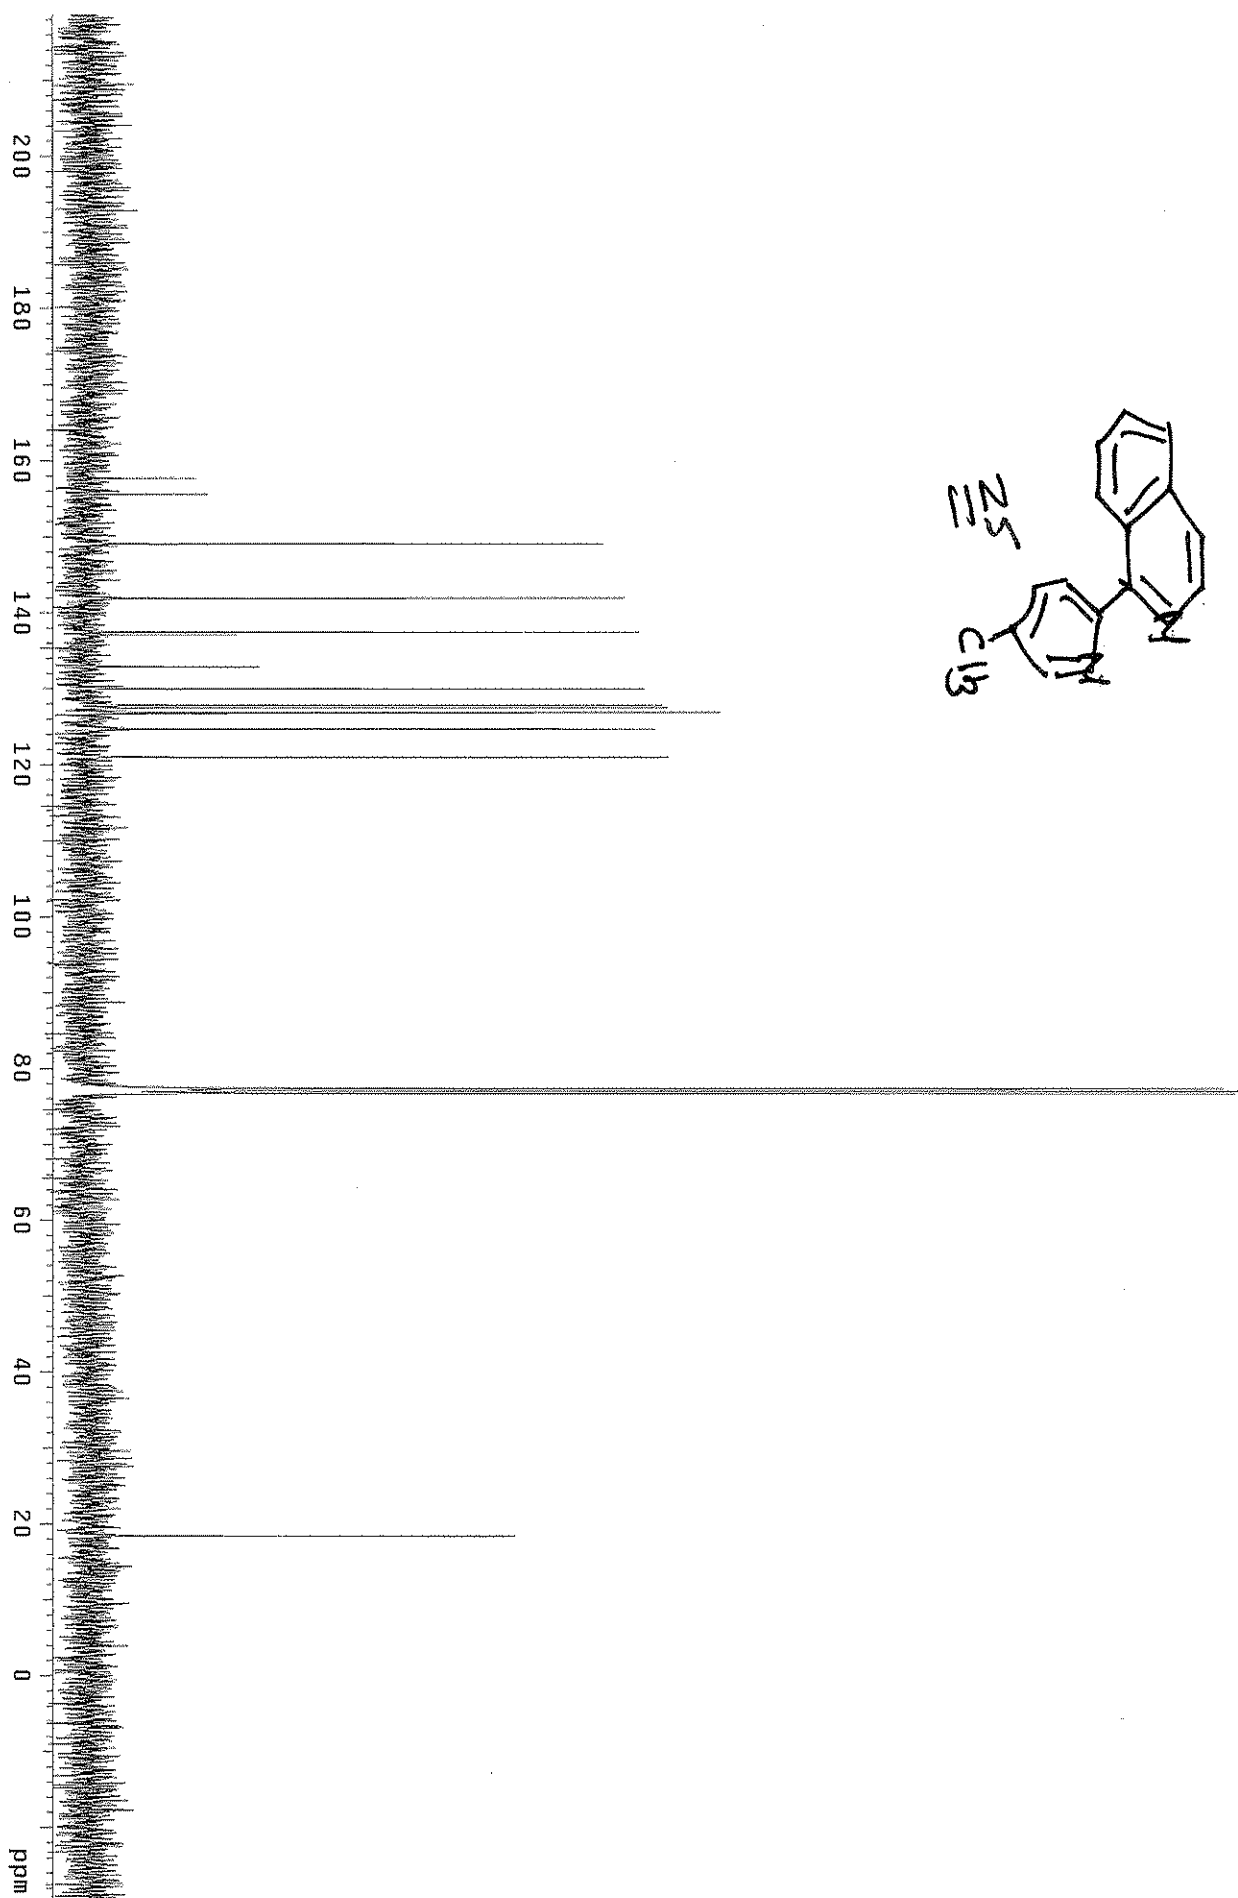

0116  
Pulse Sequence: szpu1

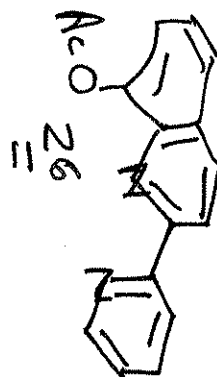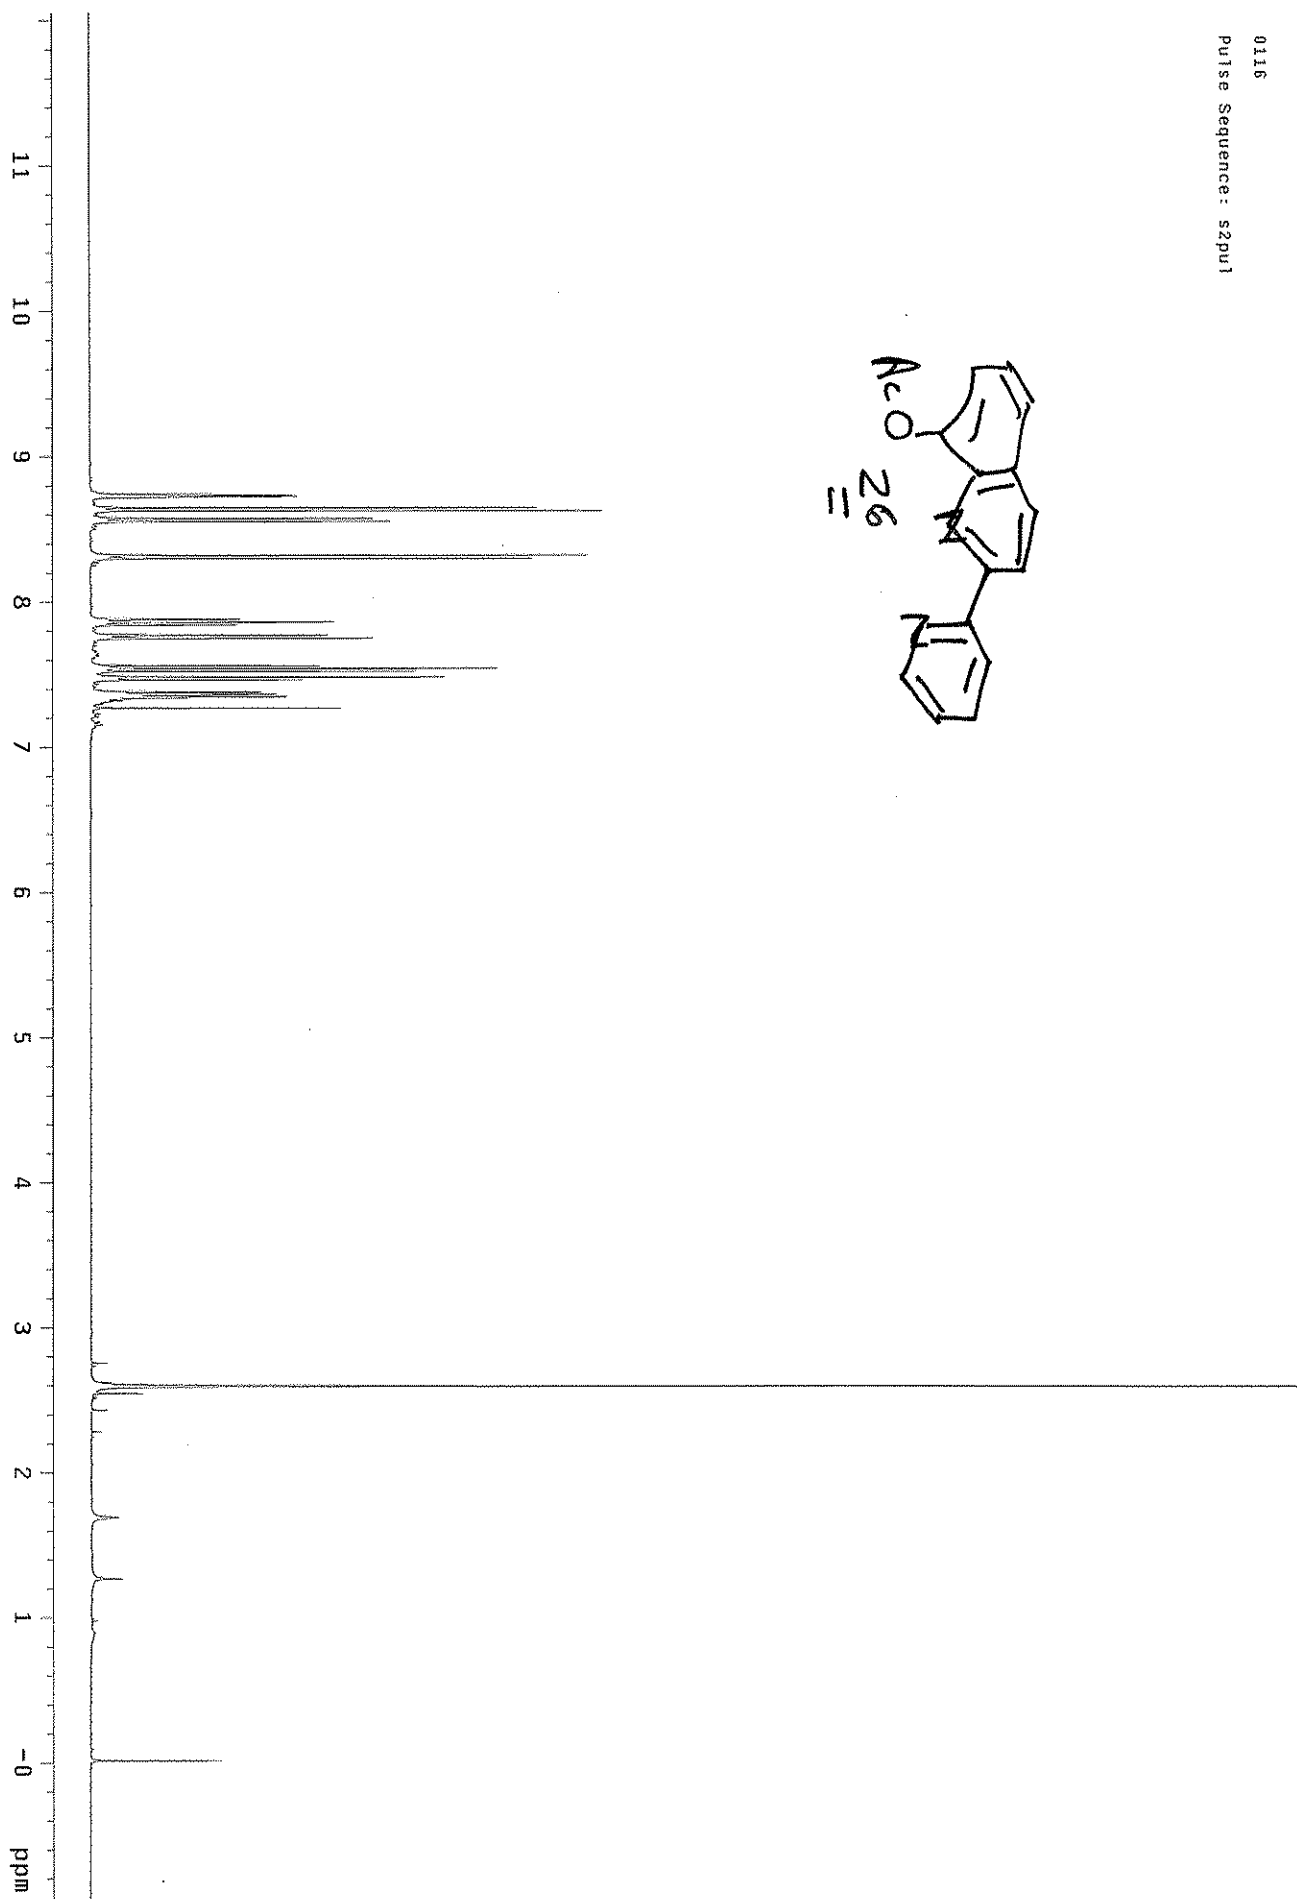

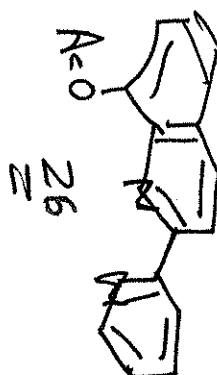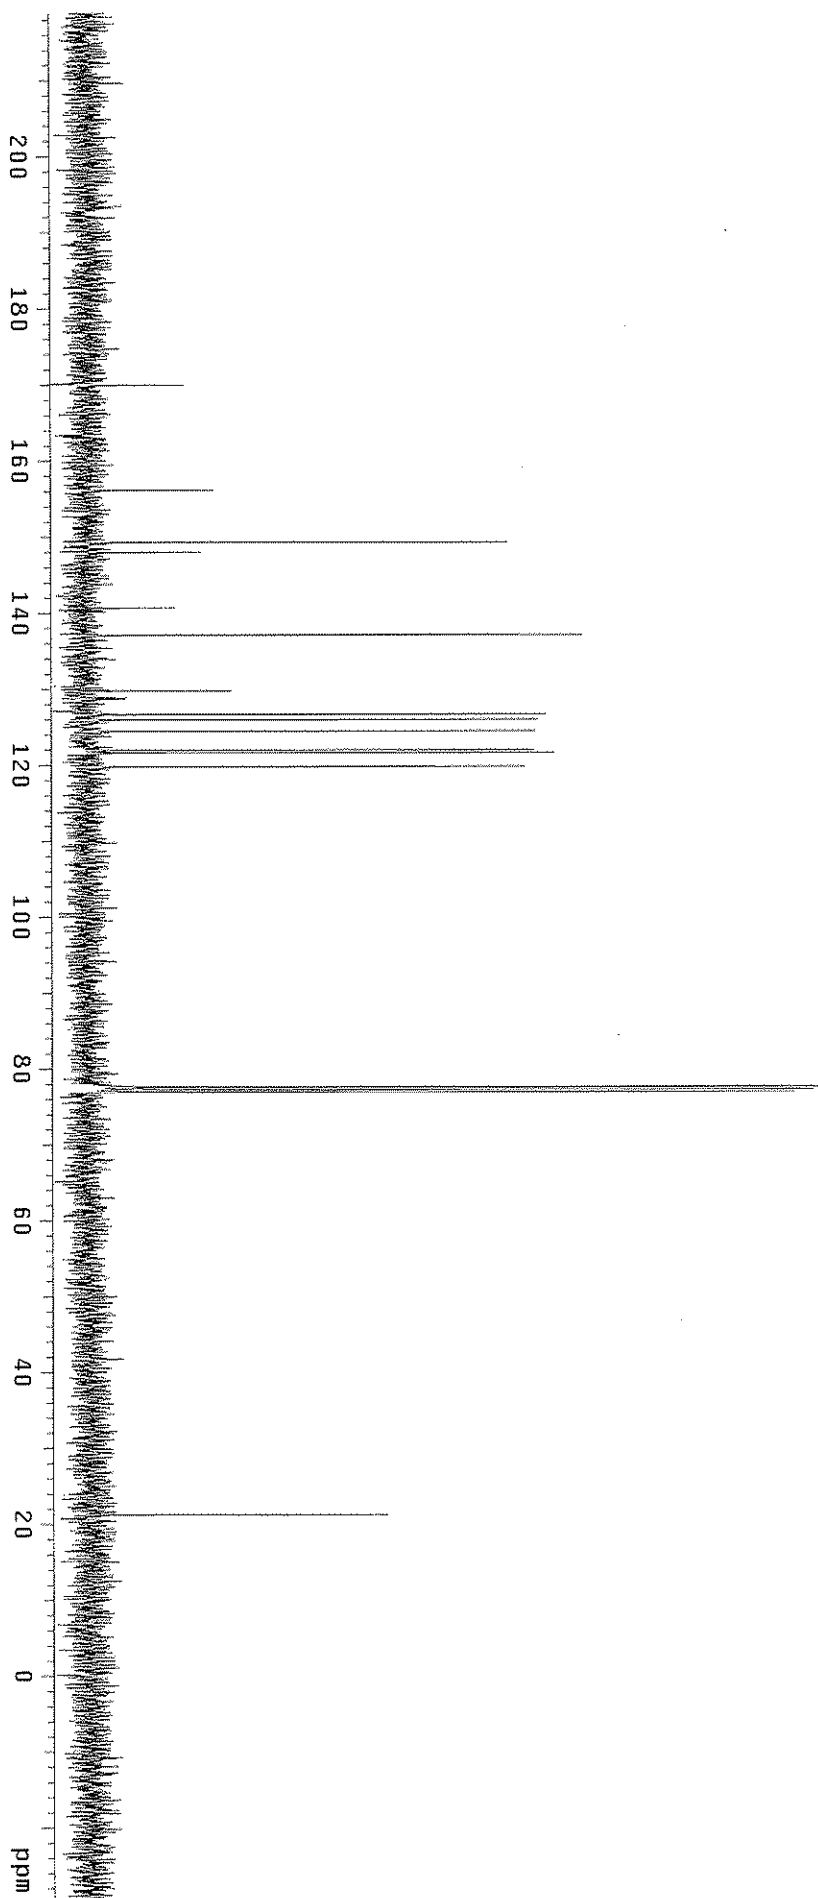

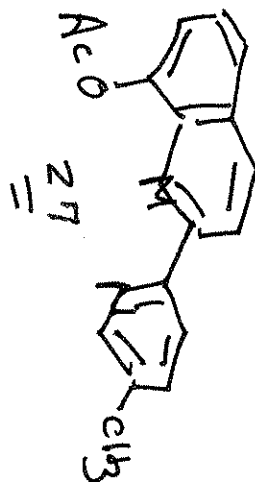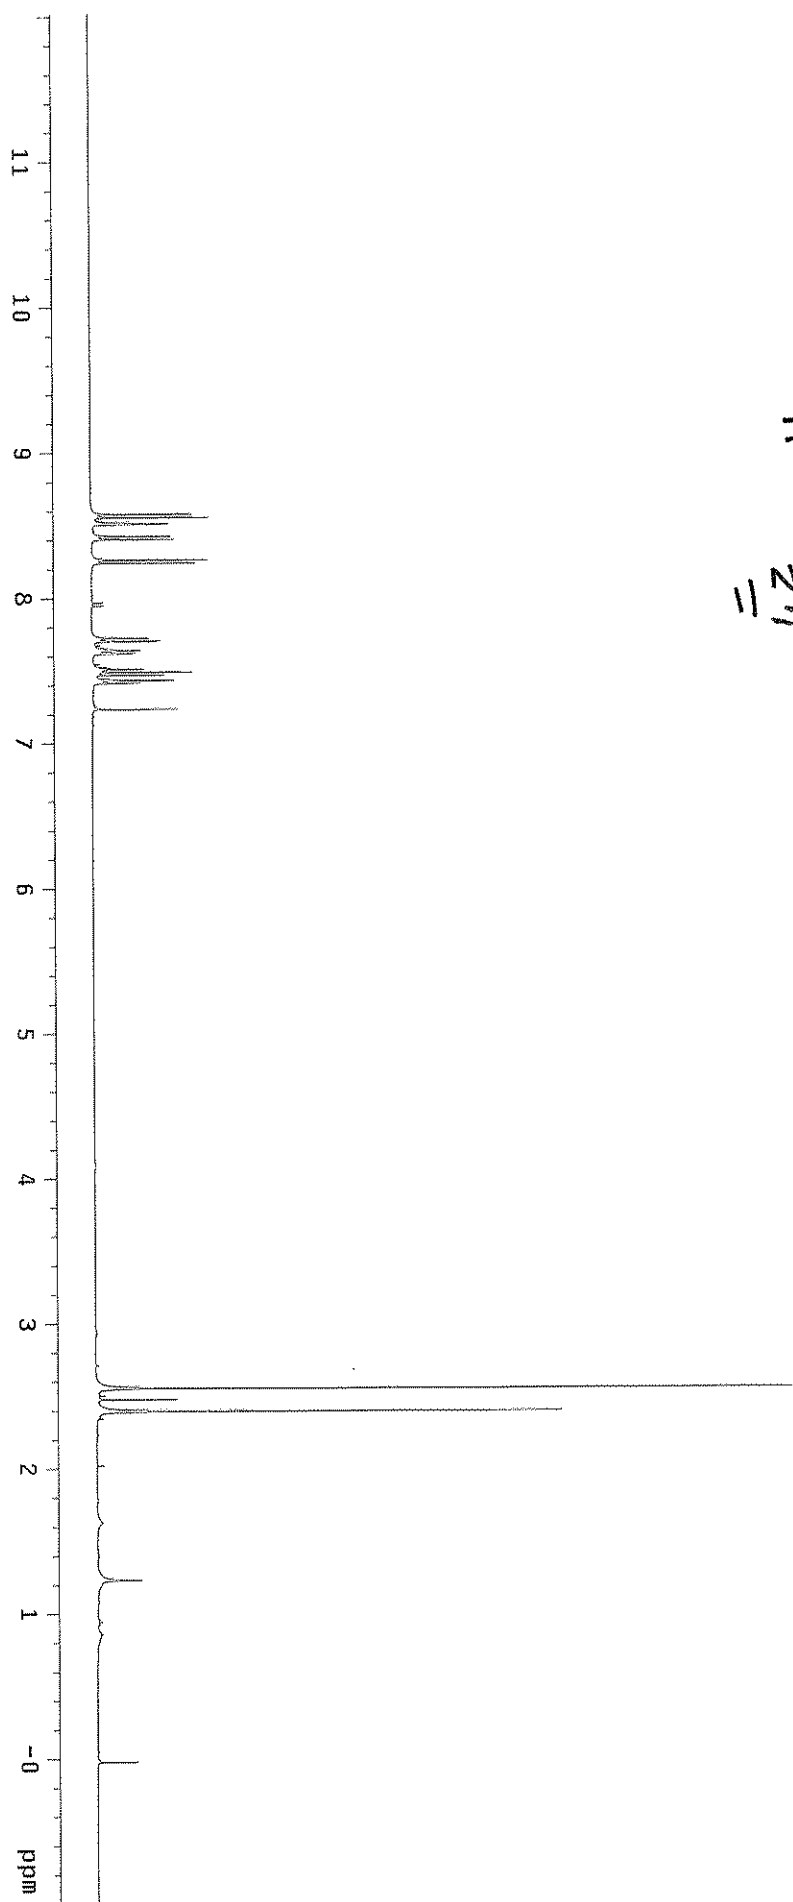

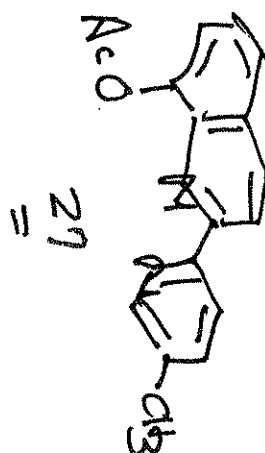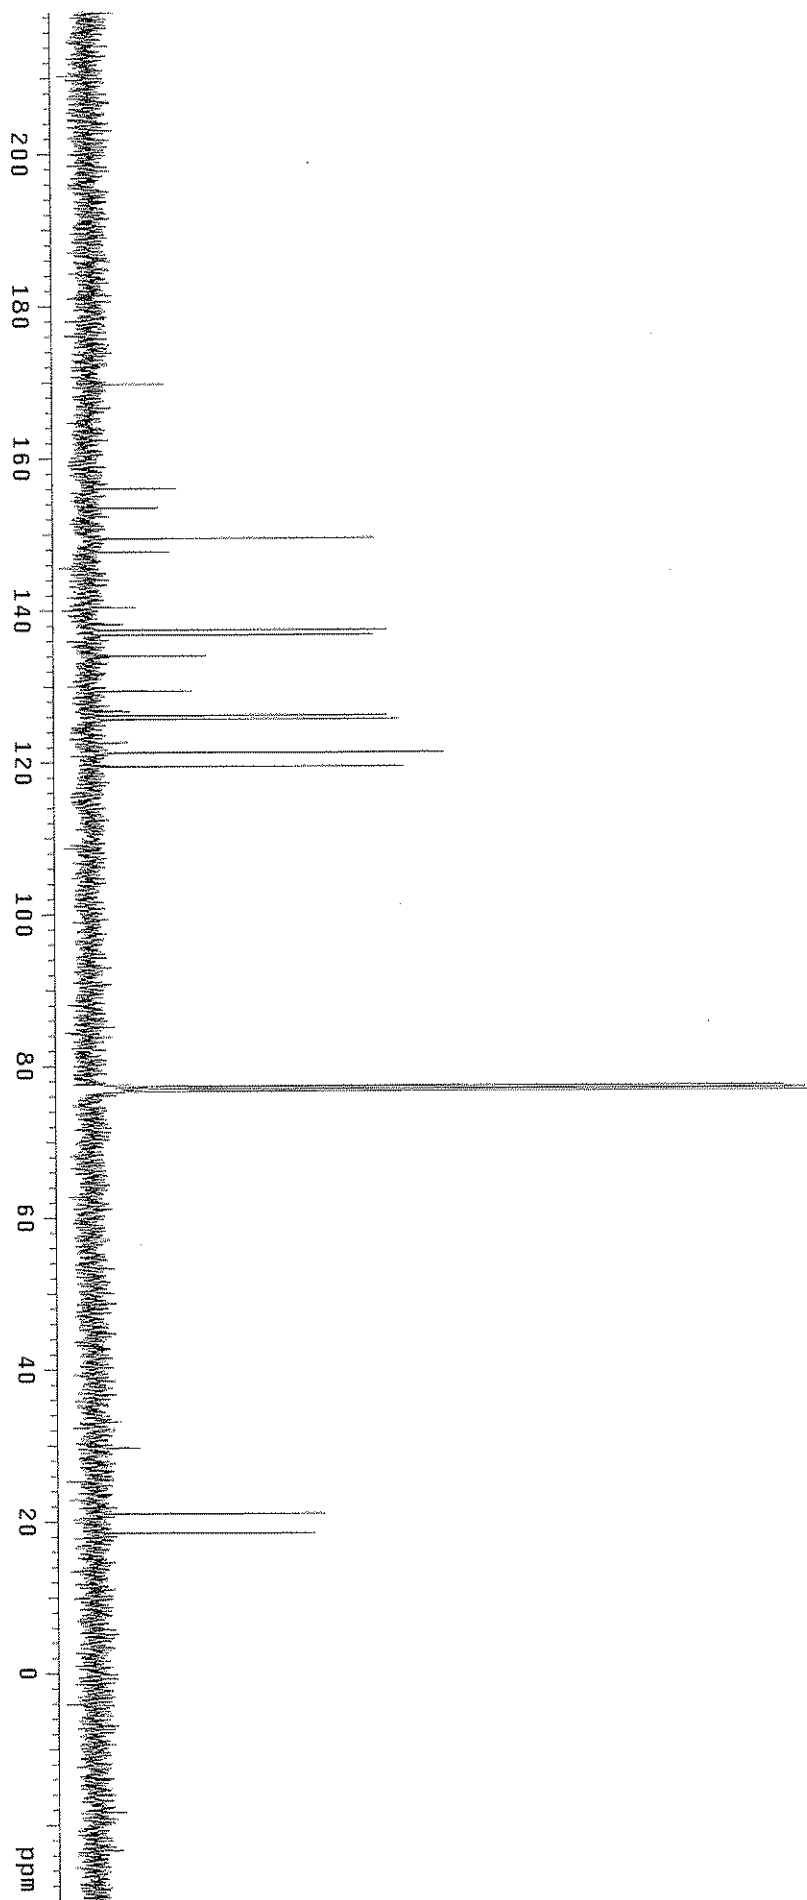



1014-1  
Pulse Sequence: szpu1

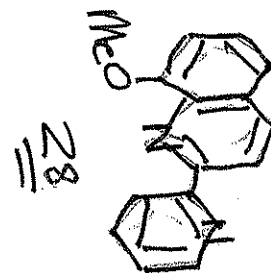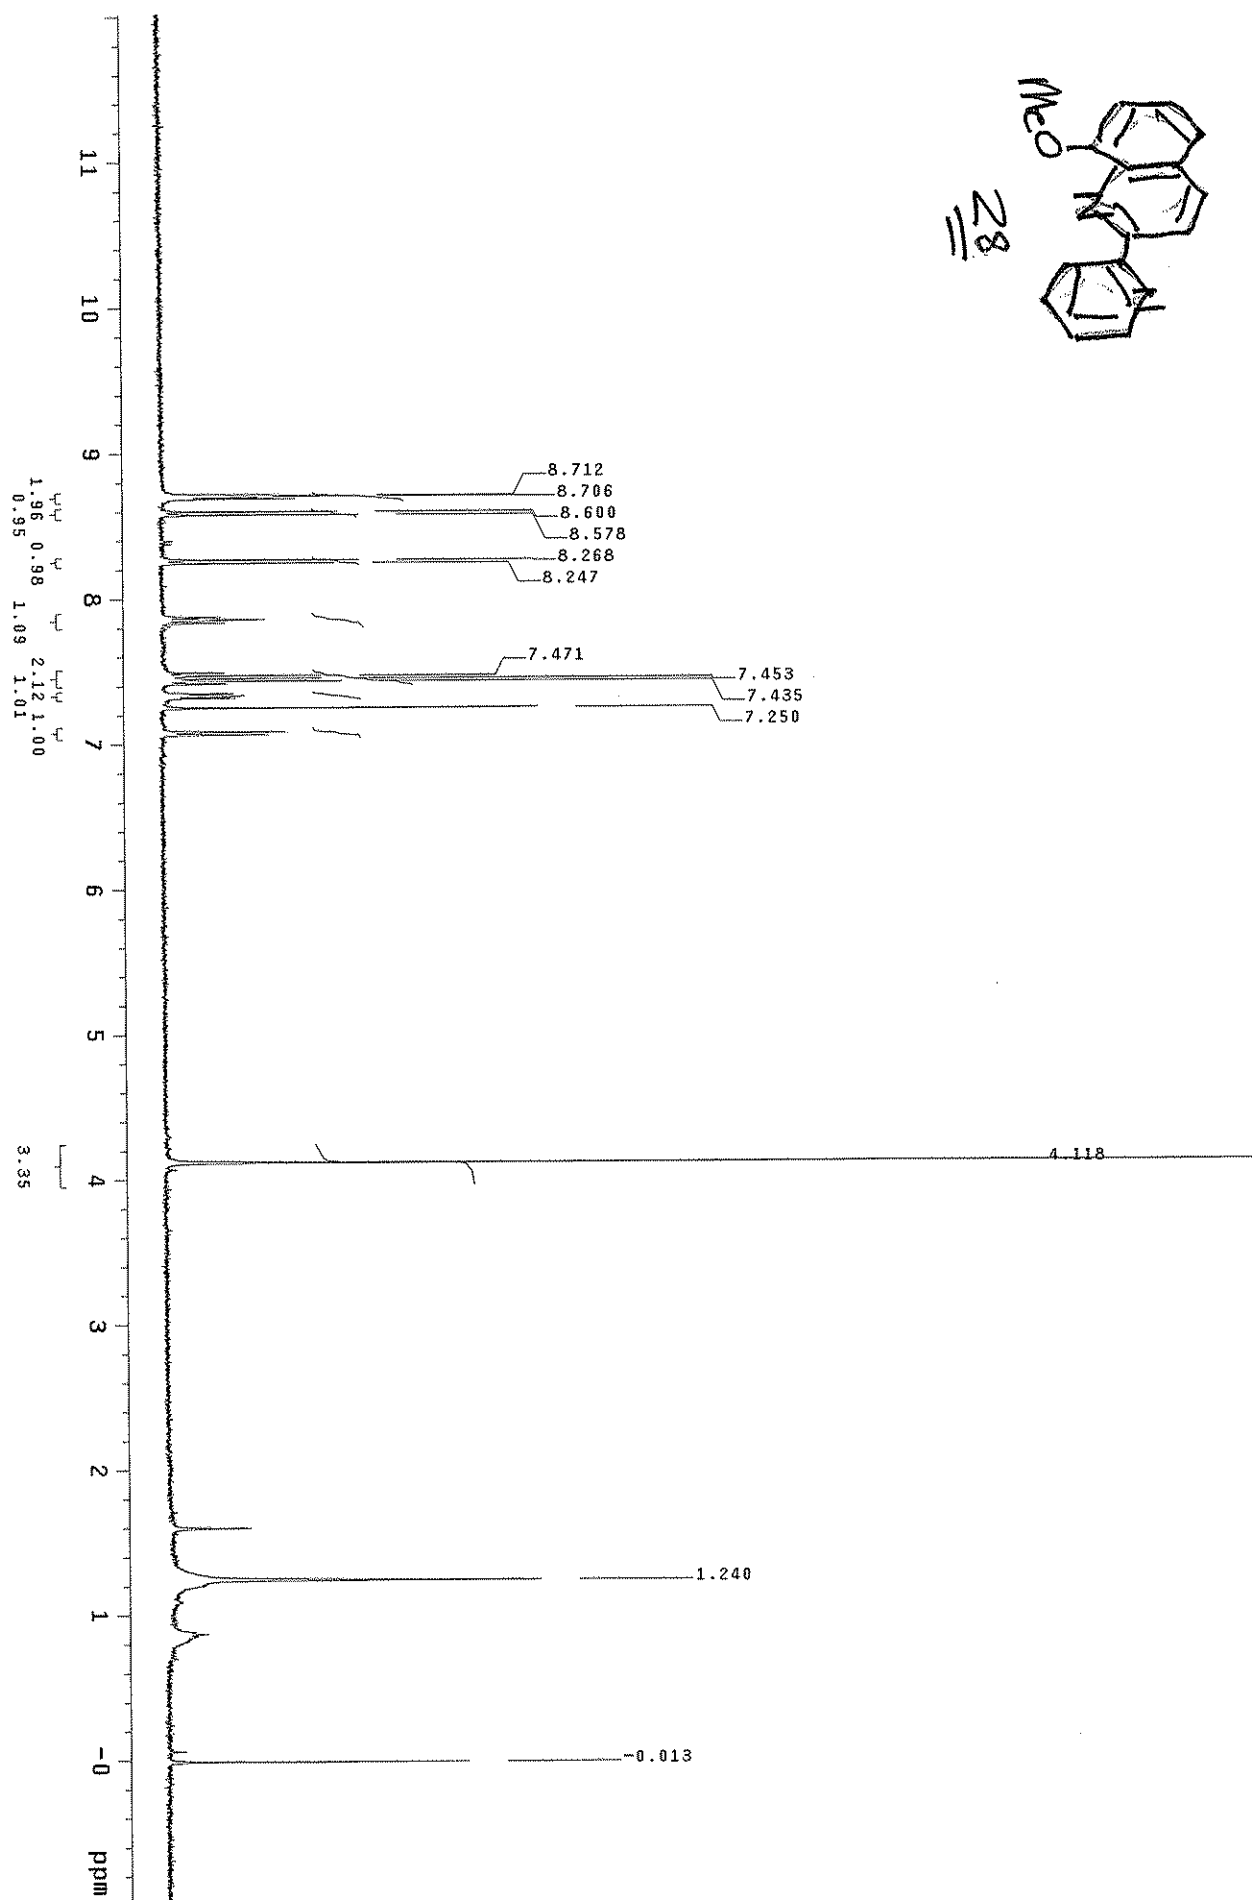

1014-1  
Pulse Sequence: szpul

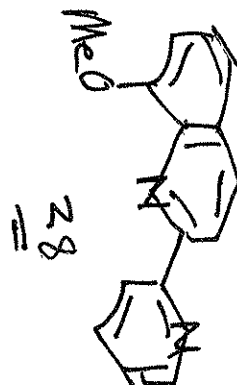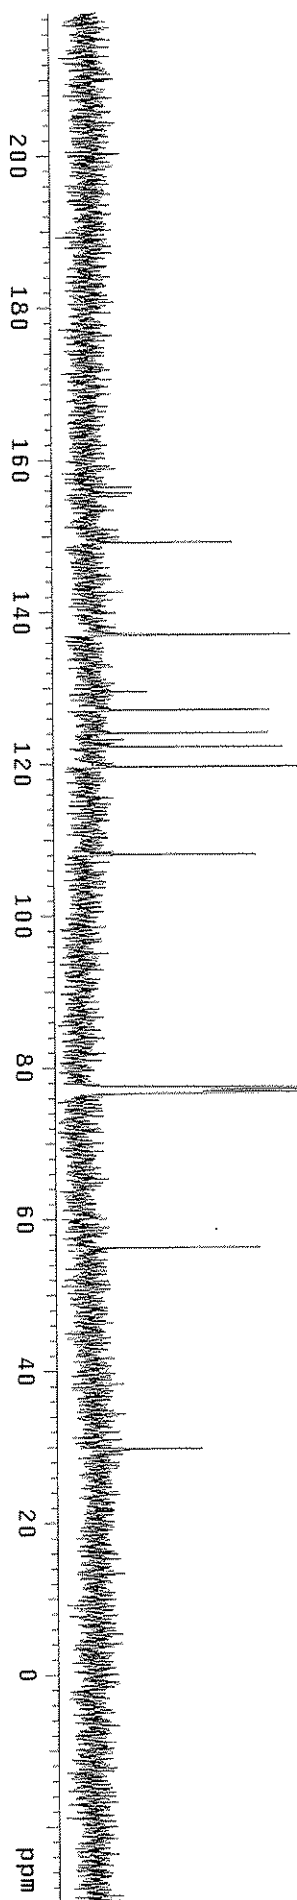

1102-3  
Pulse Sequence: s2pul

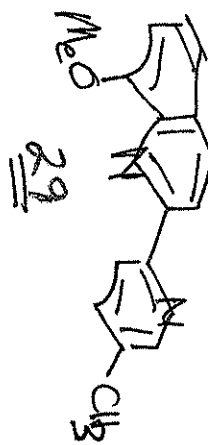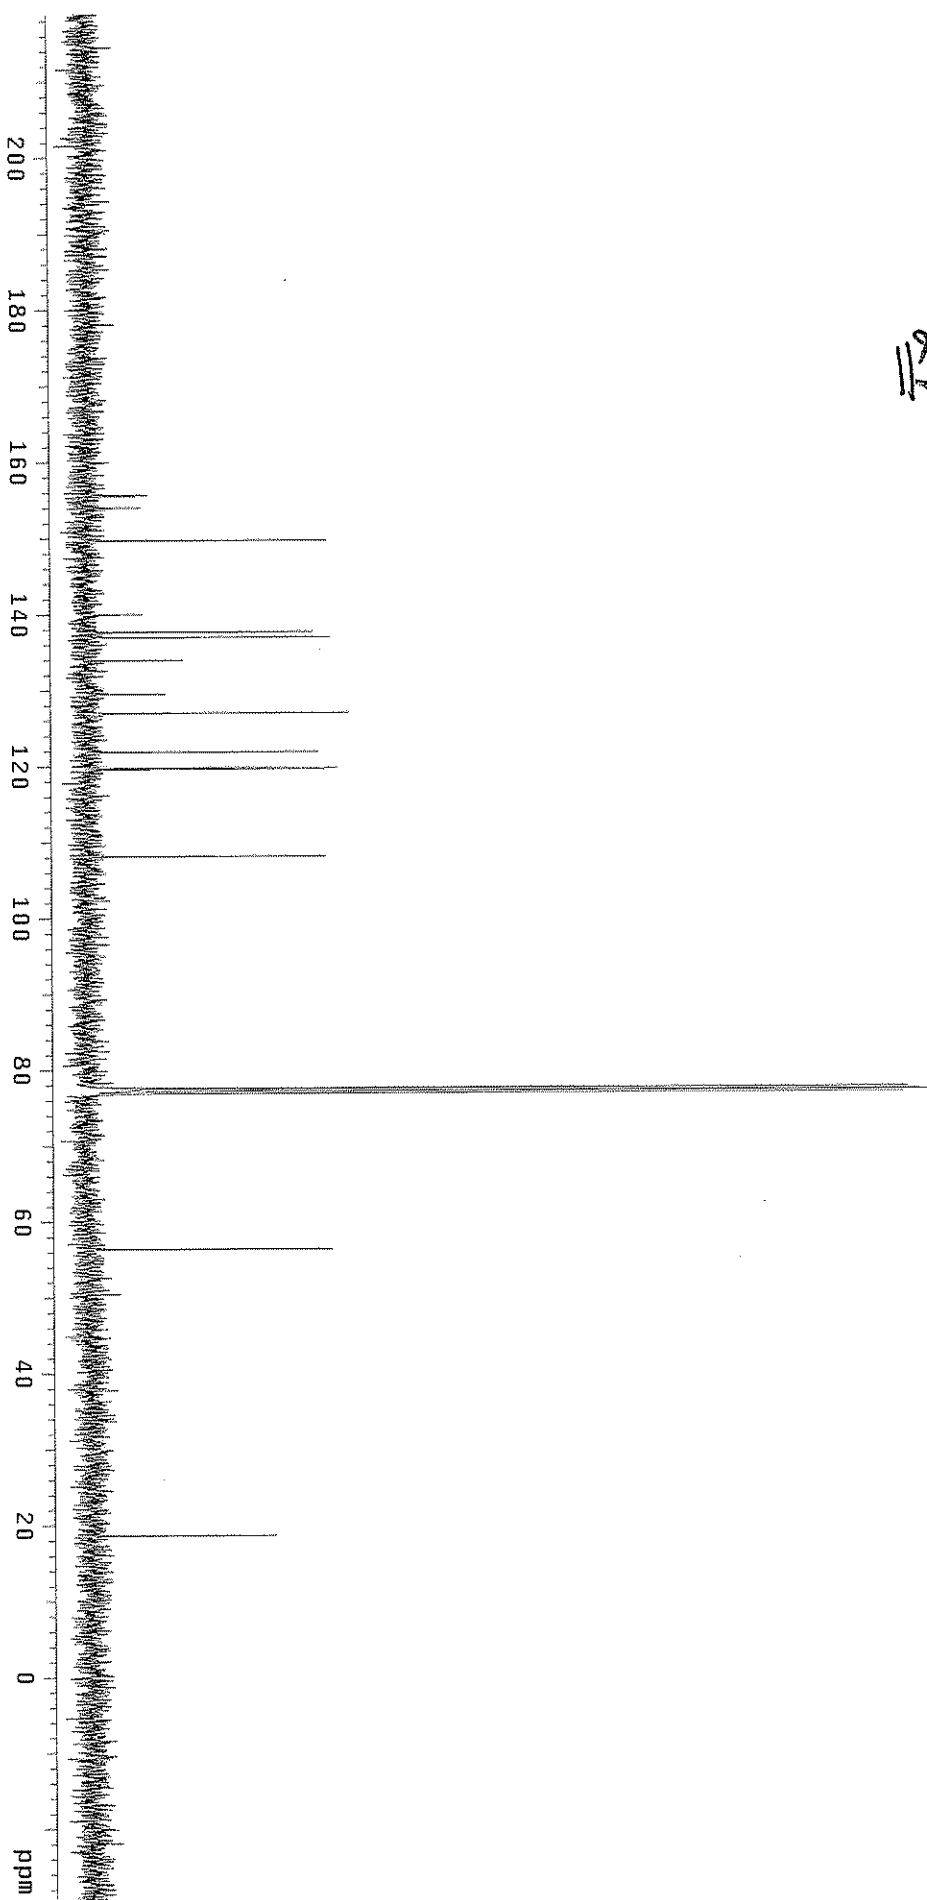

1102-3  
Pulse Sequence: s2pu1

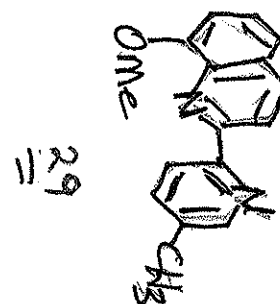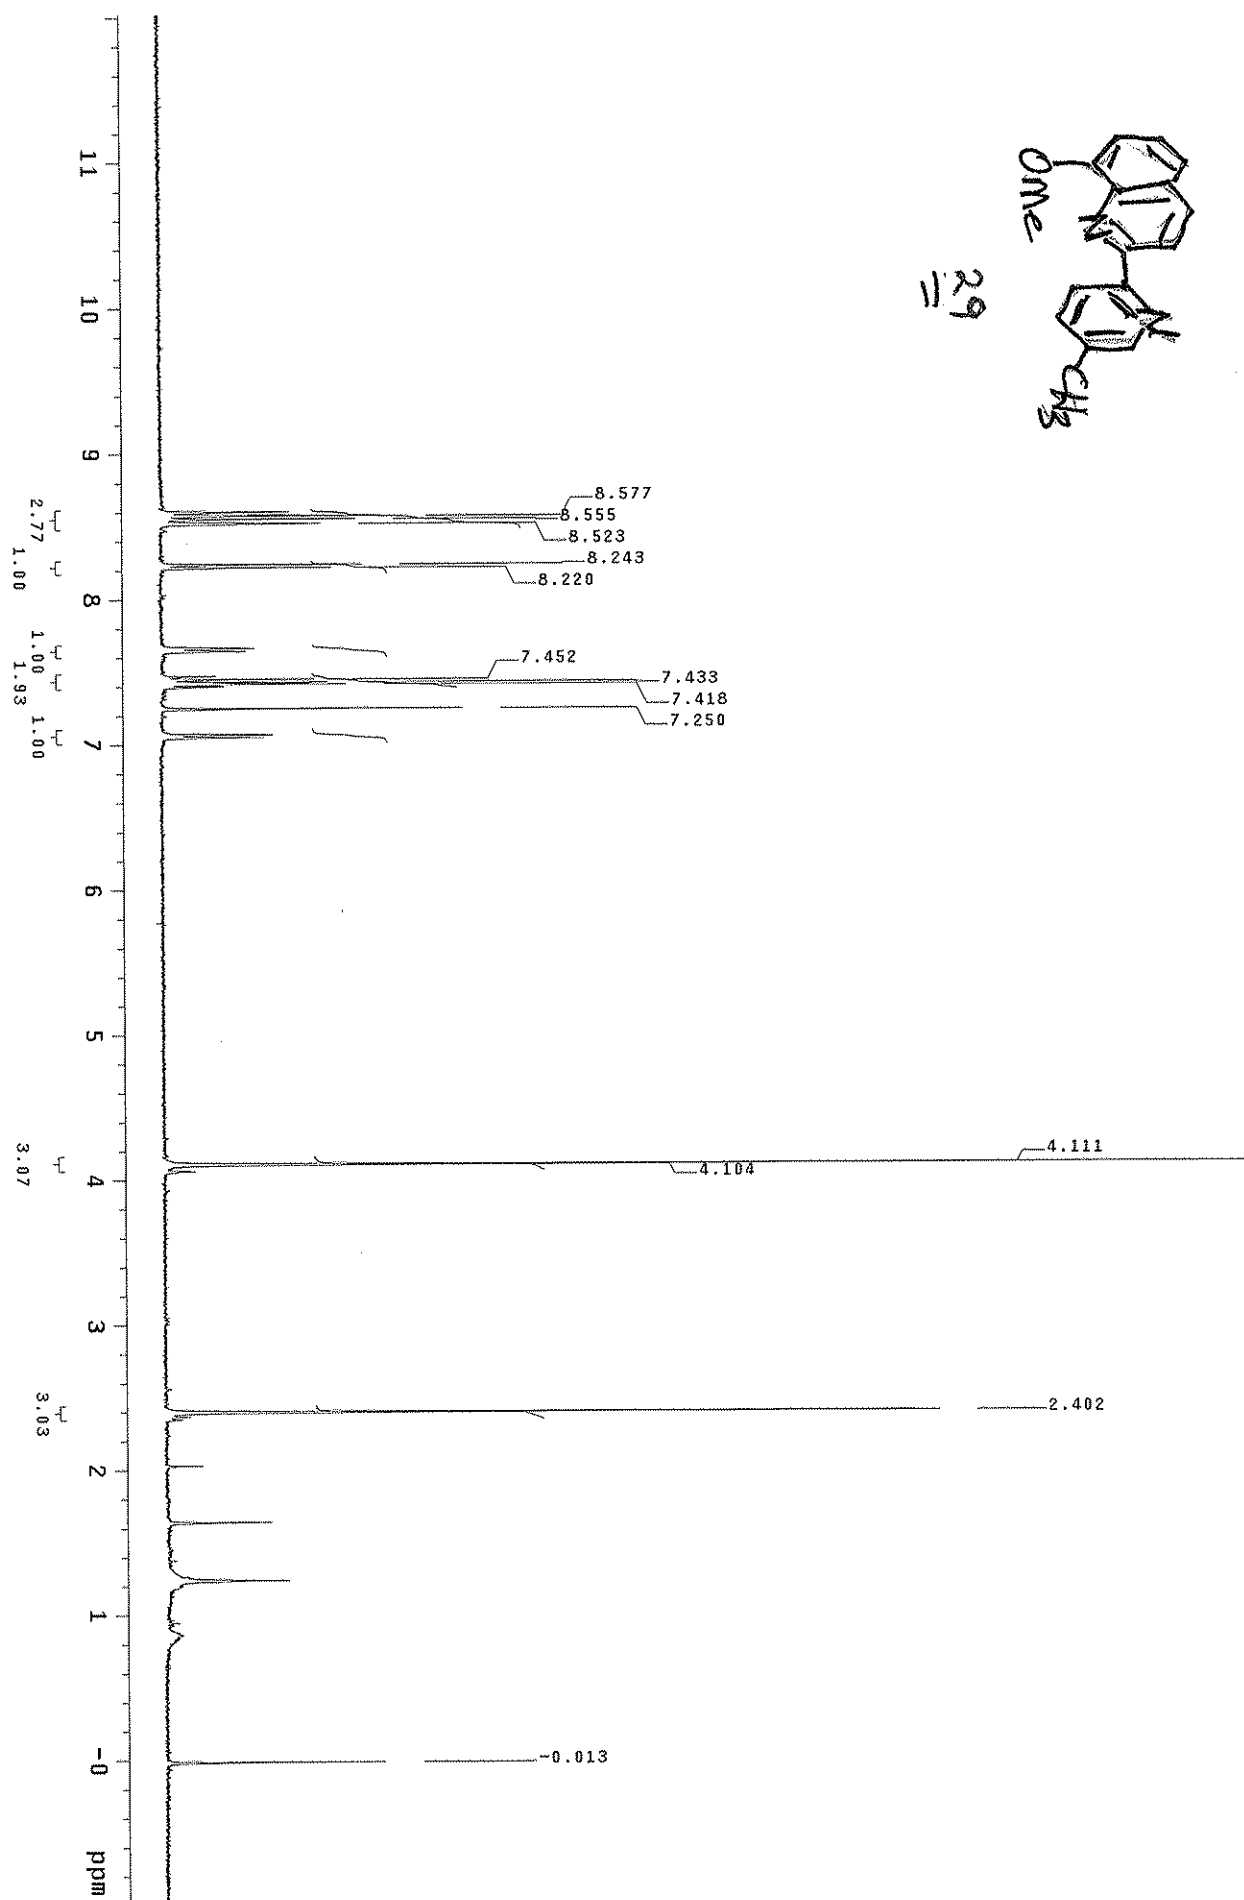

1025-1

Pulse Sequence: s2pu1

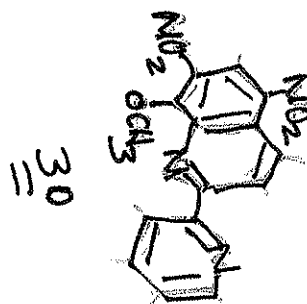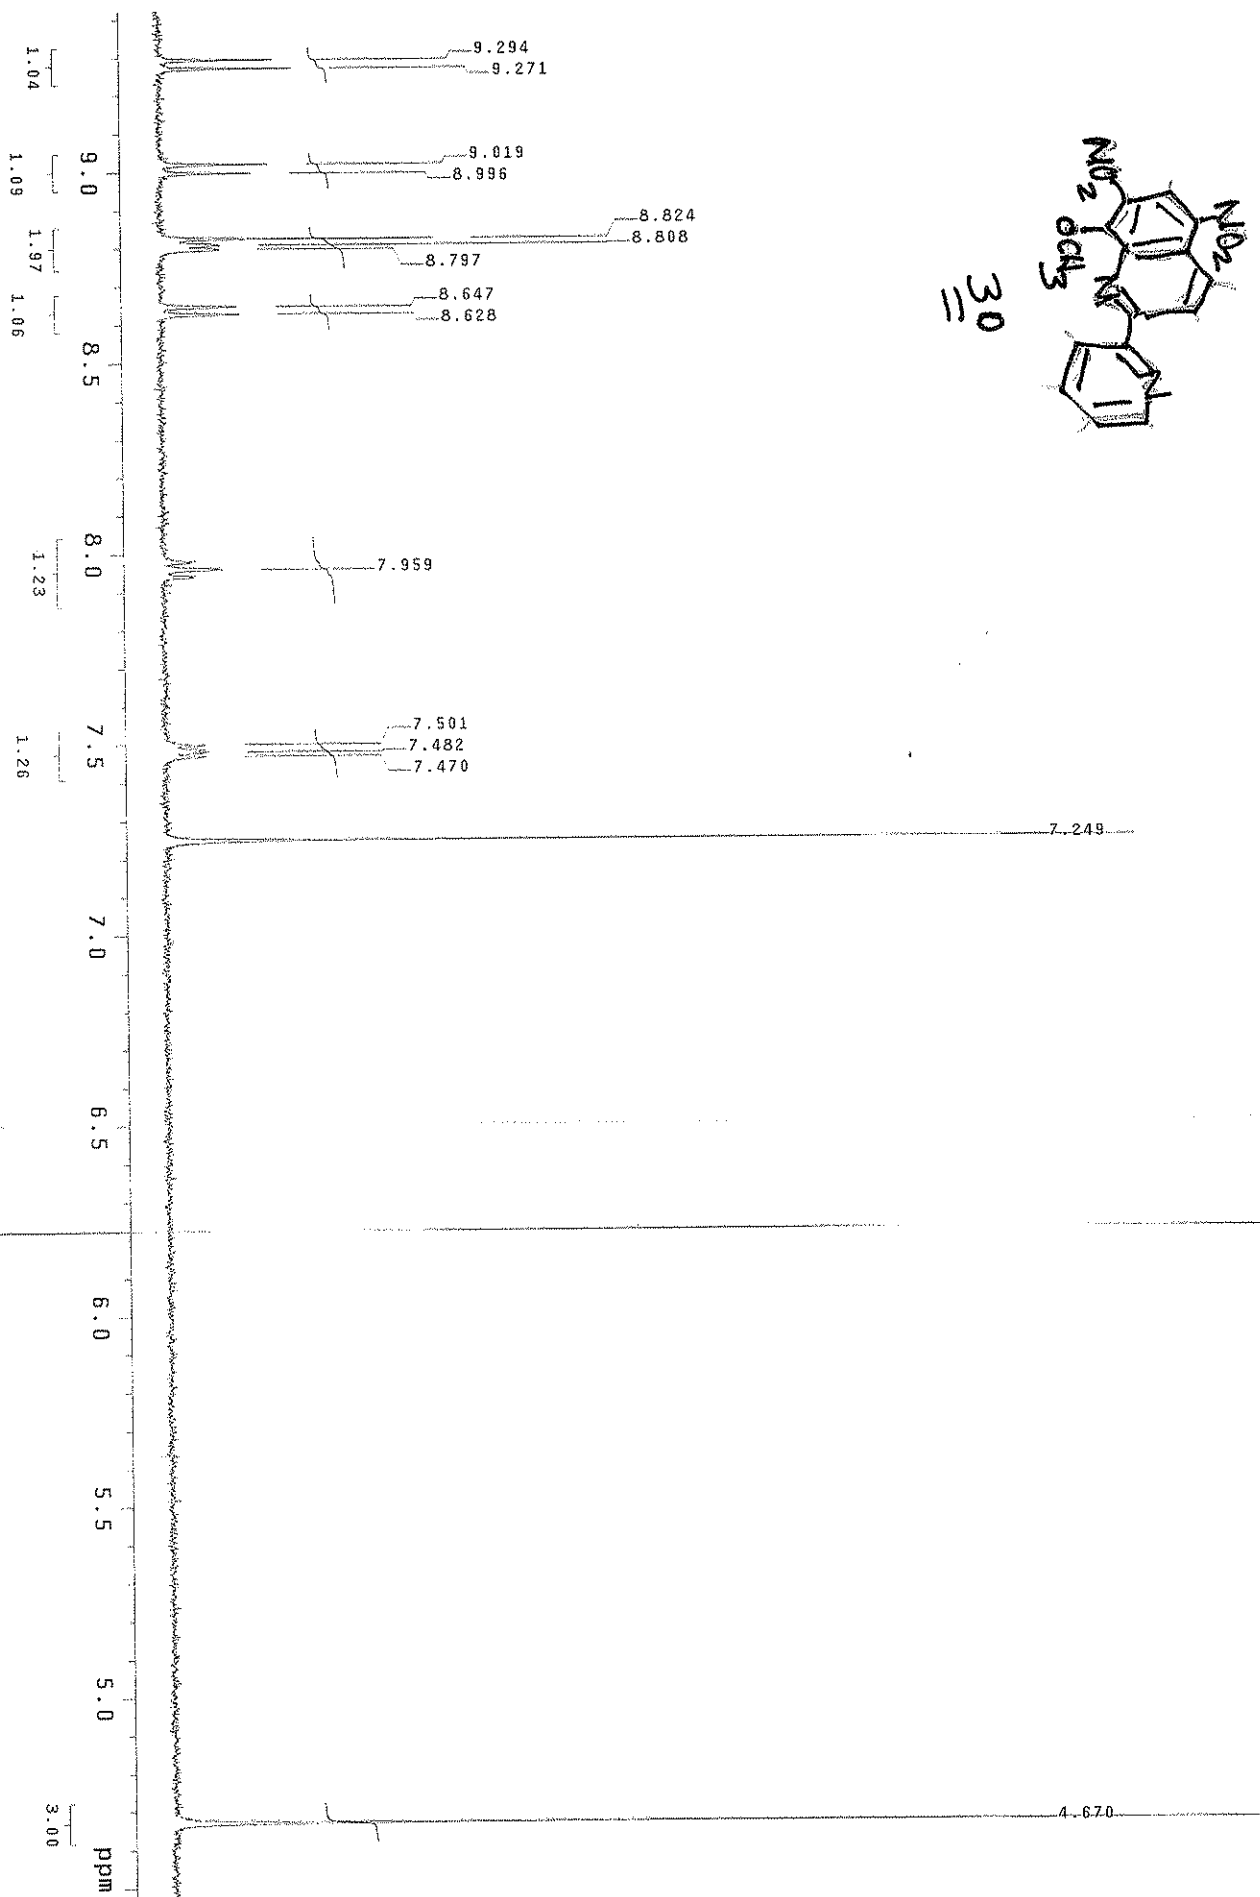

1228  
Pulse Sequence: s2pu1

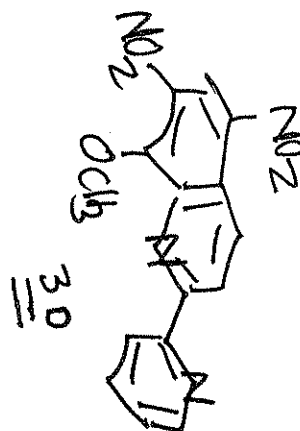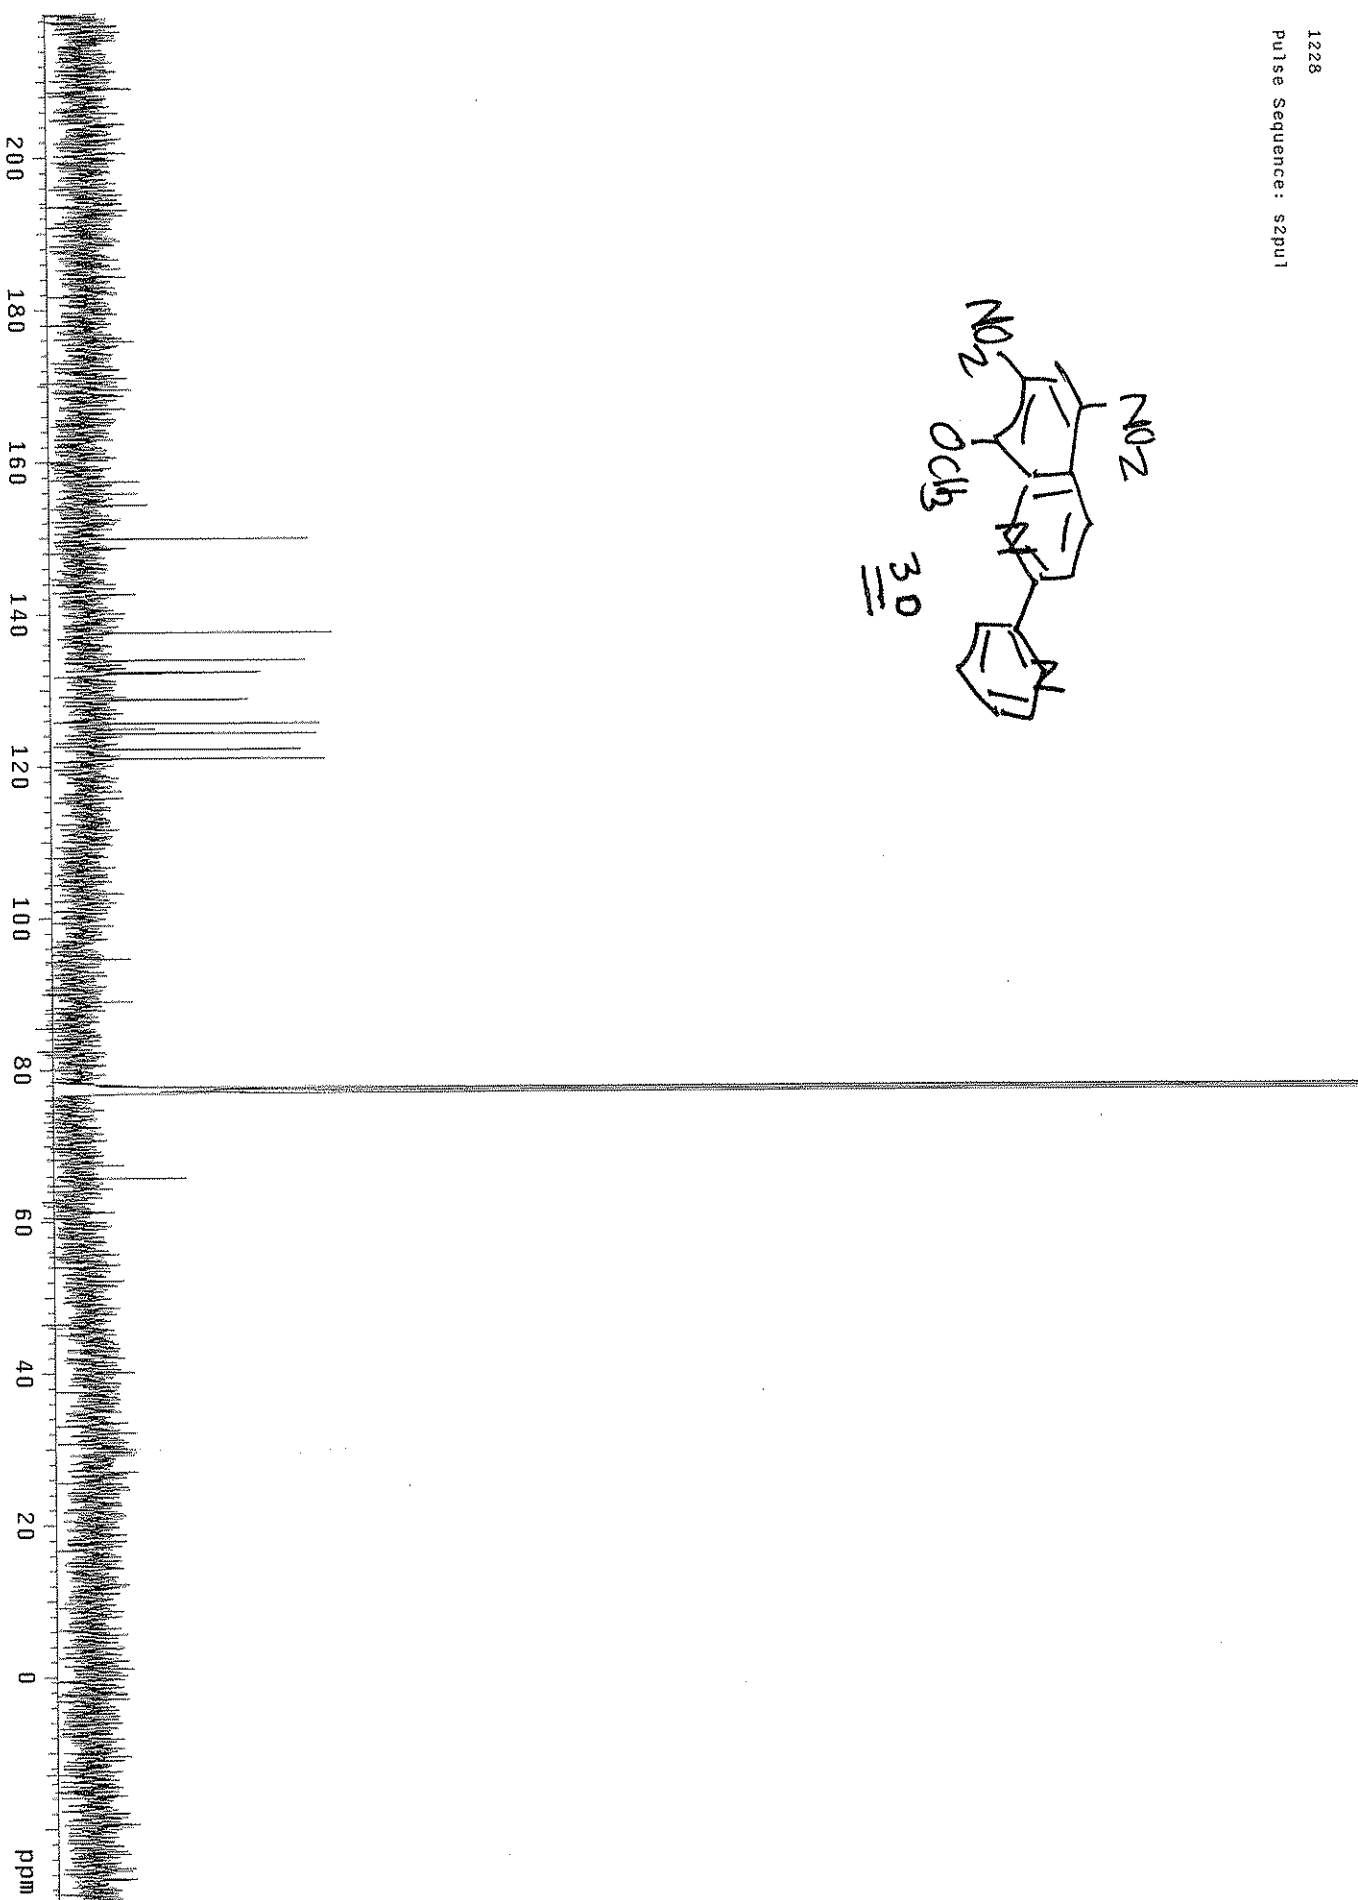

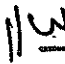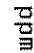

1211  
Pulse Sequence: s2pu1

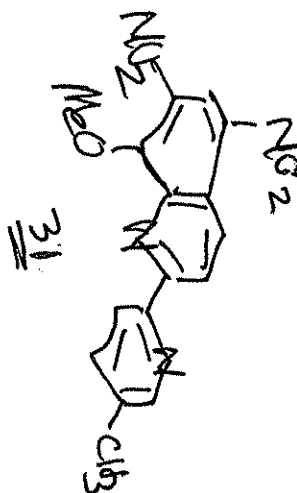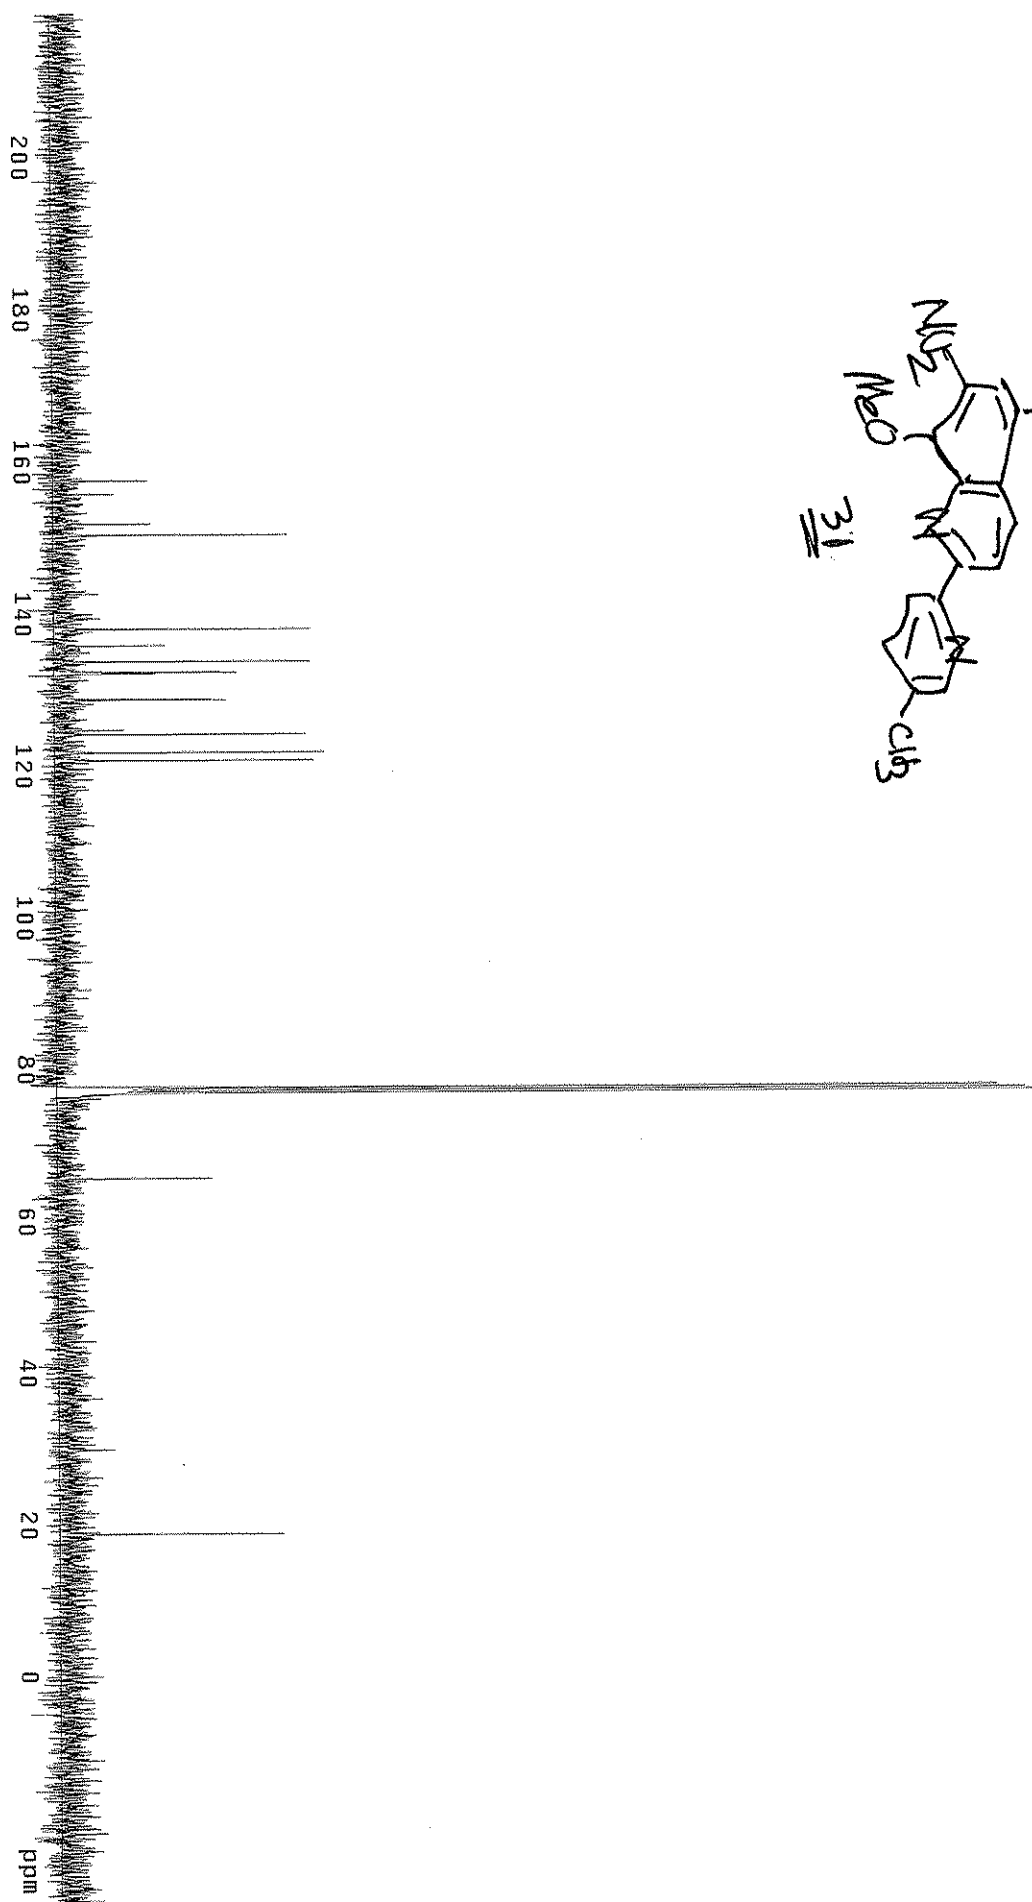



2-111

Automation directory:  
Sample id : tmpstudy

Pulse Sequence: szpu1

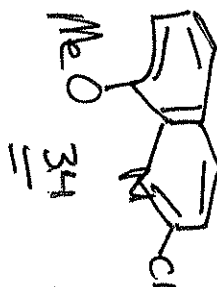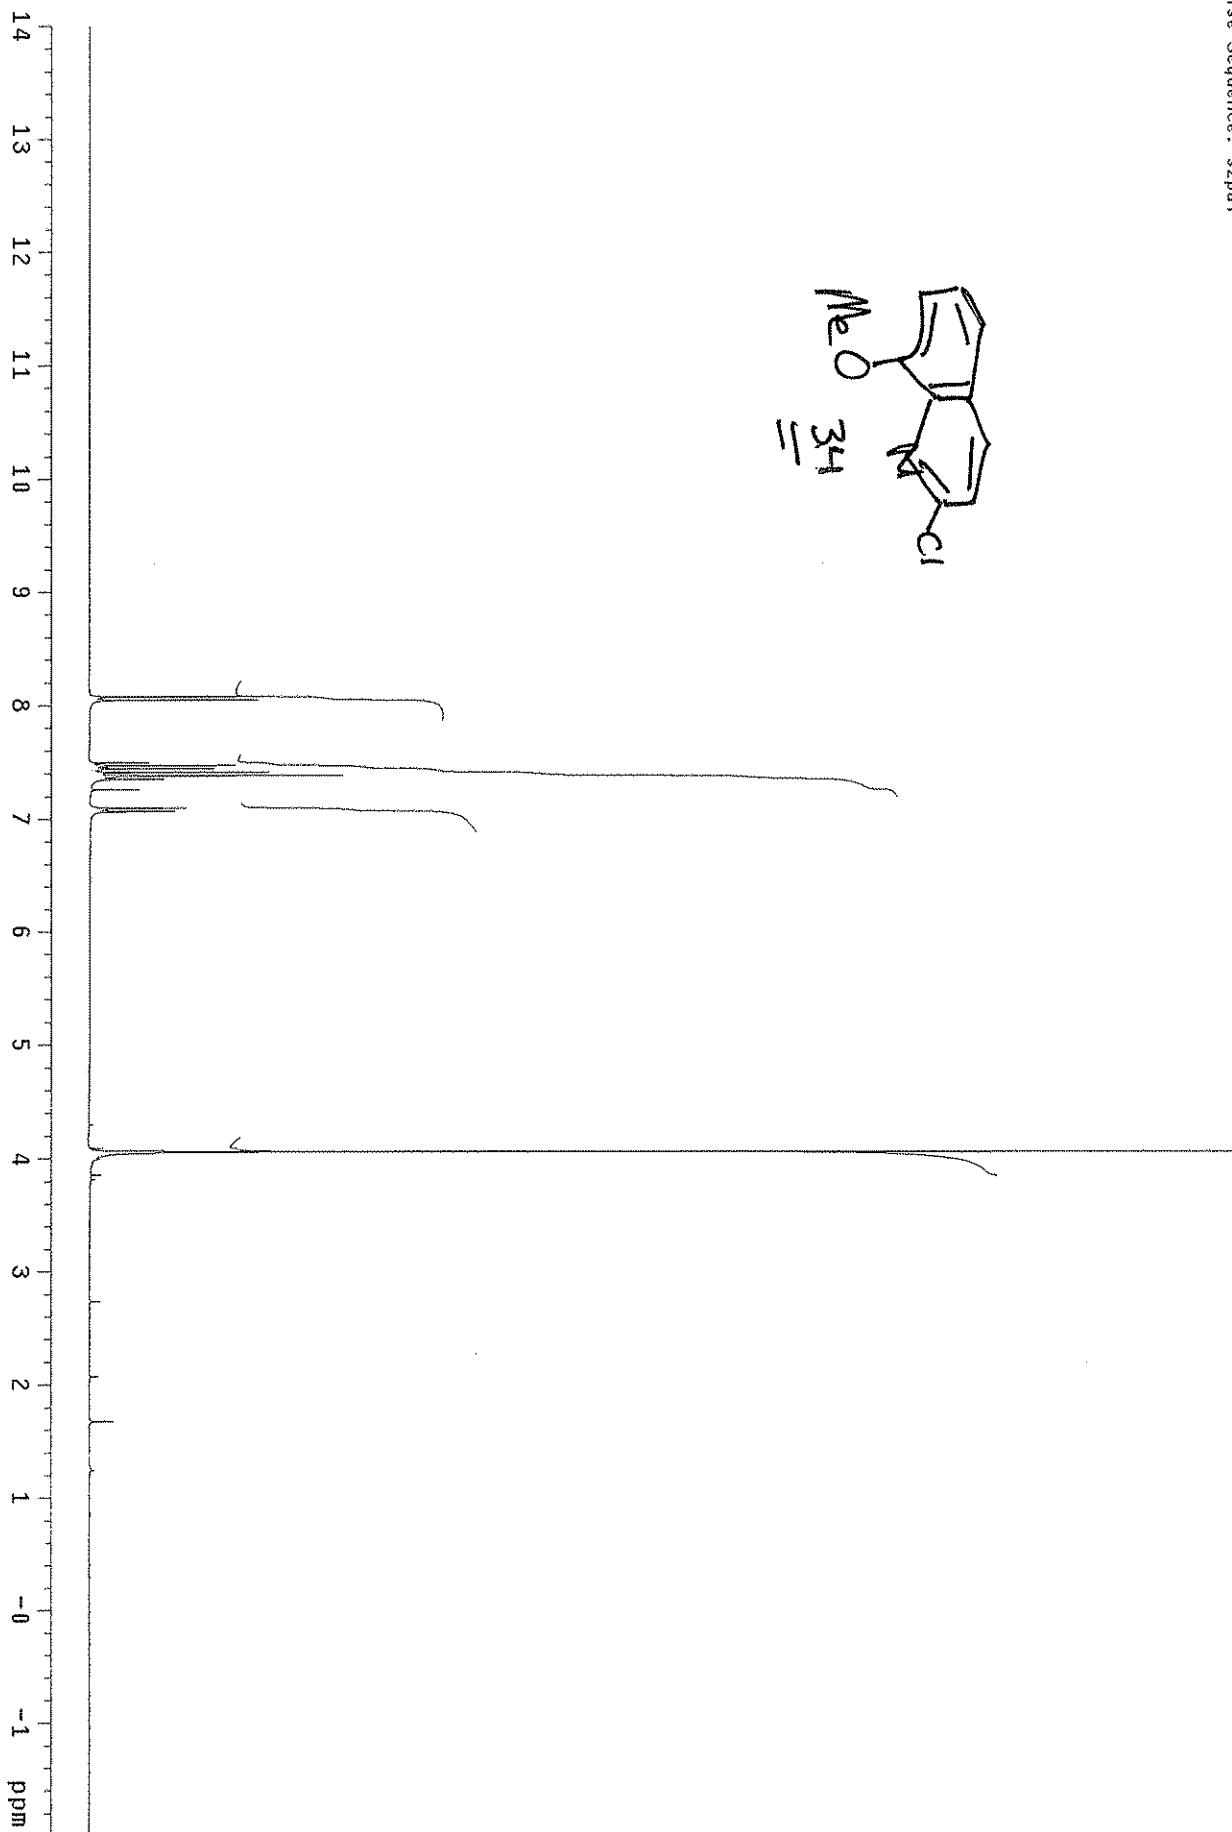

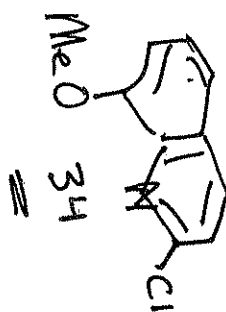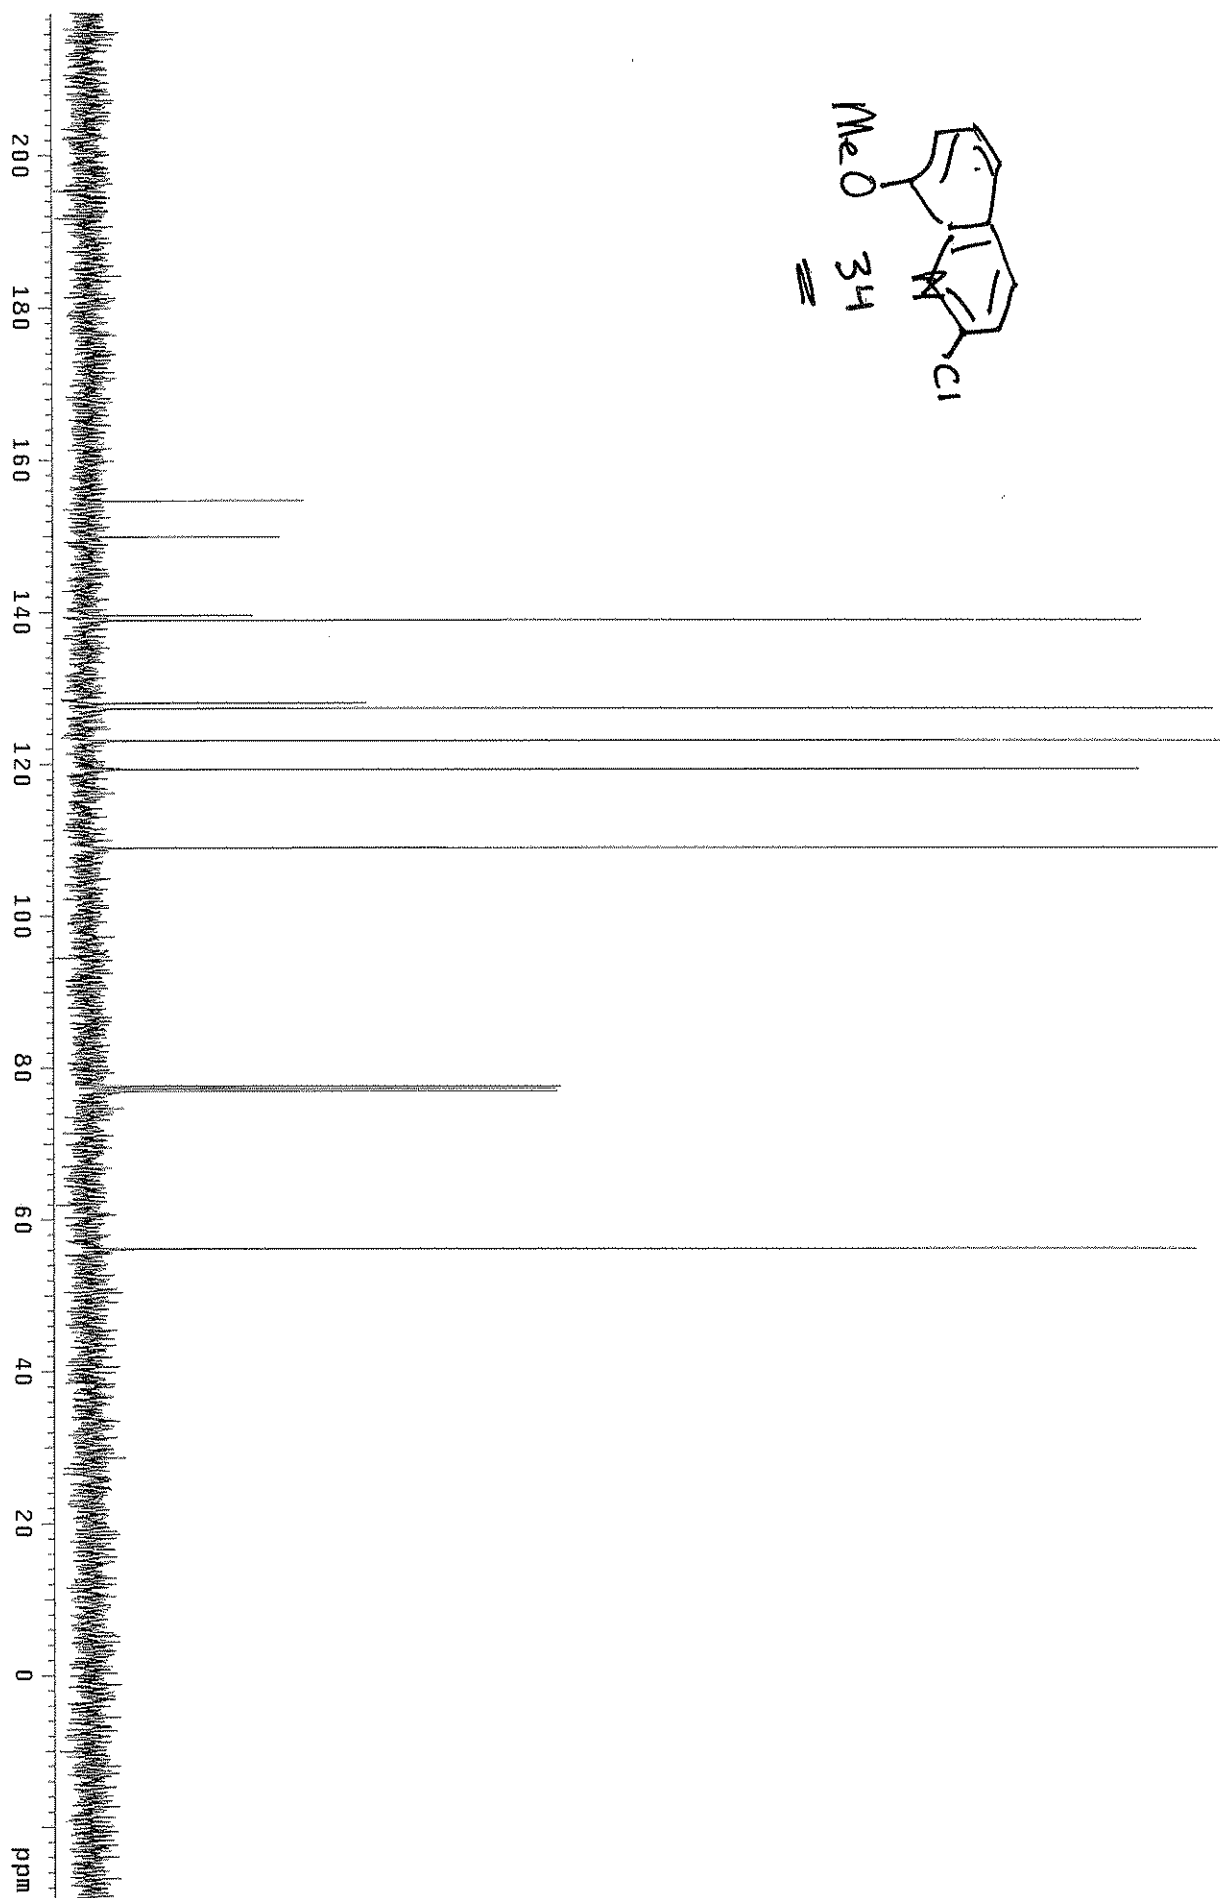

2-1137c  
Pulse Sequence: szpu1

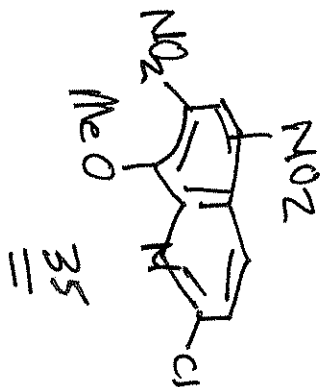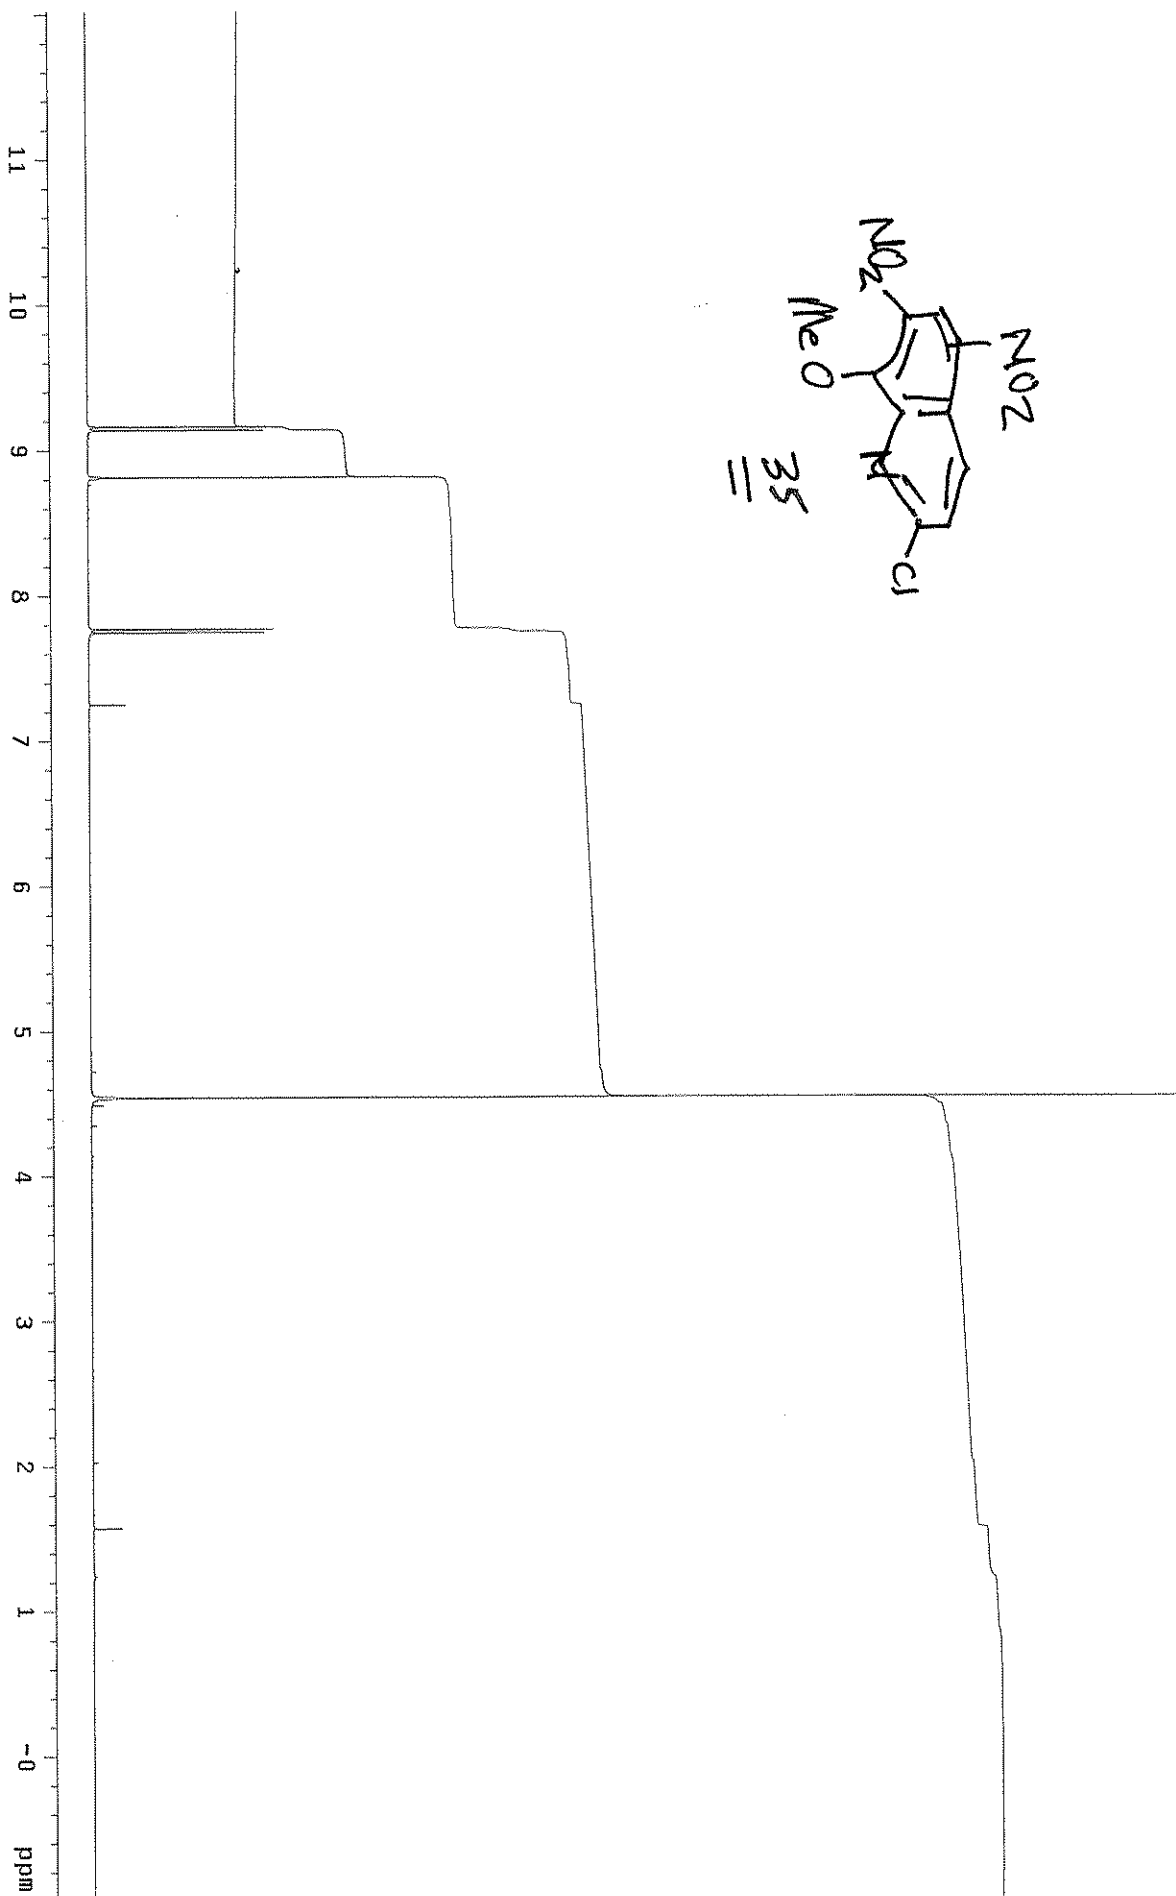

| 13C NMR | FREQUENCY | PPM     | HEIGHT |
|---------|-----------|---------|--------|
| 1       | 19564.304 | 194.544 | 8.9    |
| 2       | 19564.304 | 194.544 | 8.9    |
| 3       | 16768.046 | 166.739 | -9.1   |
| 4       | 15574.009 | 154.866 | 24.4   |
| 5       | 15351.224 | 152.650 | 22.9   |
| 6       | 14334.195 | 142.537 | 18.5   |
| 7       | 14101.491 | 140.223 | 11.4   |
| 8       | 13959.560 | 138.812 | 13.2   |
| 9       | 13665.076 | 135.883 | 103.5  |
| 10      | 12867.760 | 127.955 | 128.5  |
| 11      | 12435.180 | 123.654 | 31.2   |
| 12      | 12217.736 | 121.491 | 124.8  |
| 13      | 7874.952  | 78.307  | -9.3   |
| 14      | 7798.656  | 77.549  | 150.0  |
| 15      | 7766.611  | 77.230  | 146.3  |
| 16      | 7735.330  | 76.919  | 138.0  |
| 17      | 6592.412  | 65.554  | 76.2   |
| 18      | 5306.820  | 52.770  | -9.8   |
| 19      | 2010.058  | 19.988  | 9.3    |
| 20      | 1284.480  | 12.773  | 8.7    |
| 21      | -1546.112 | -15.374 | 9.5    |
| 22      | -1733.038 | -17.233 | 9.1    |
| 23      | -1823.830 | -18.136 | 9.0    |
| 24      | -2193.104 | -21.808 | -9.3   |

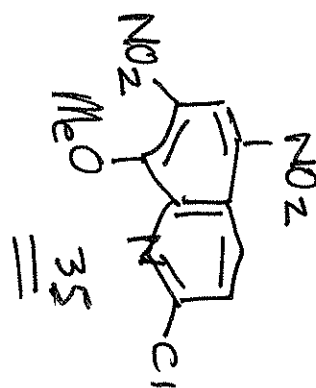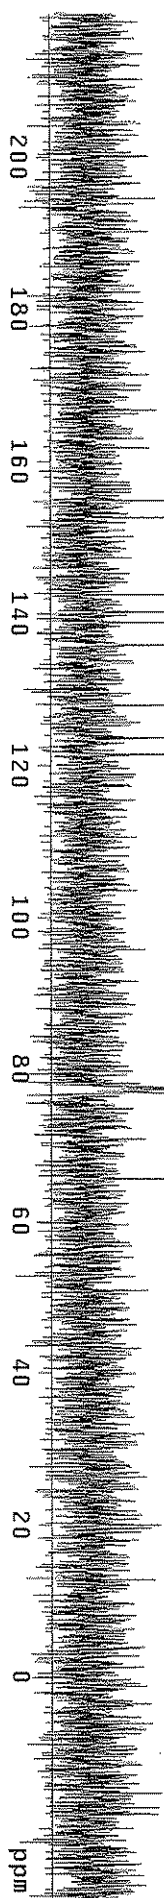

47  
Pulse Sequence: s2pu1

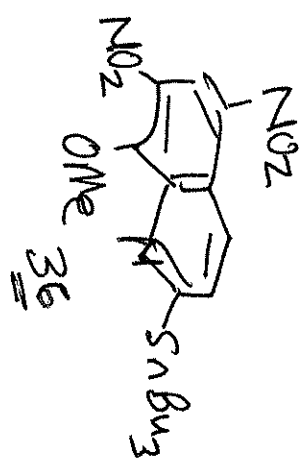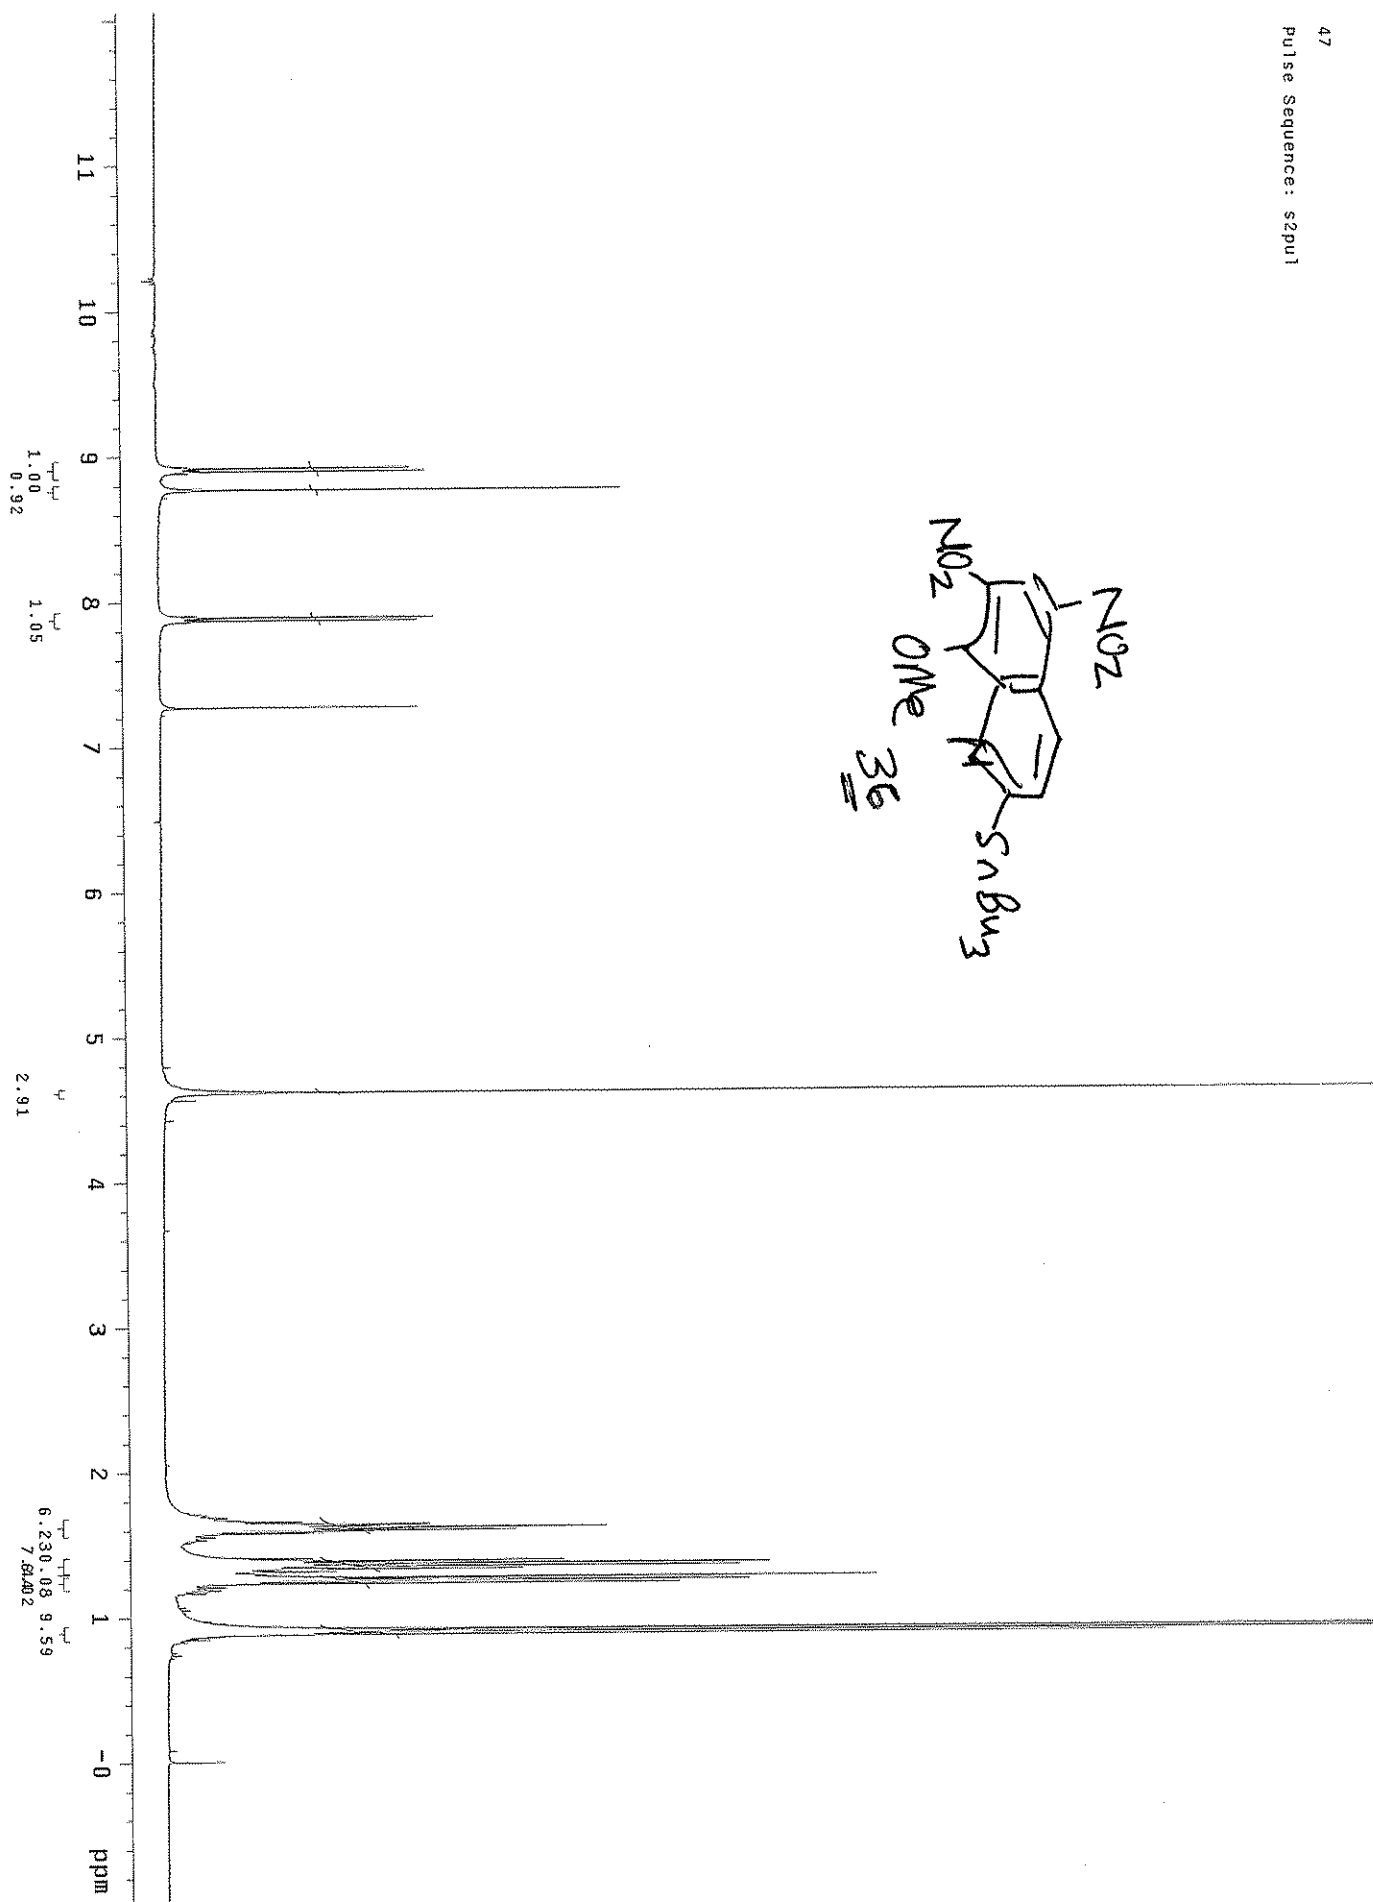

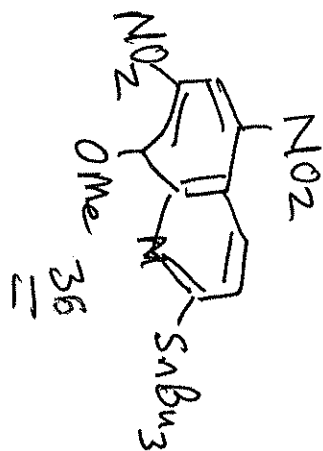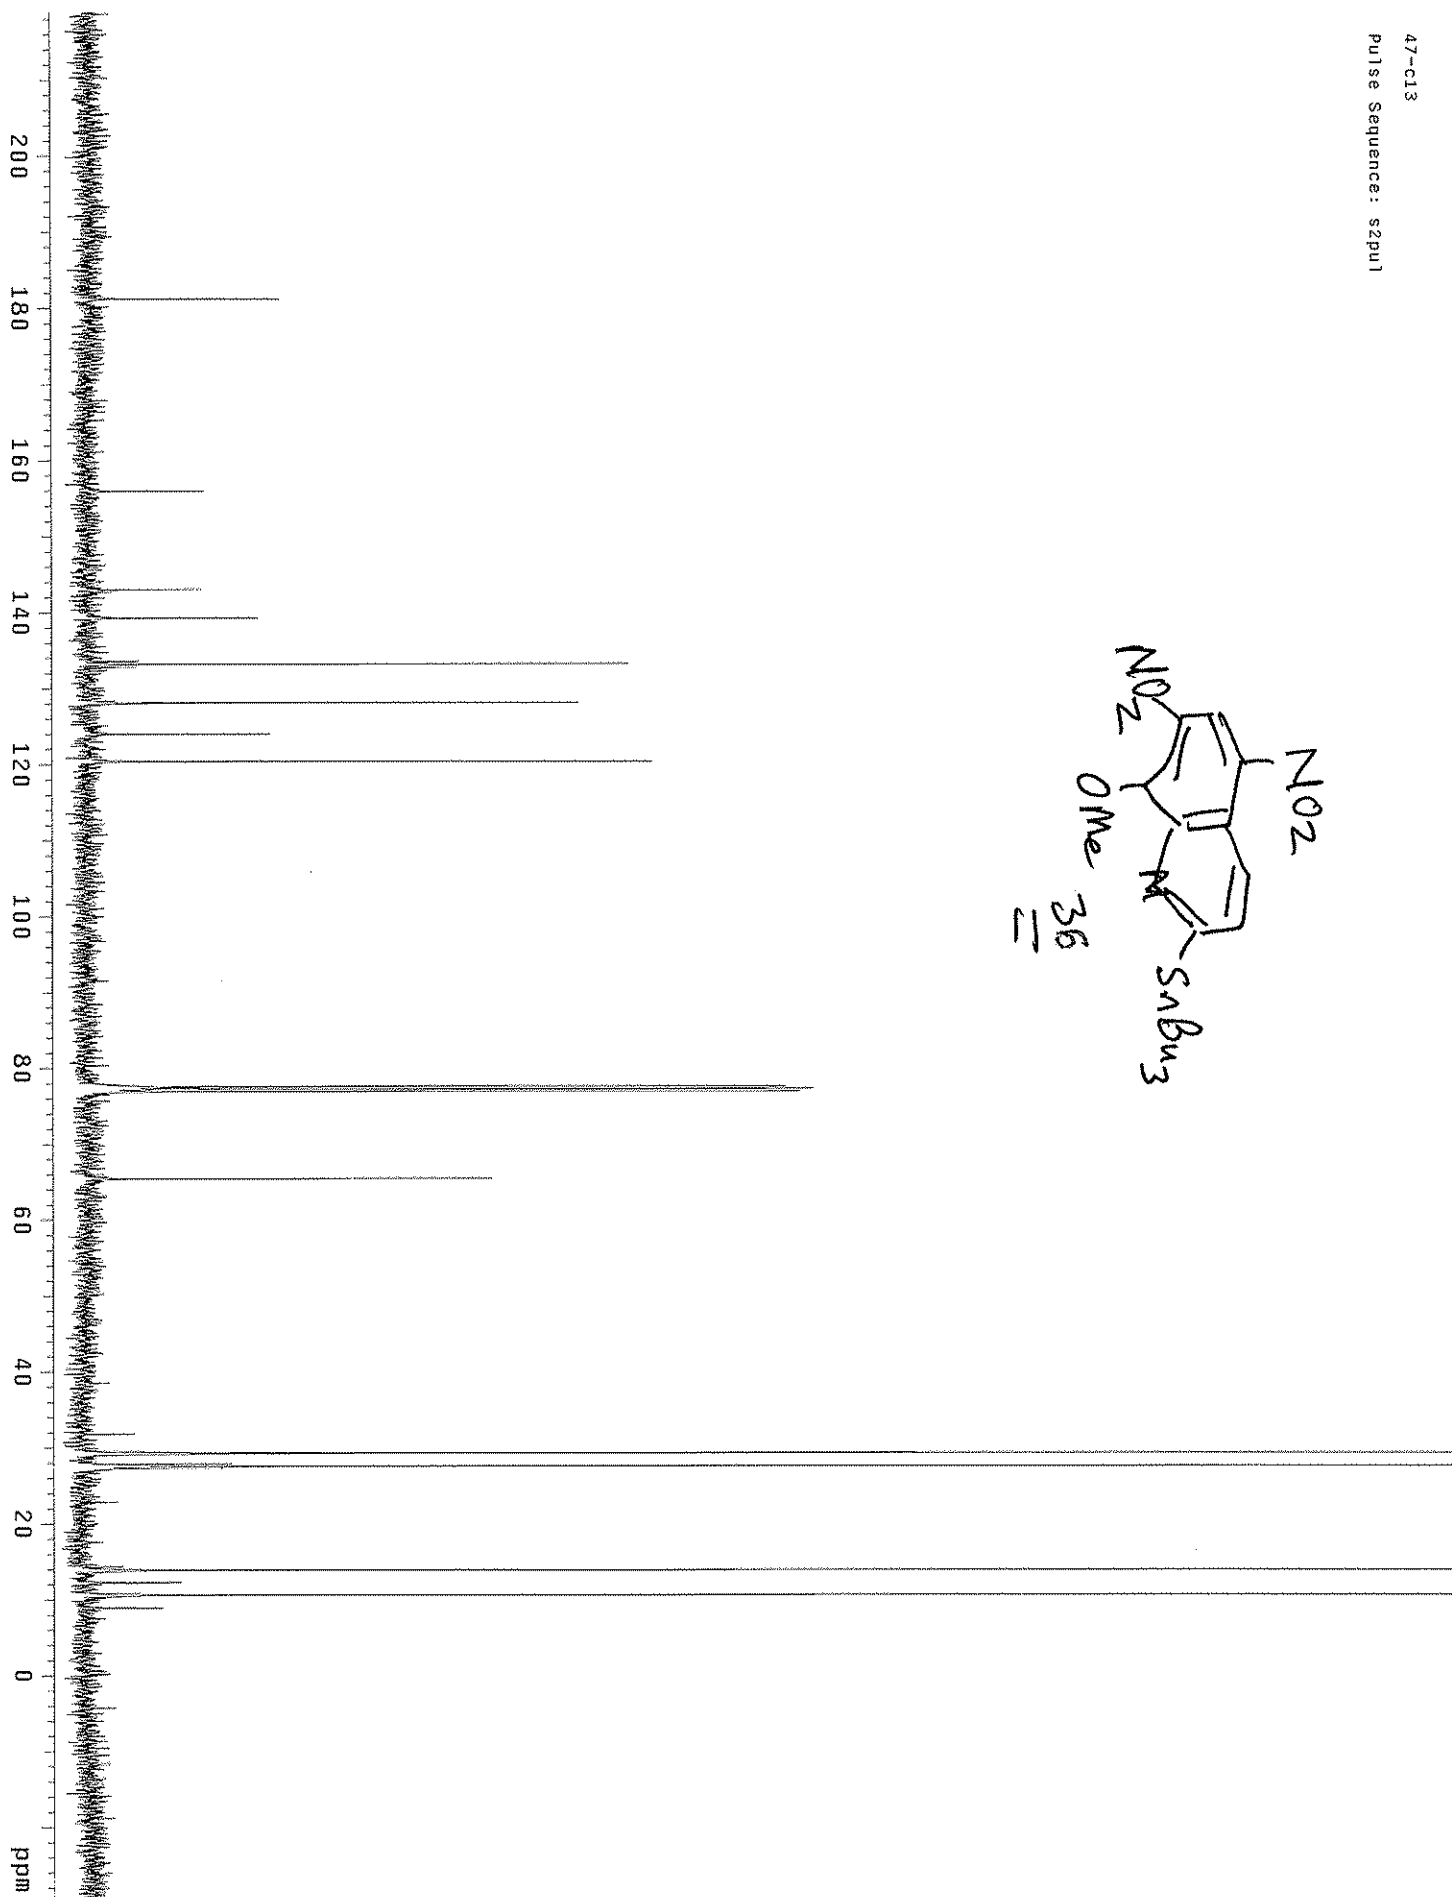

311a

Pulse Sequence: szpu1

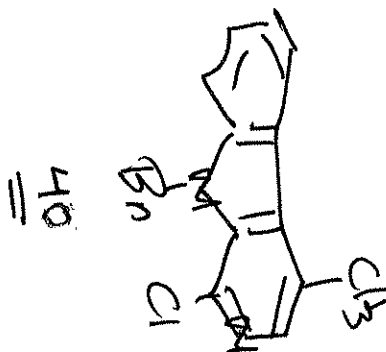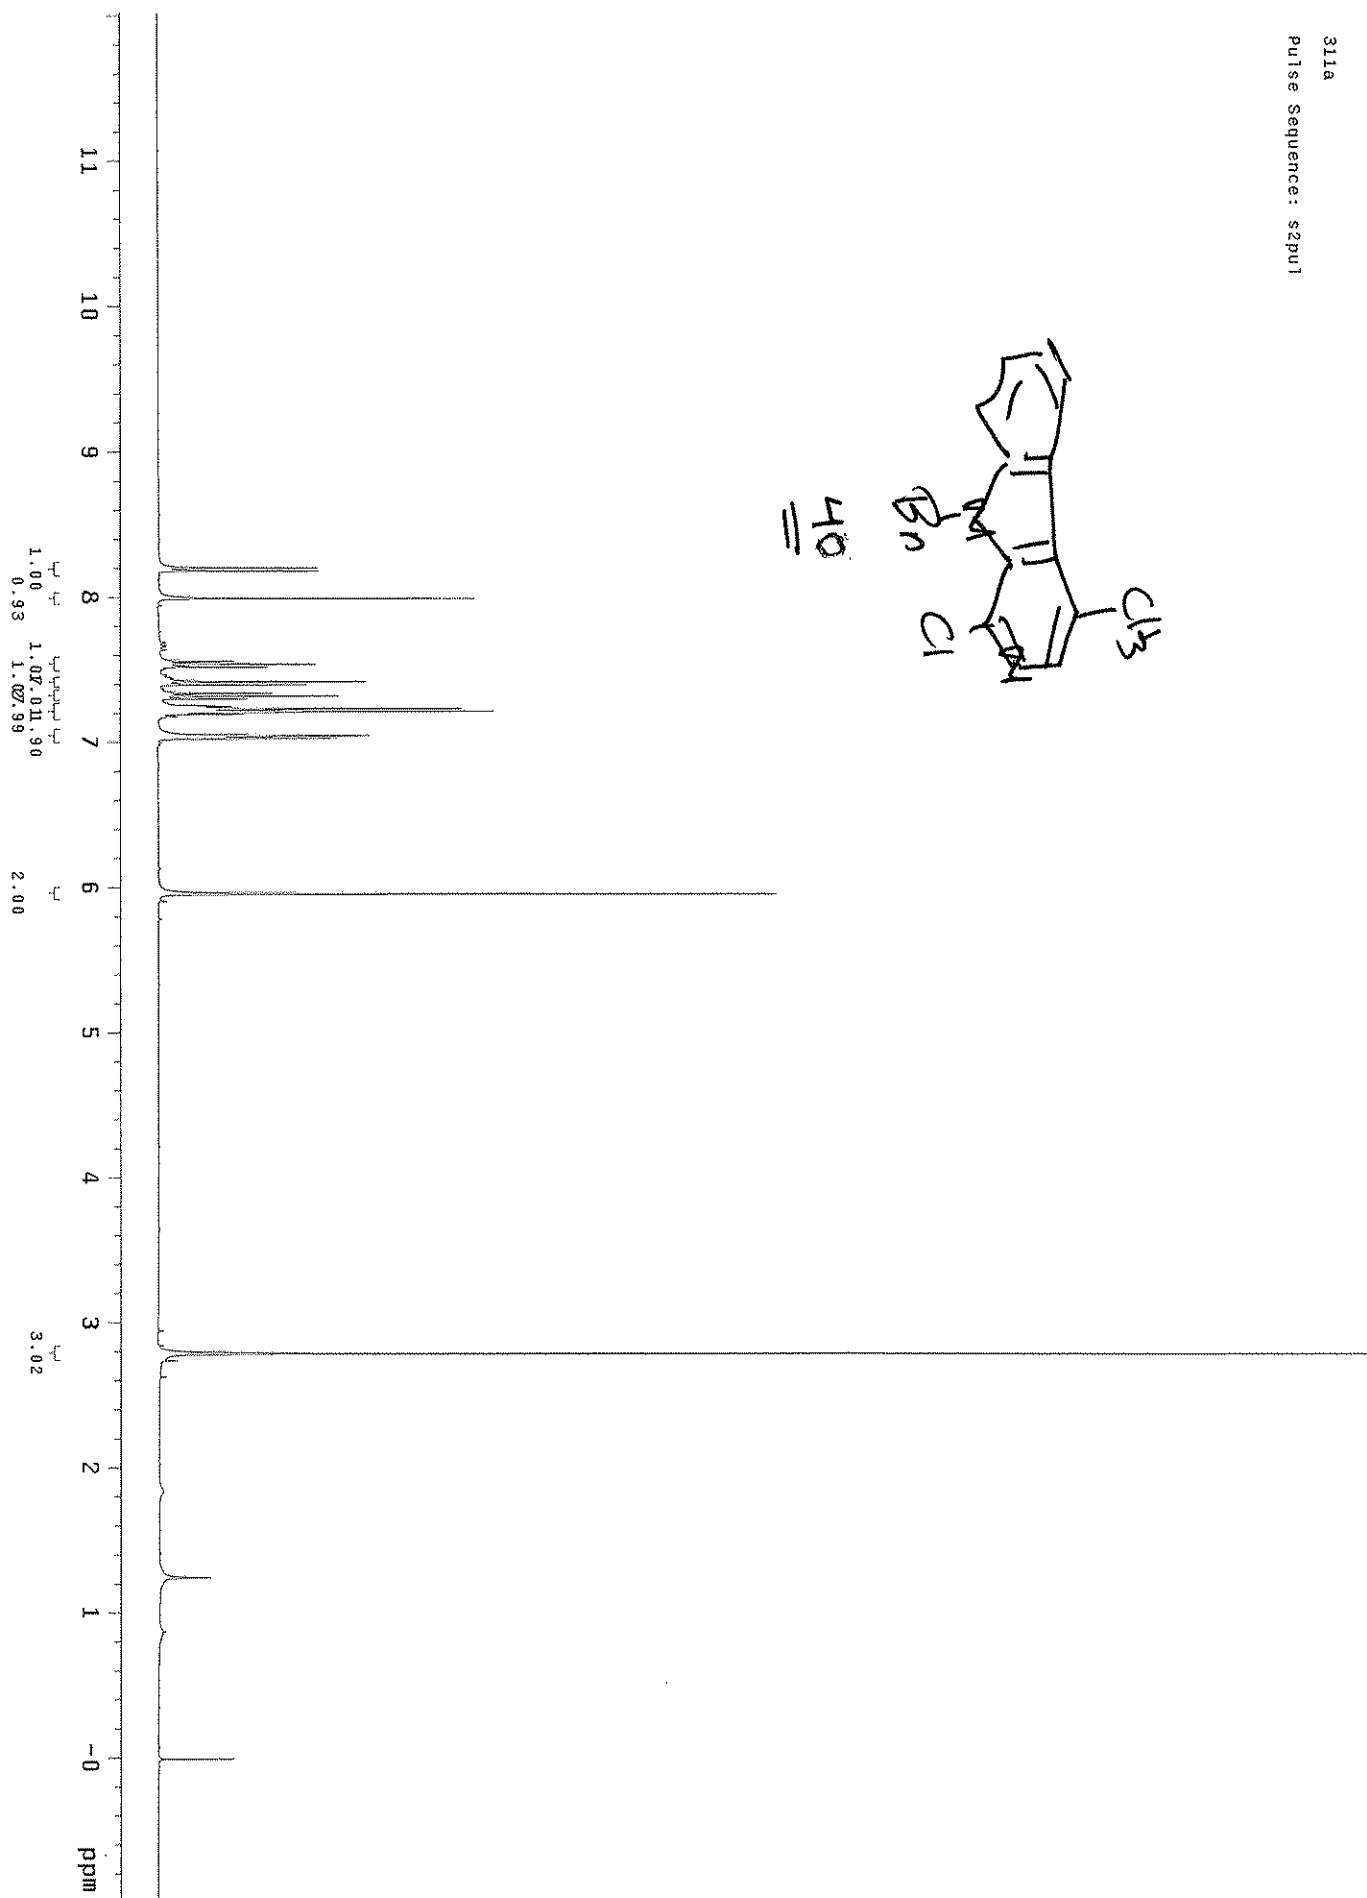

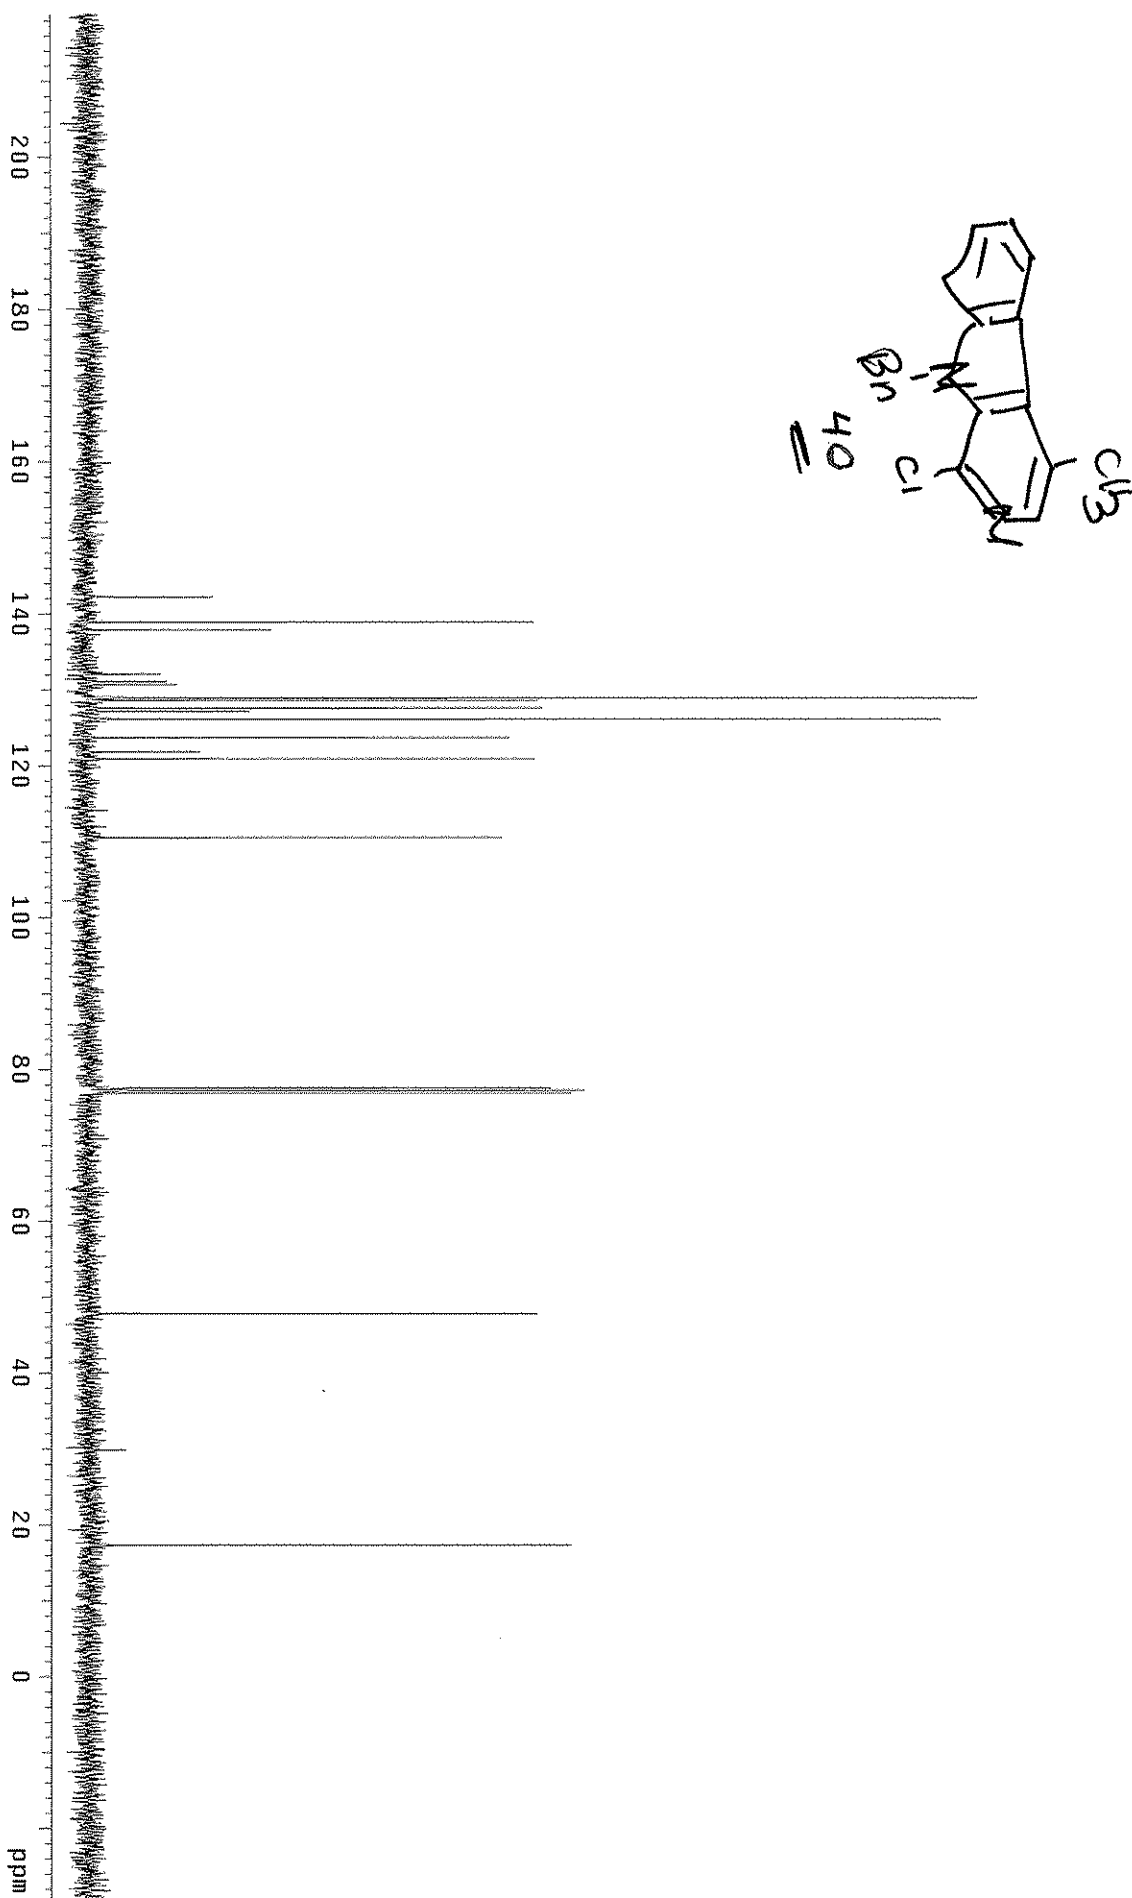



413-h  
Pulse Sequence: s2pu1

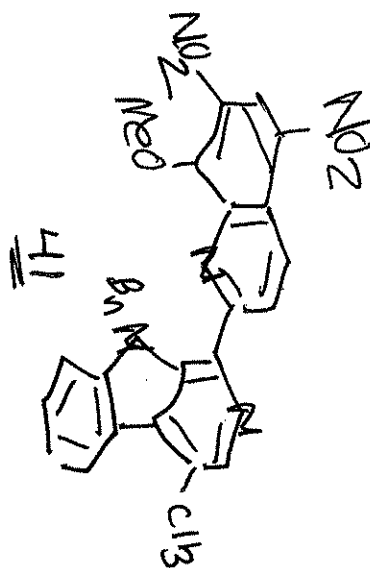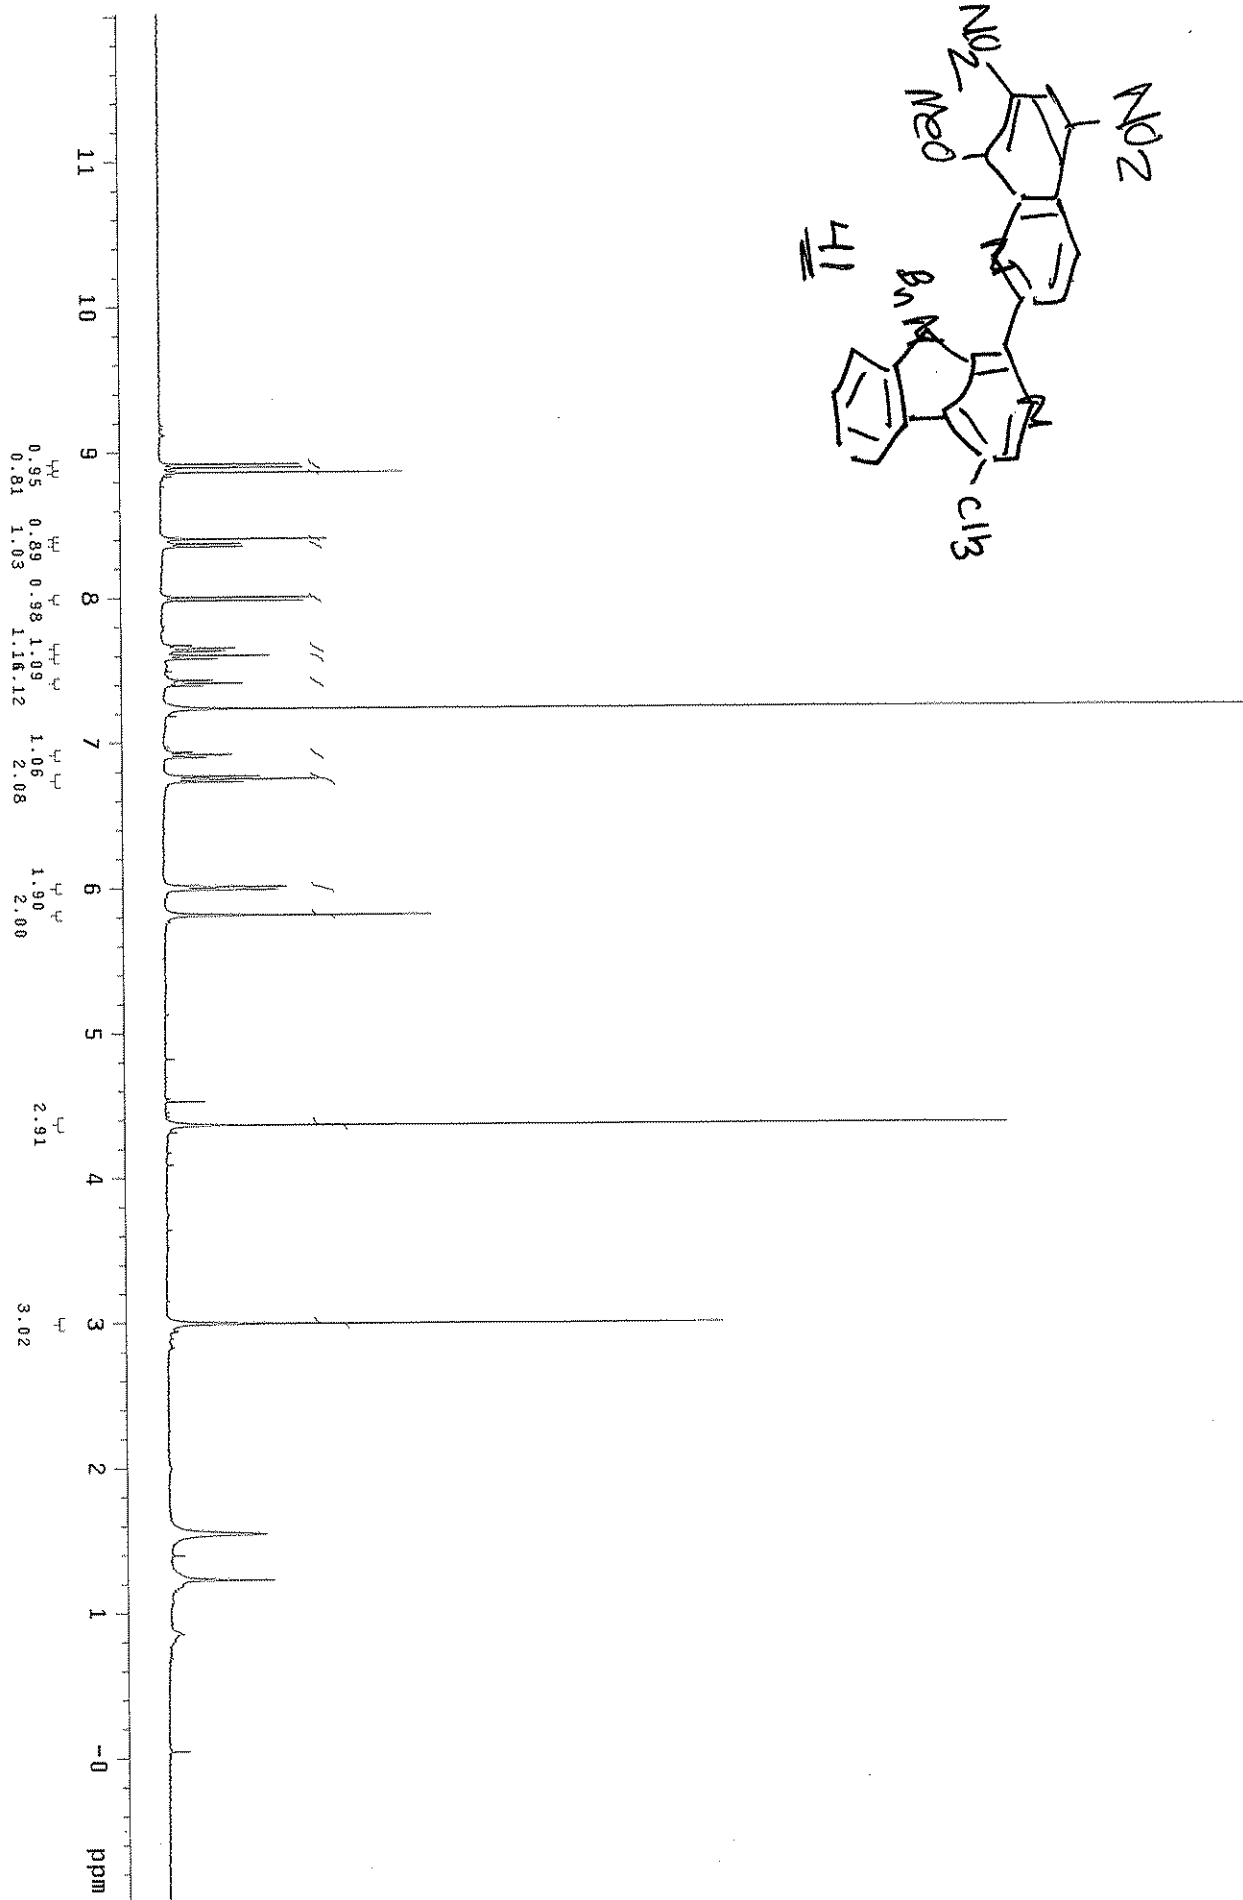

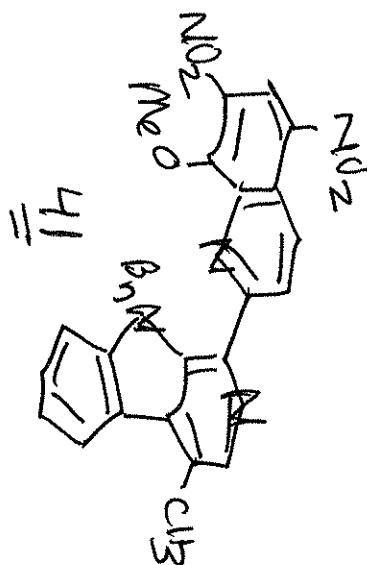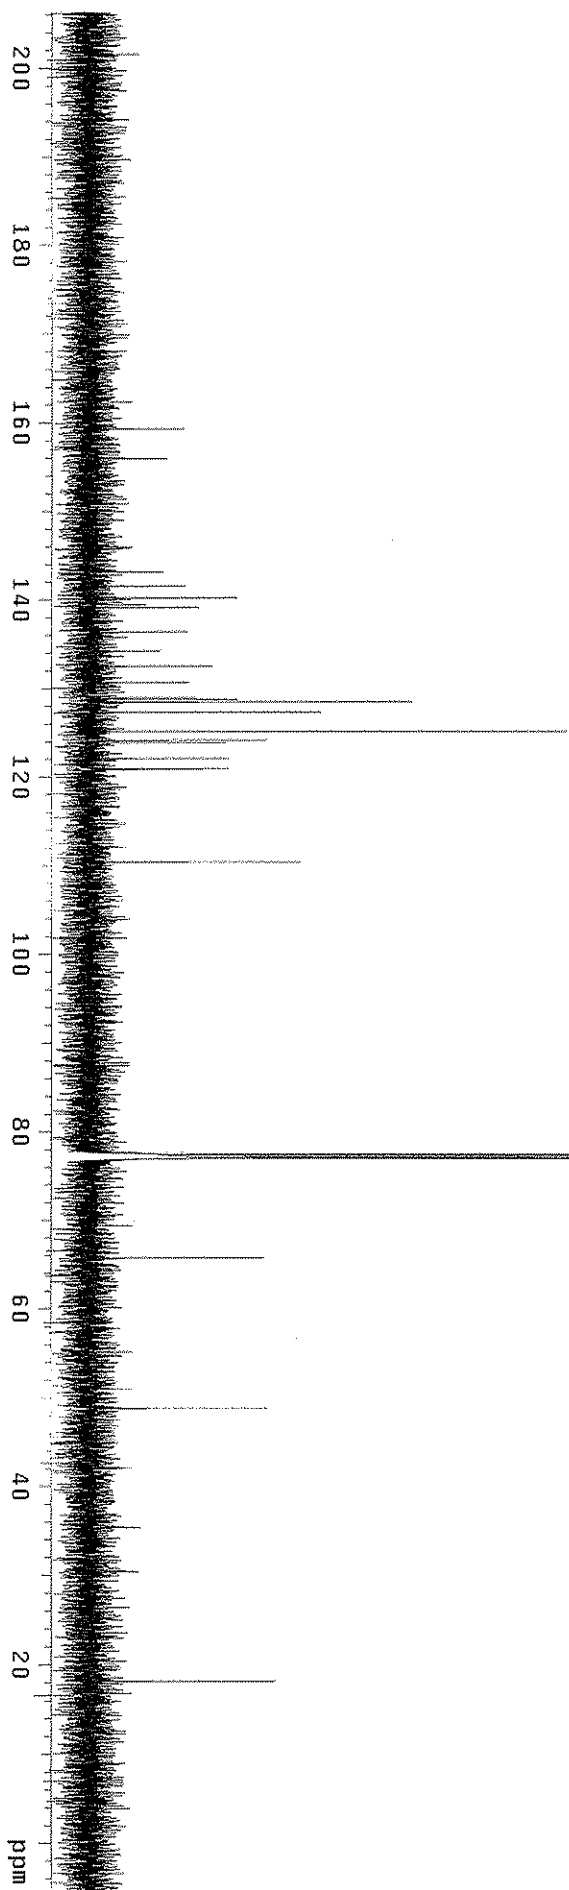

47-1-h  
Pulse Sequence: s2pu1

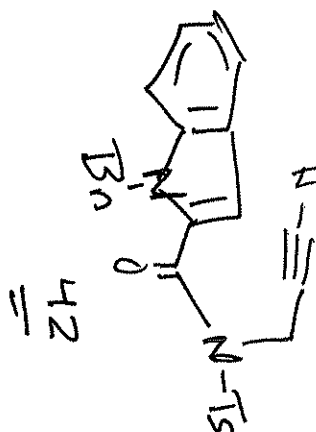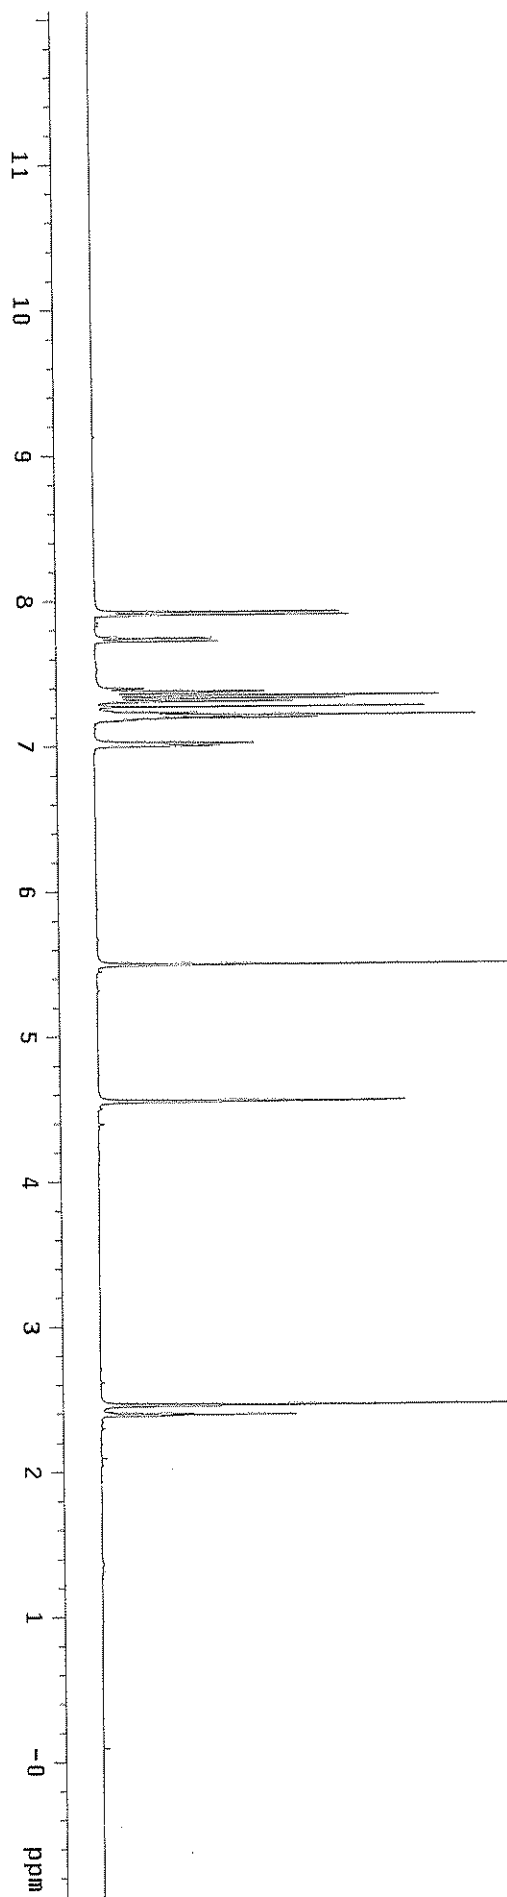

0130-cl3  
Pulse Sequence: szpu1

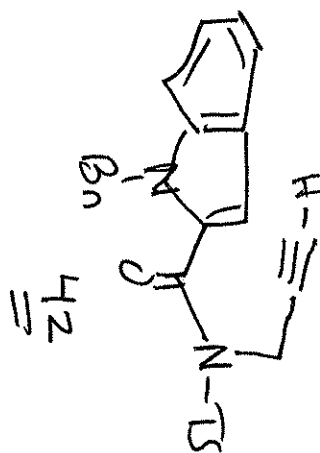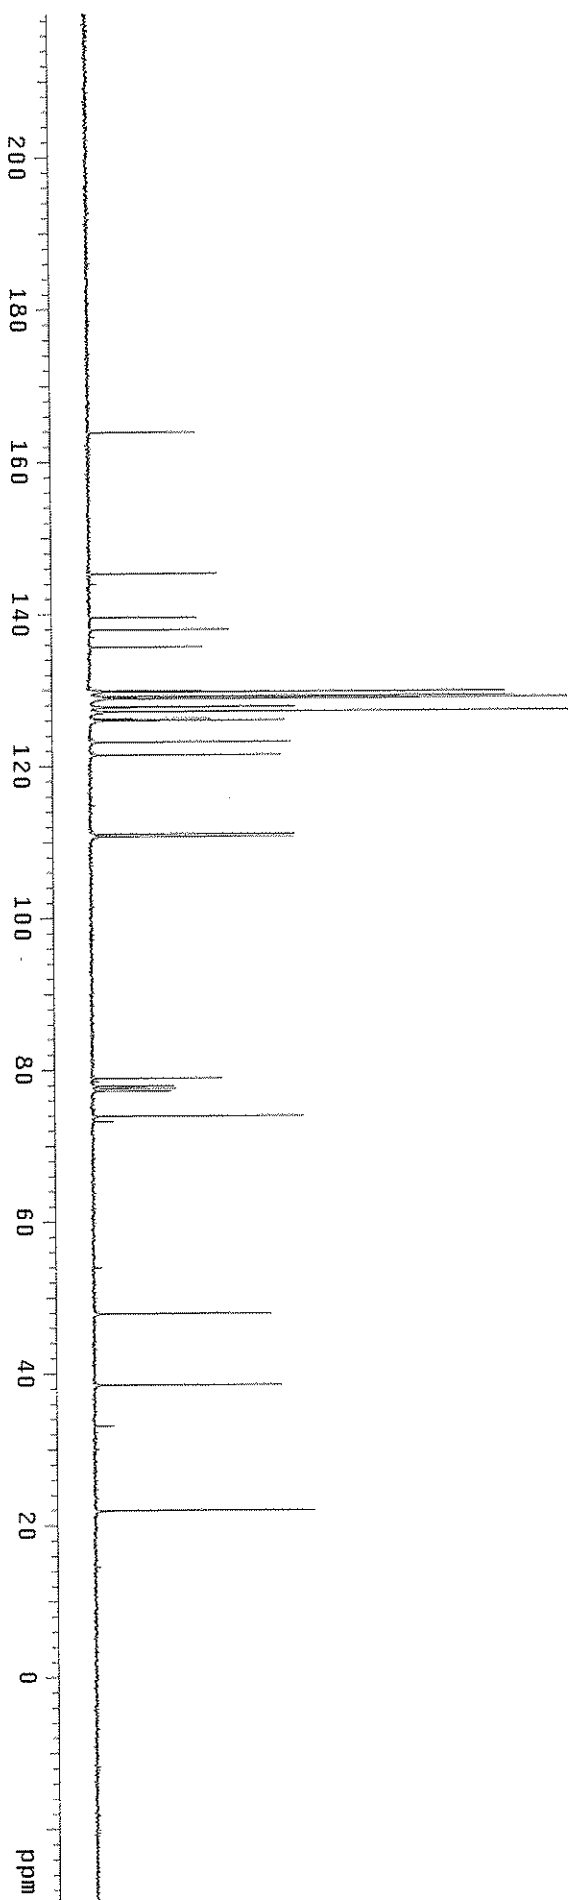

0130B  
Pulse Sequence: szpu1

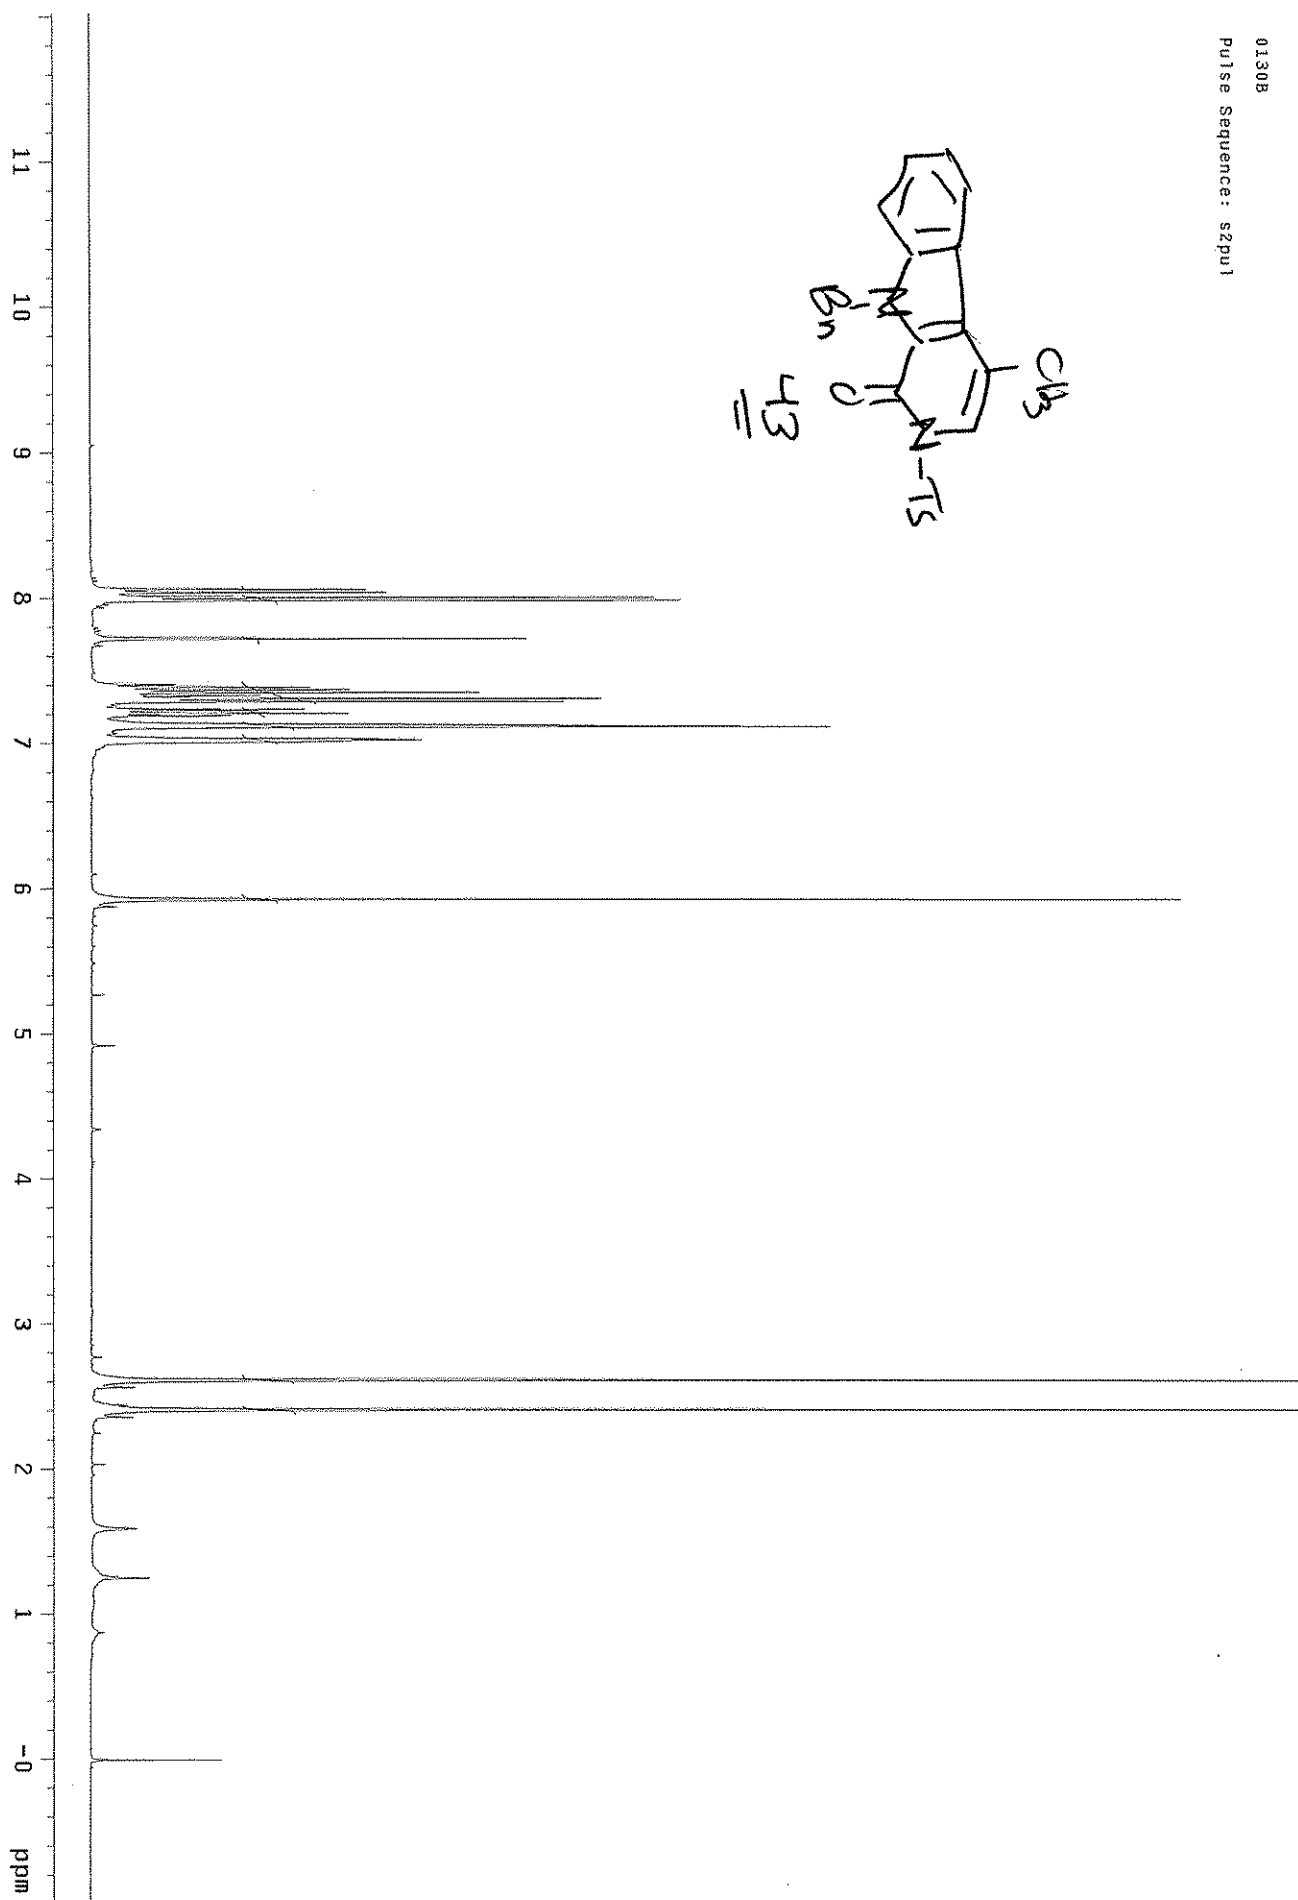

0130B-C13  
Pulse Sequence: szpu1

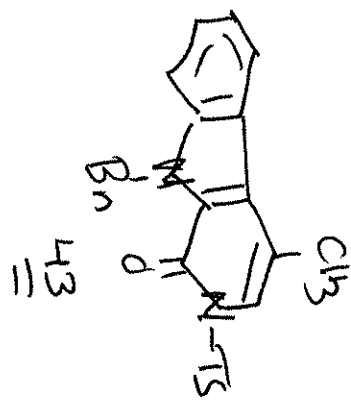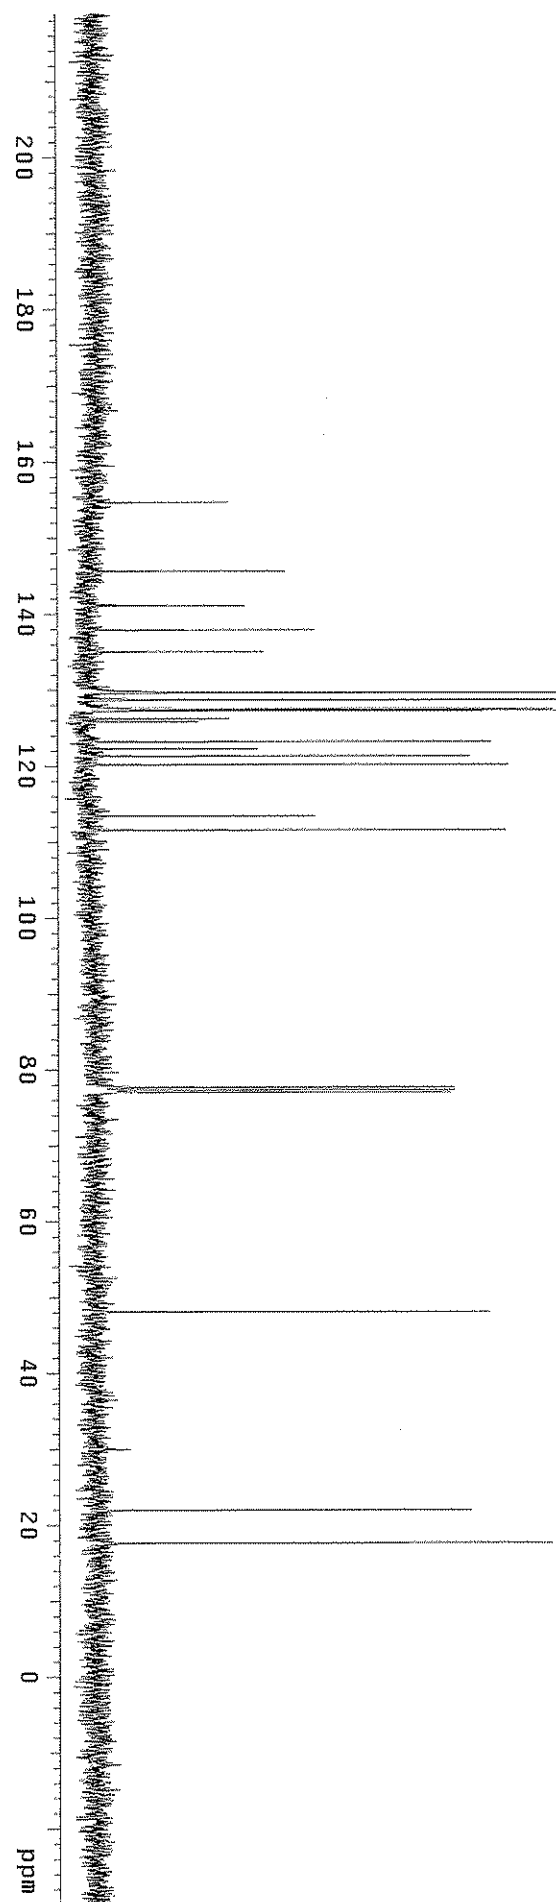

211A-DMSO-h  
Pulse Sequence: s2pu1

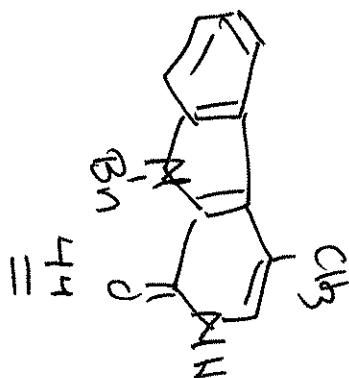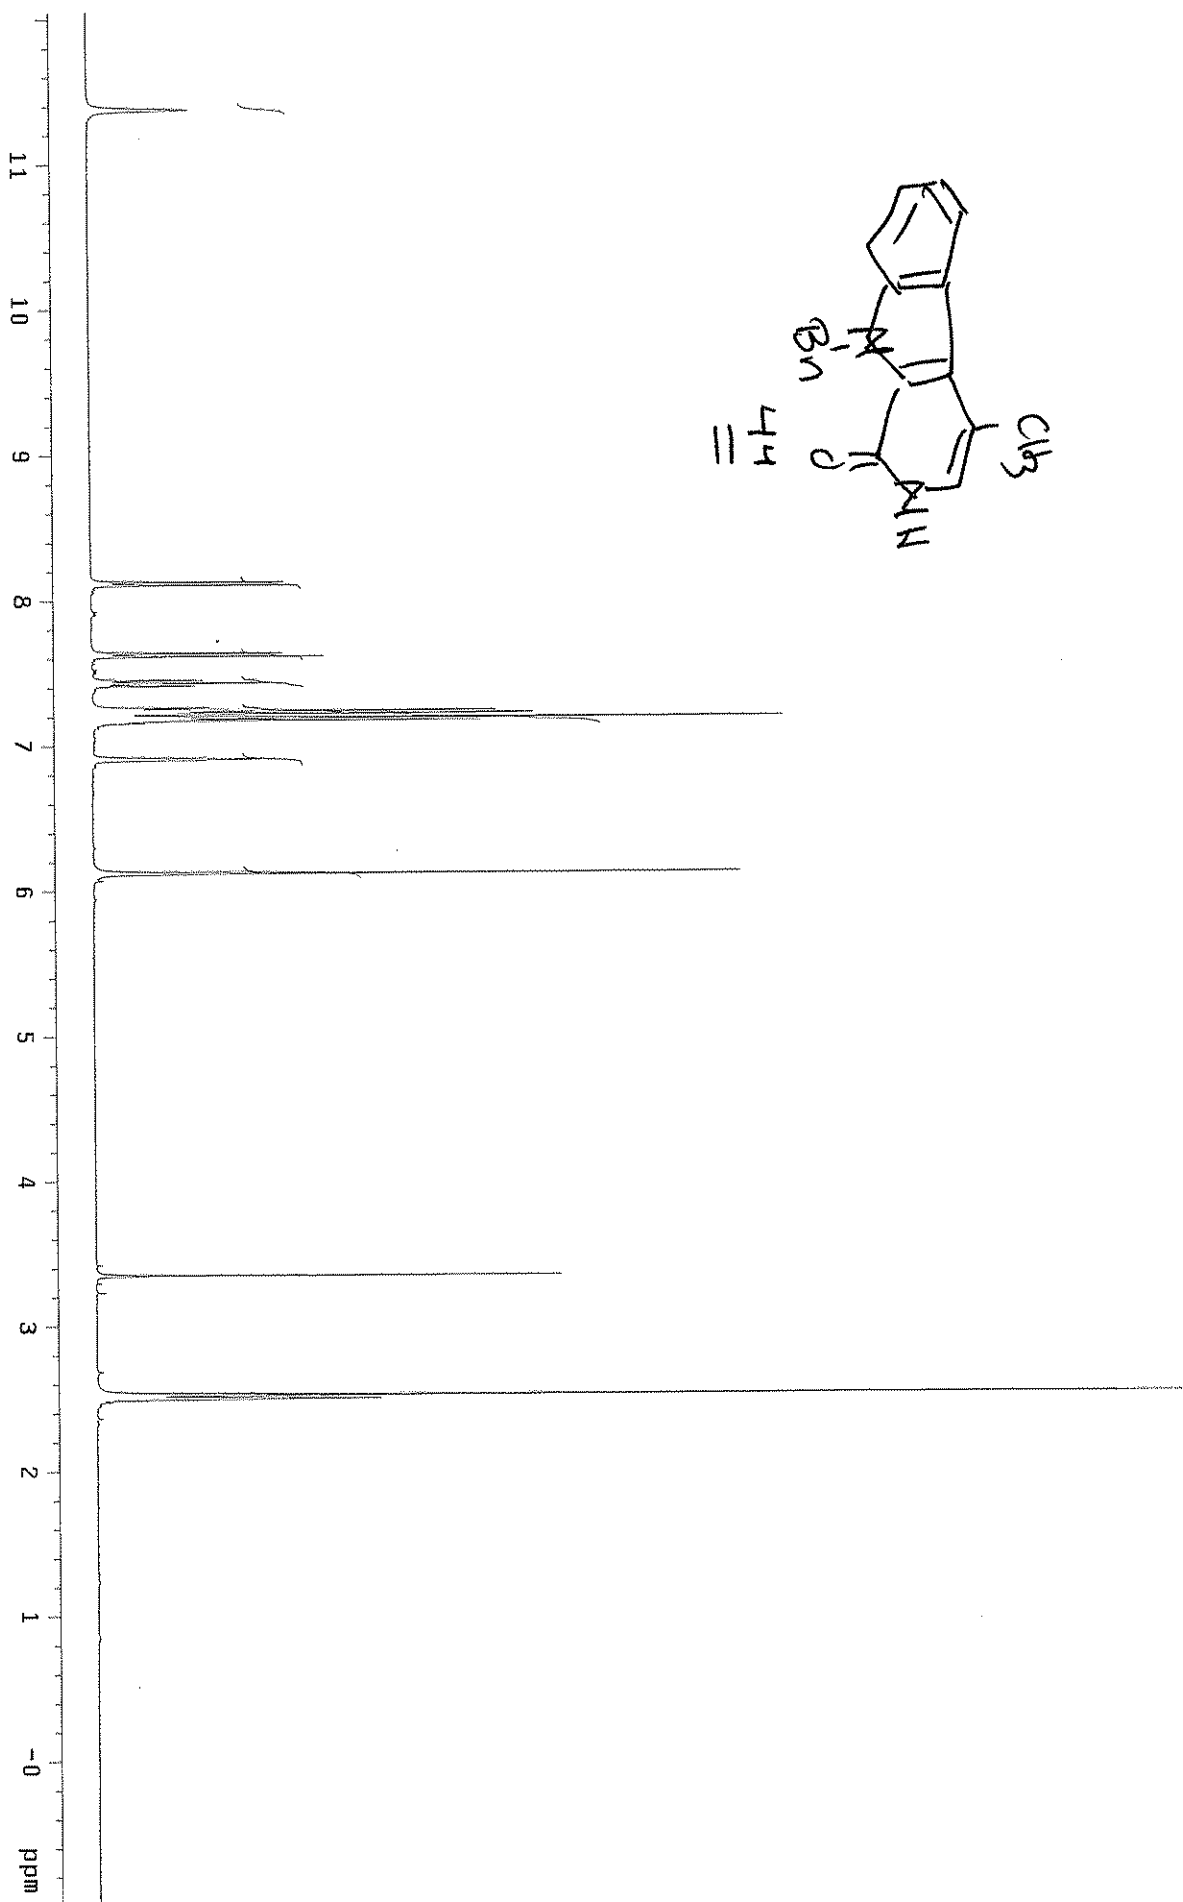

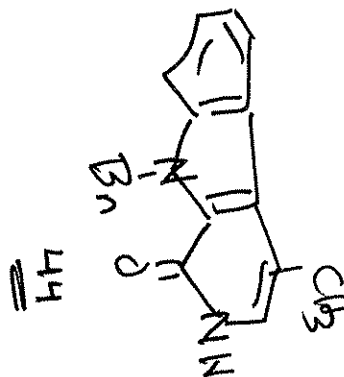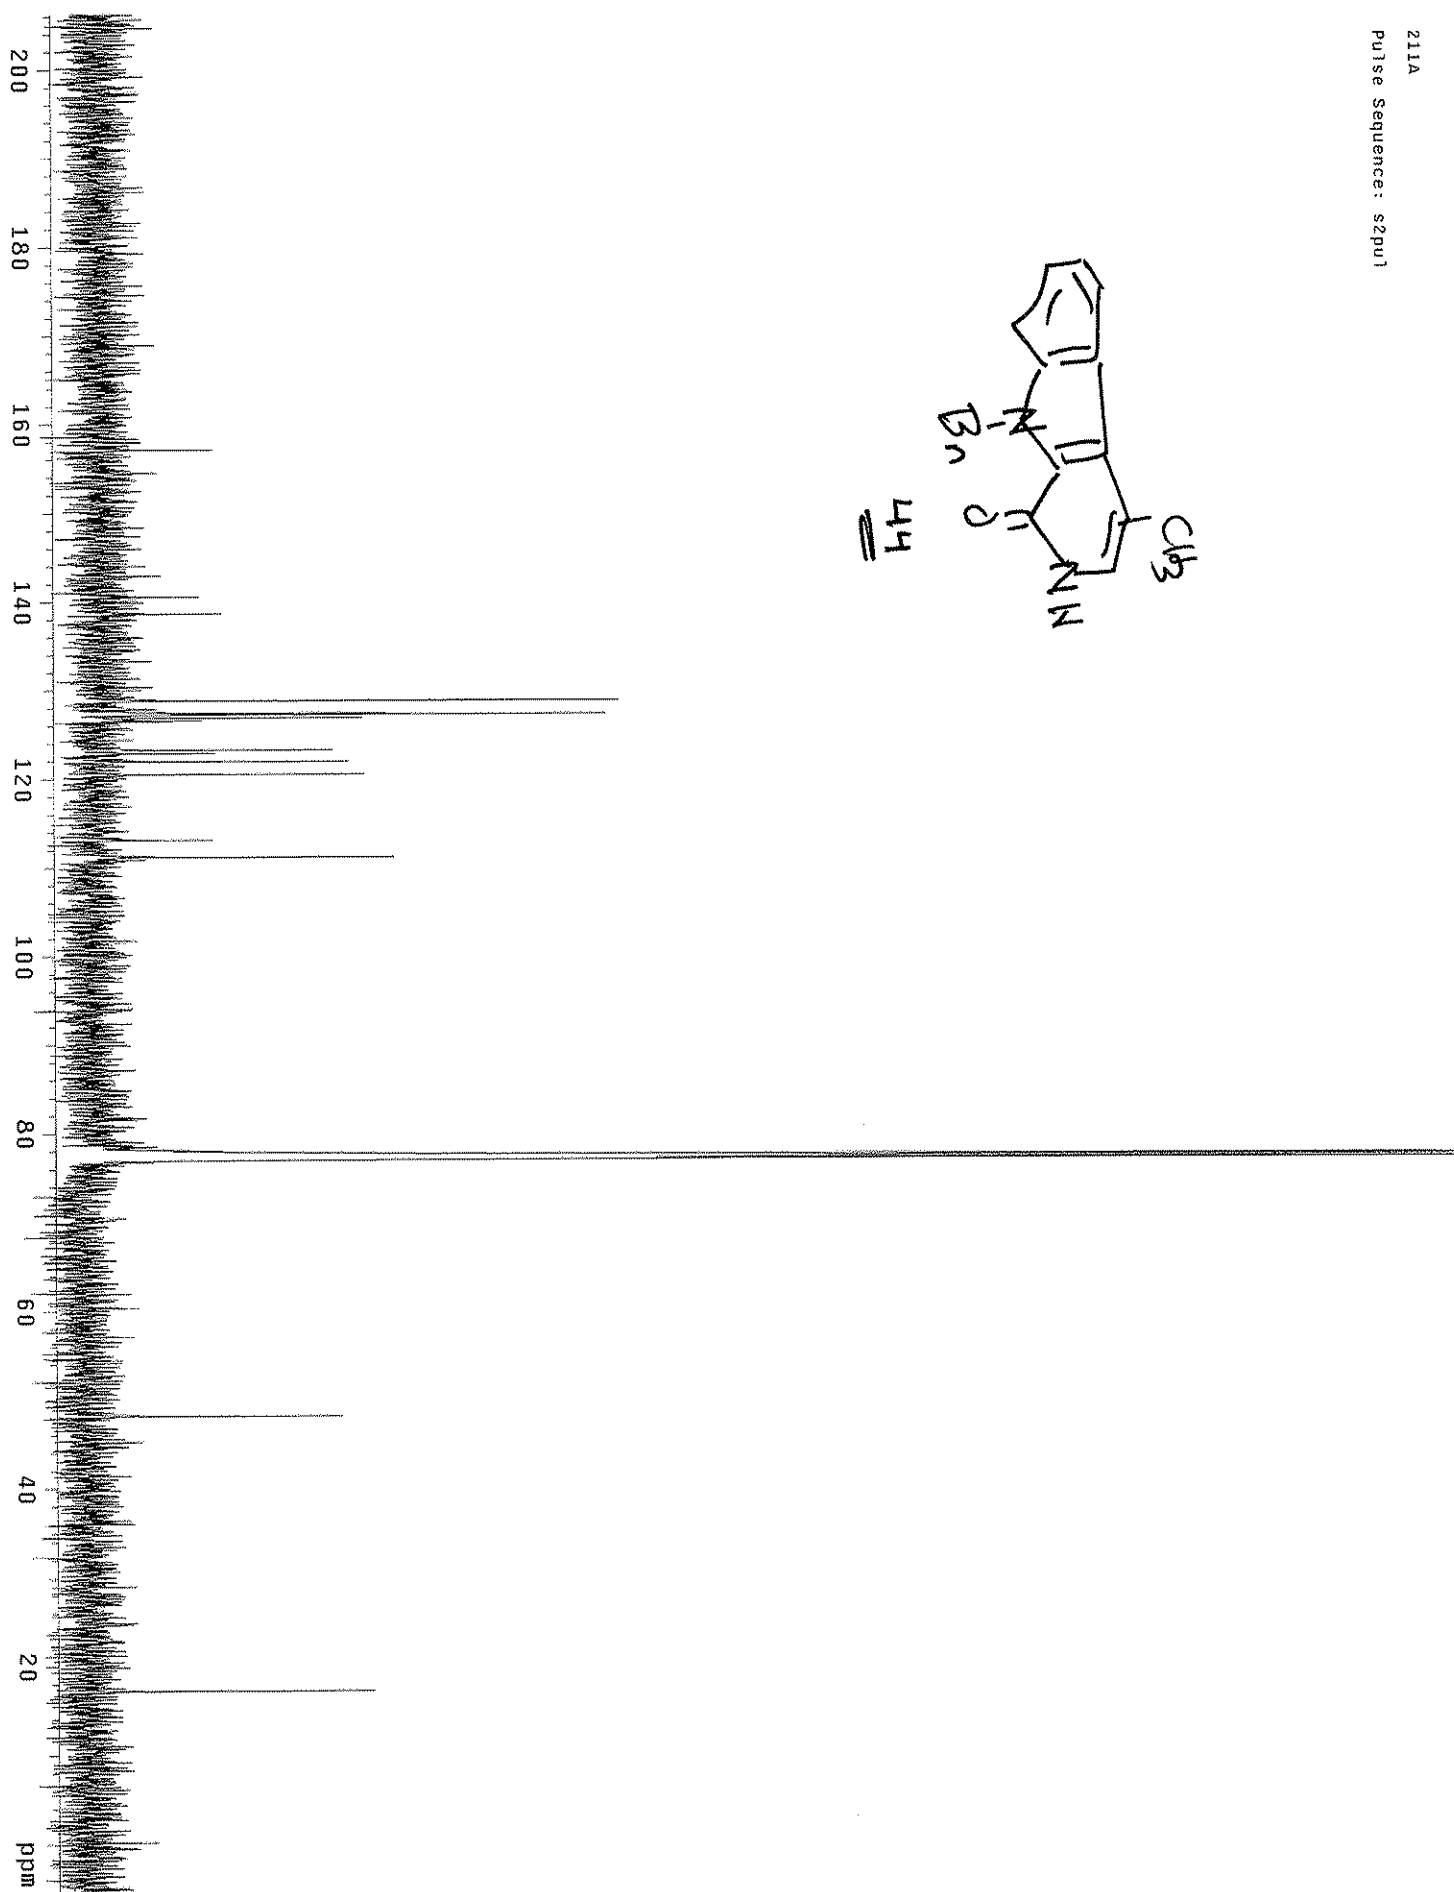



STANDARD 1H OBSERVE  
2-60  
Pulse Sequence: s2pu1

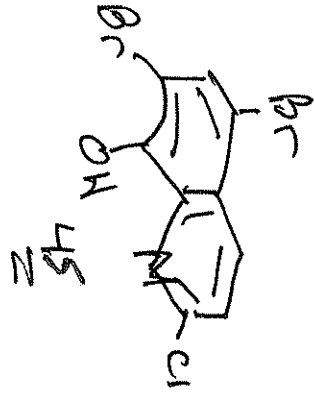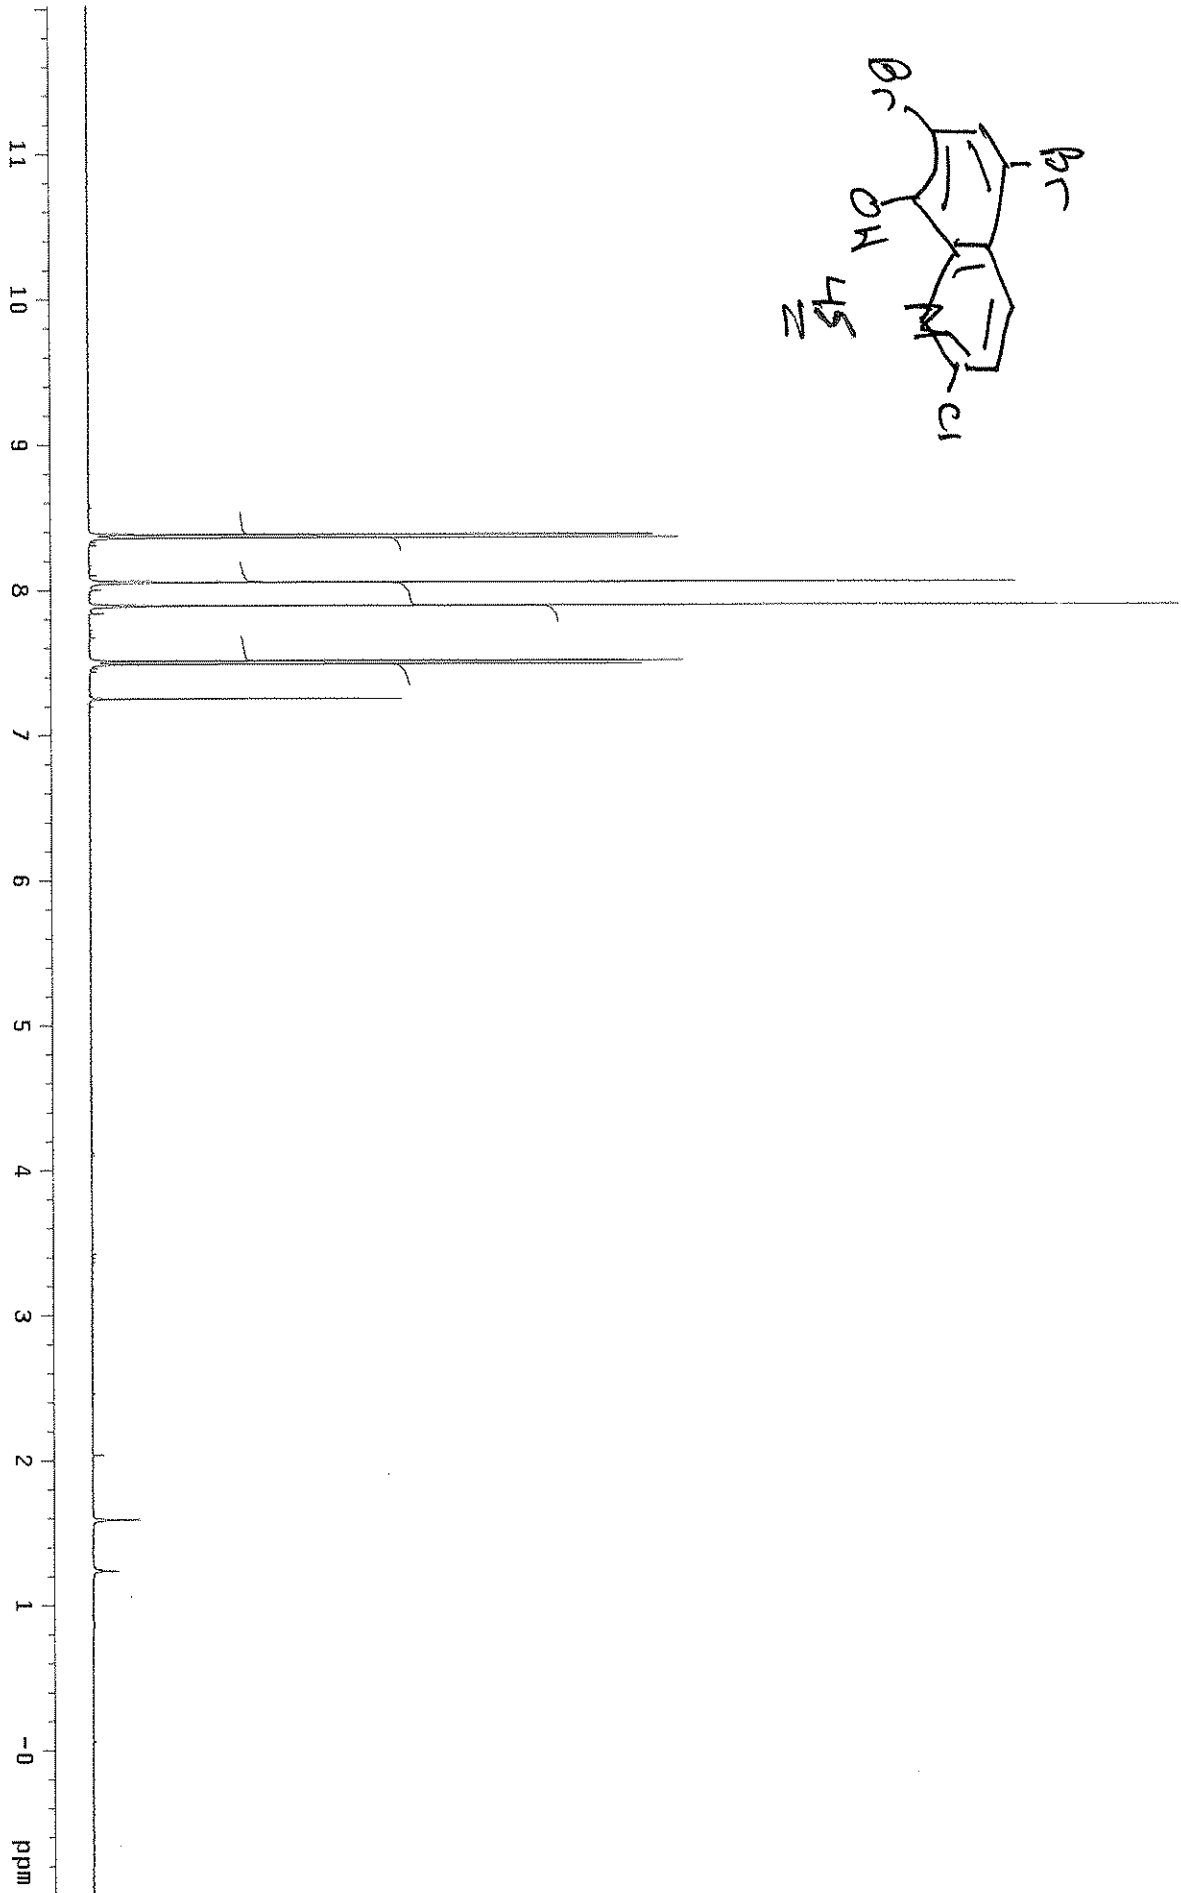

Automation directory: /home/nmruser/Padwa\_A/vnmrsys/data/autoc\_2006.09.06  
File : exp  
Sample id : tmpstudy  
Pulse Sequence: s2pul

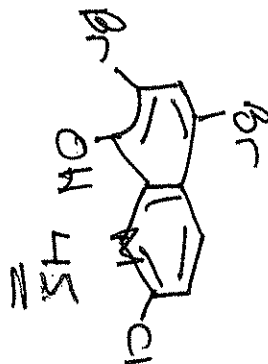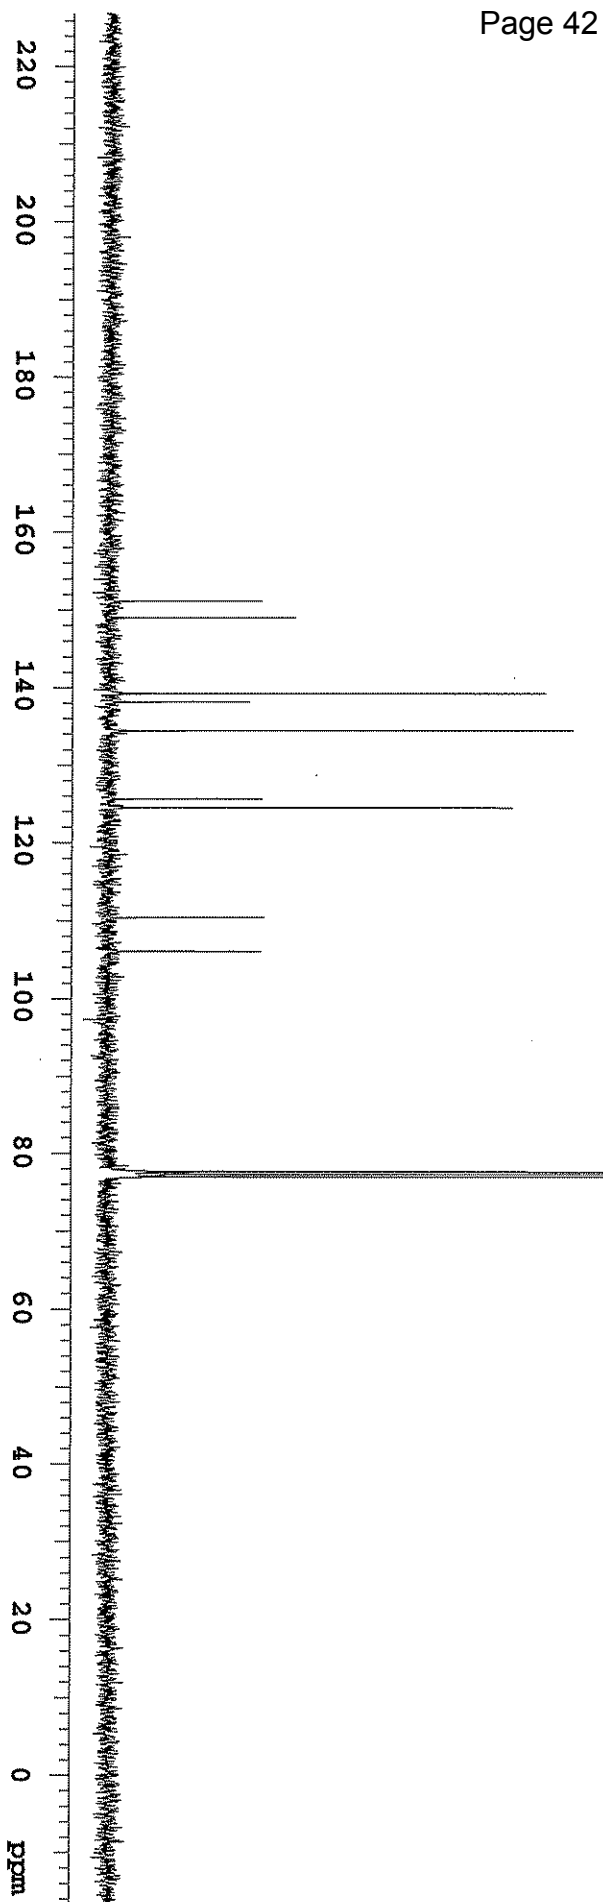

Automation directory: /home/nmruser/Padm\_A/vnmrsys/data/aut0\_2006.09.06  
 File : exp  
 Sample id : tmpstudy  
 Pulse Sequence: s2pul1

Page 43

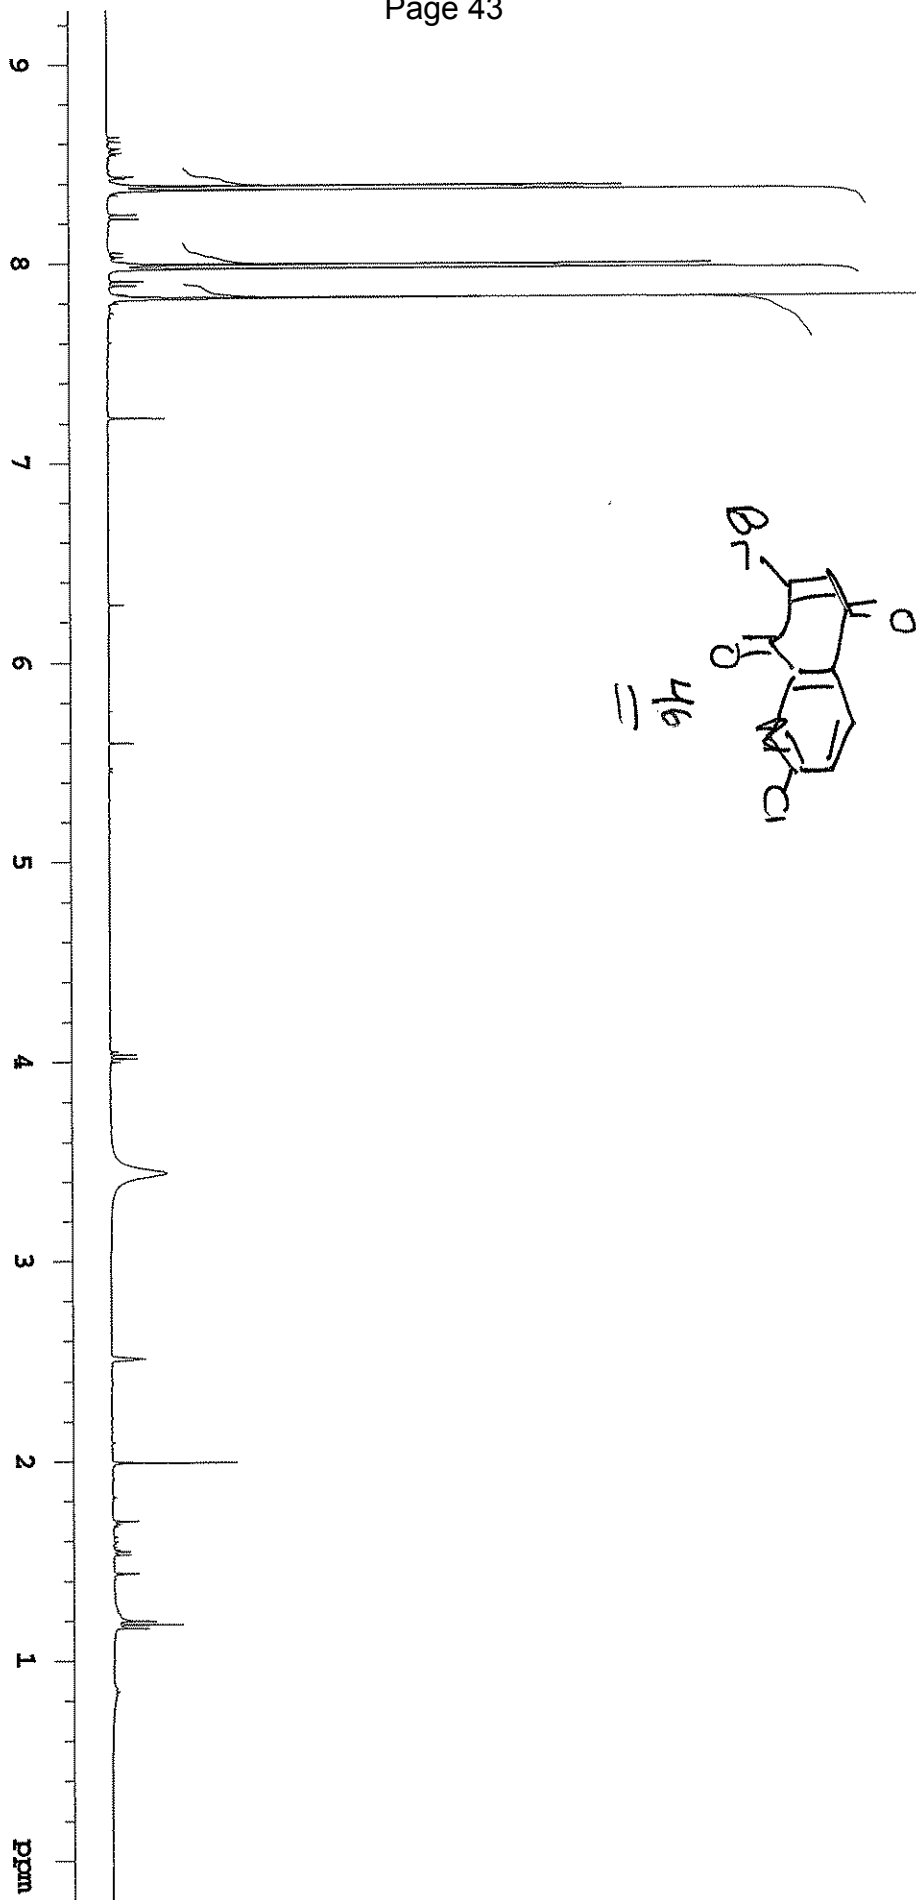

2-61b fc in dmsco-d6

Automation directory: /home/nmruser/Padua\_A/vnmrSYS/data/auto\_2006.09.06  
File : exp  
Sample id : tmpstudy  
Pulse Sequence: s2pu1

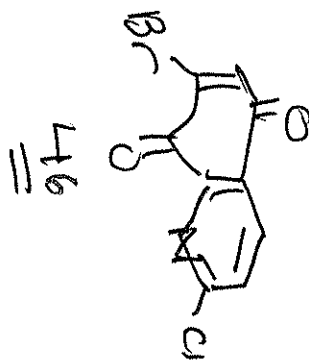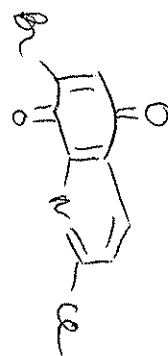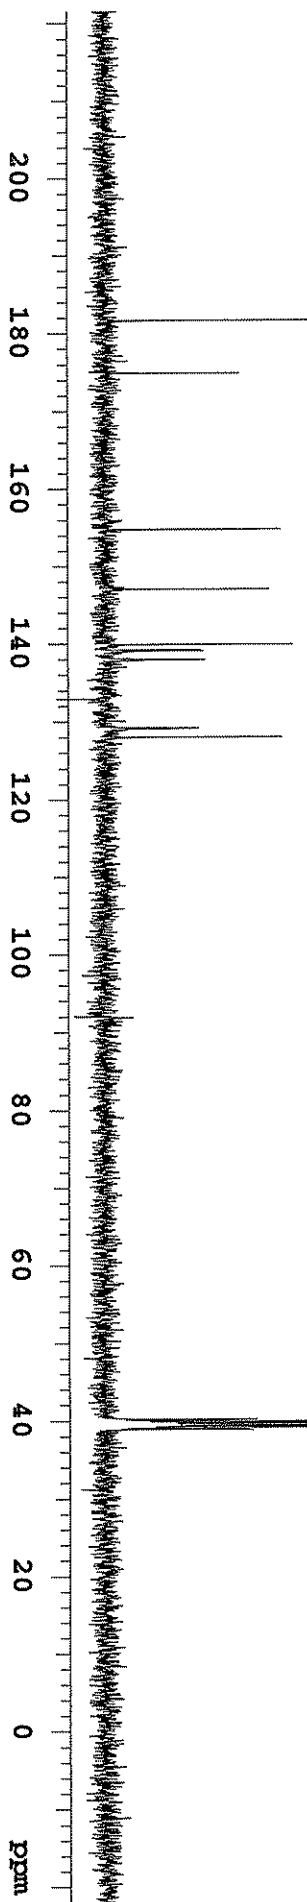

2-957c2  
Pulse Sequence: szpu1

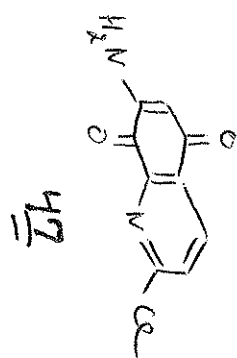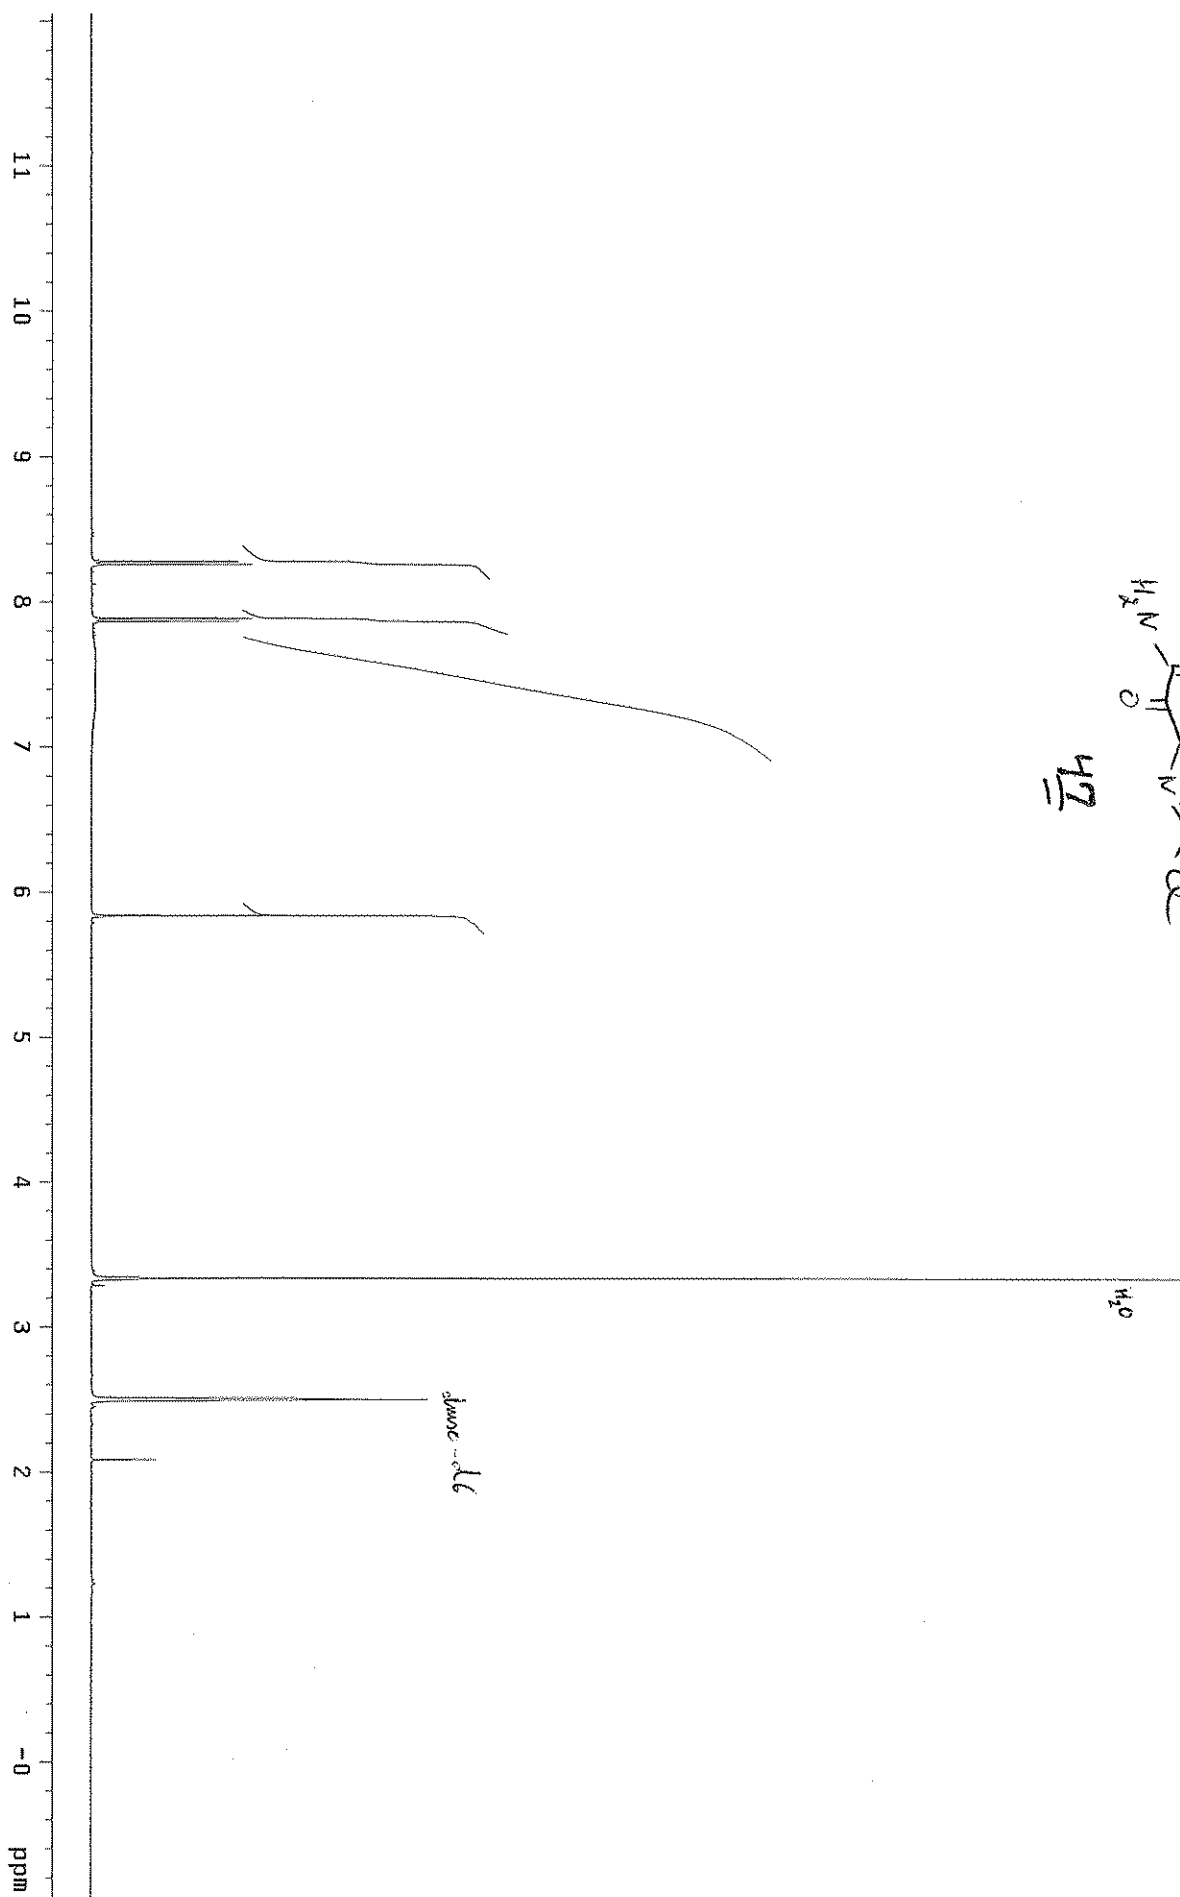

2-95t.c2

Pulse Sequence: szpul

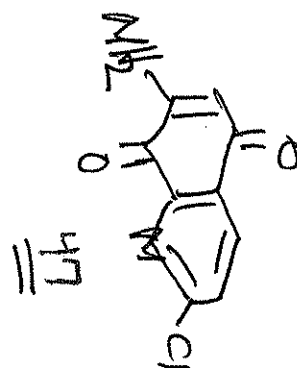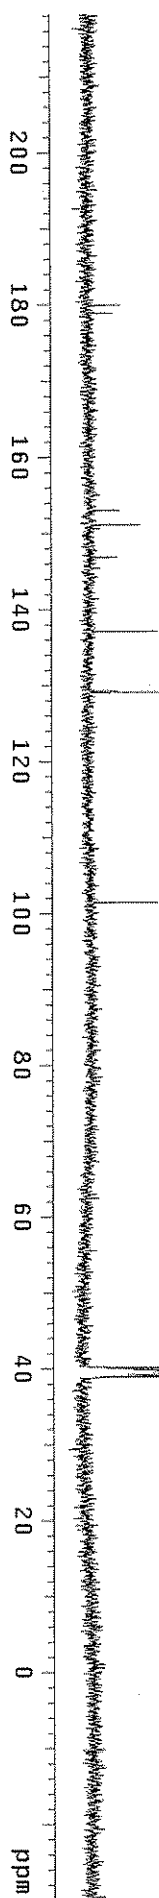

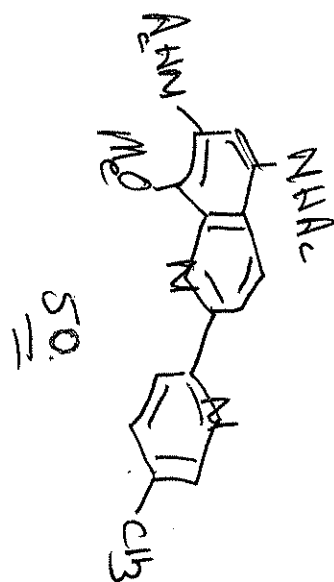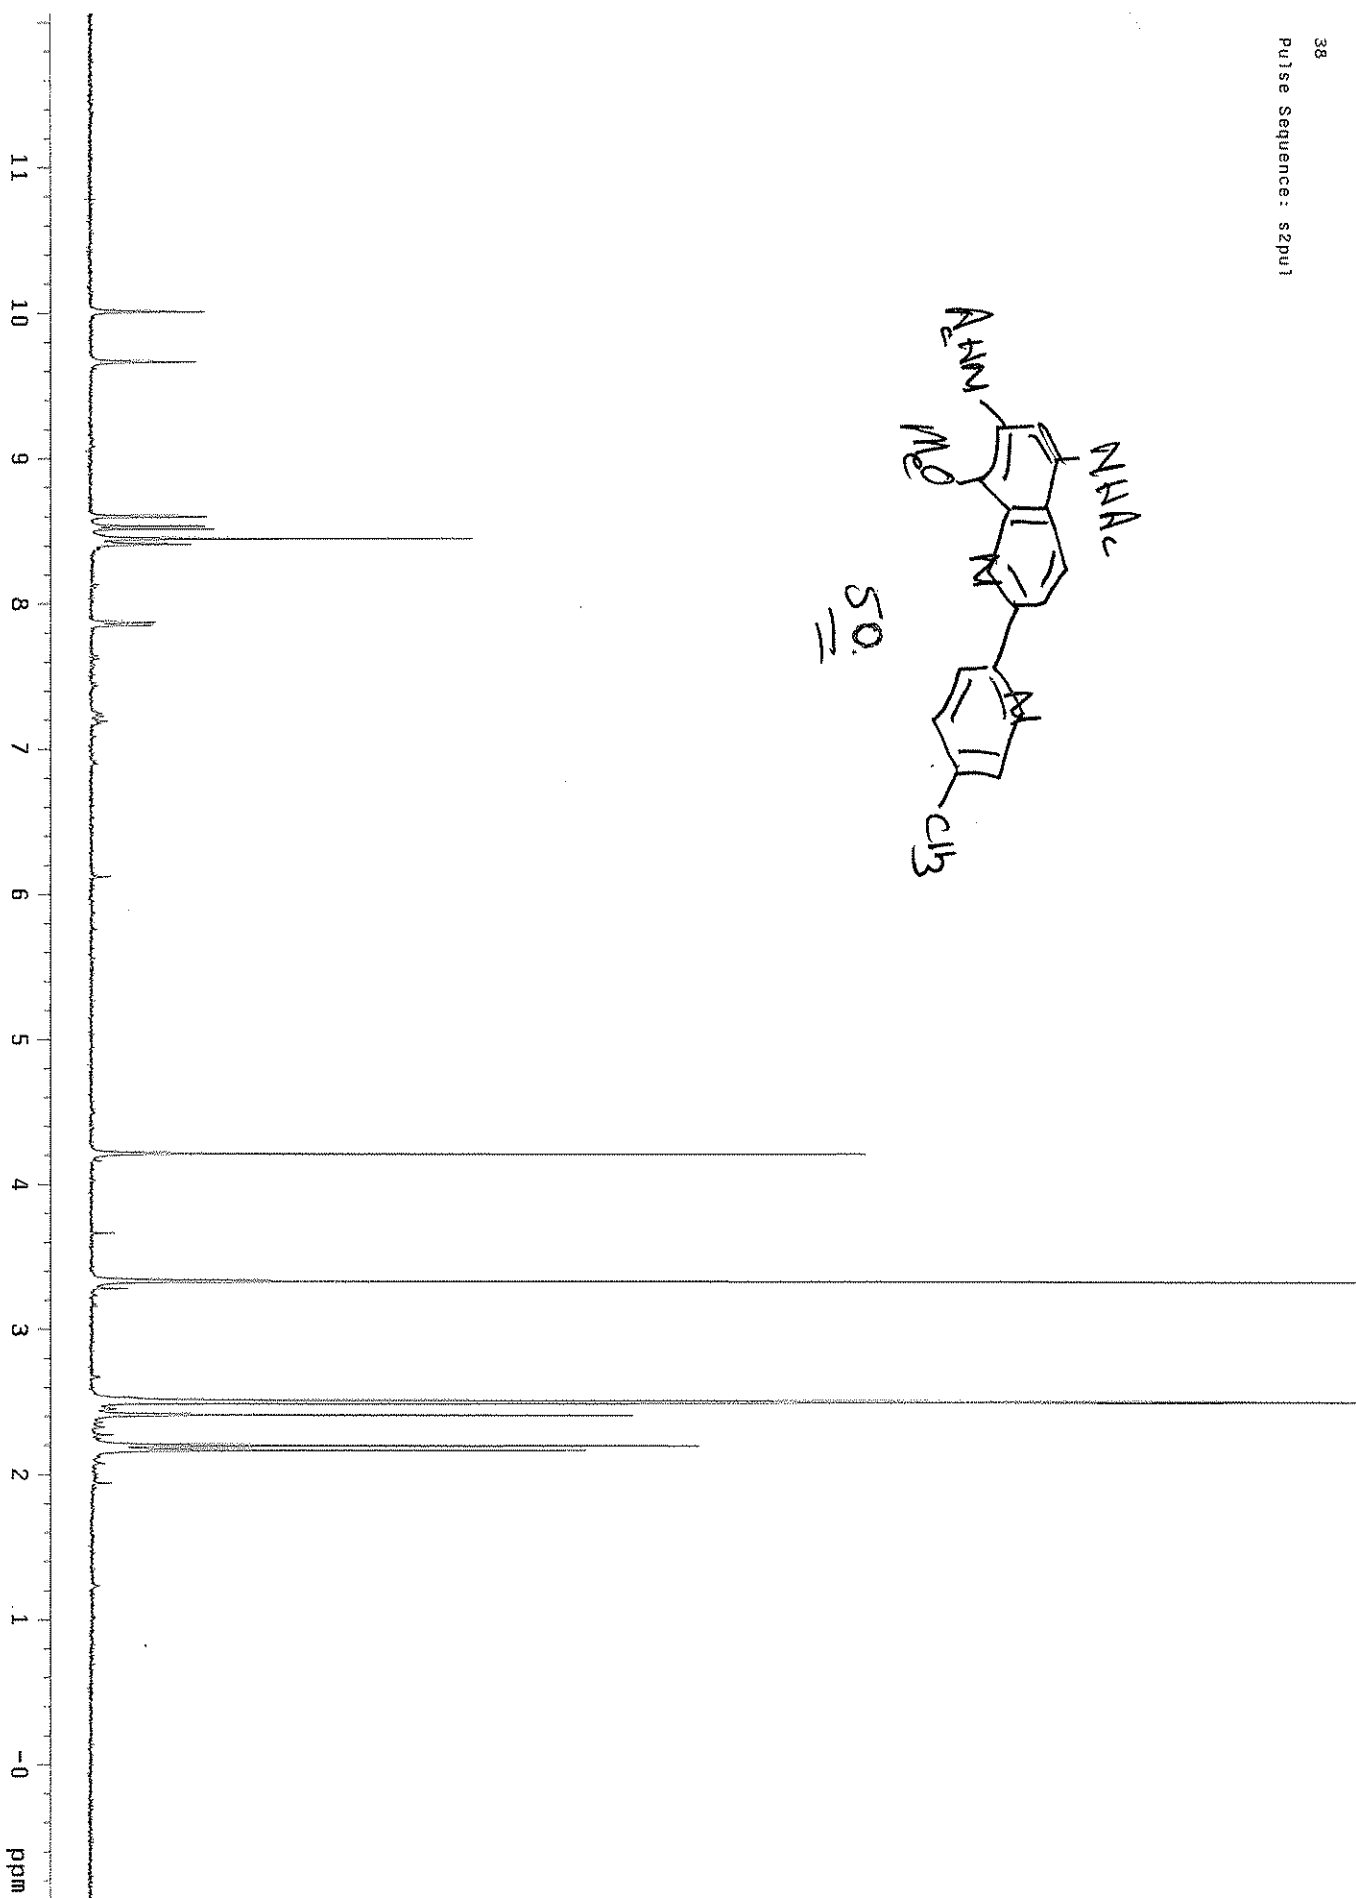

38-C13  
Pulse Sequence: szpu1

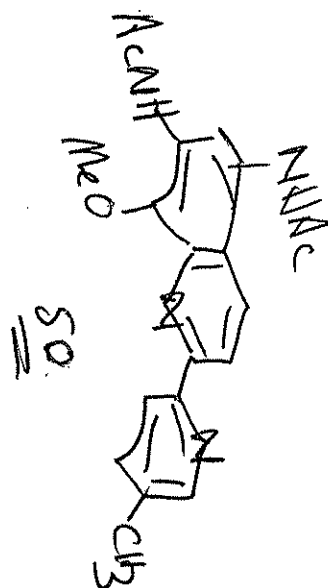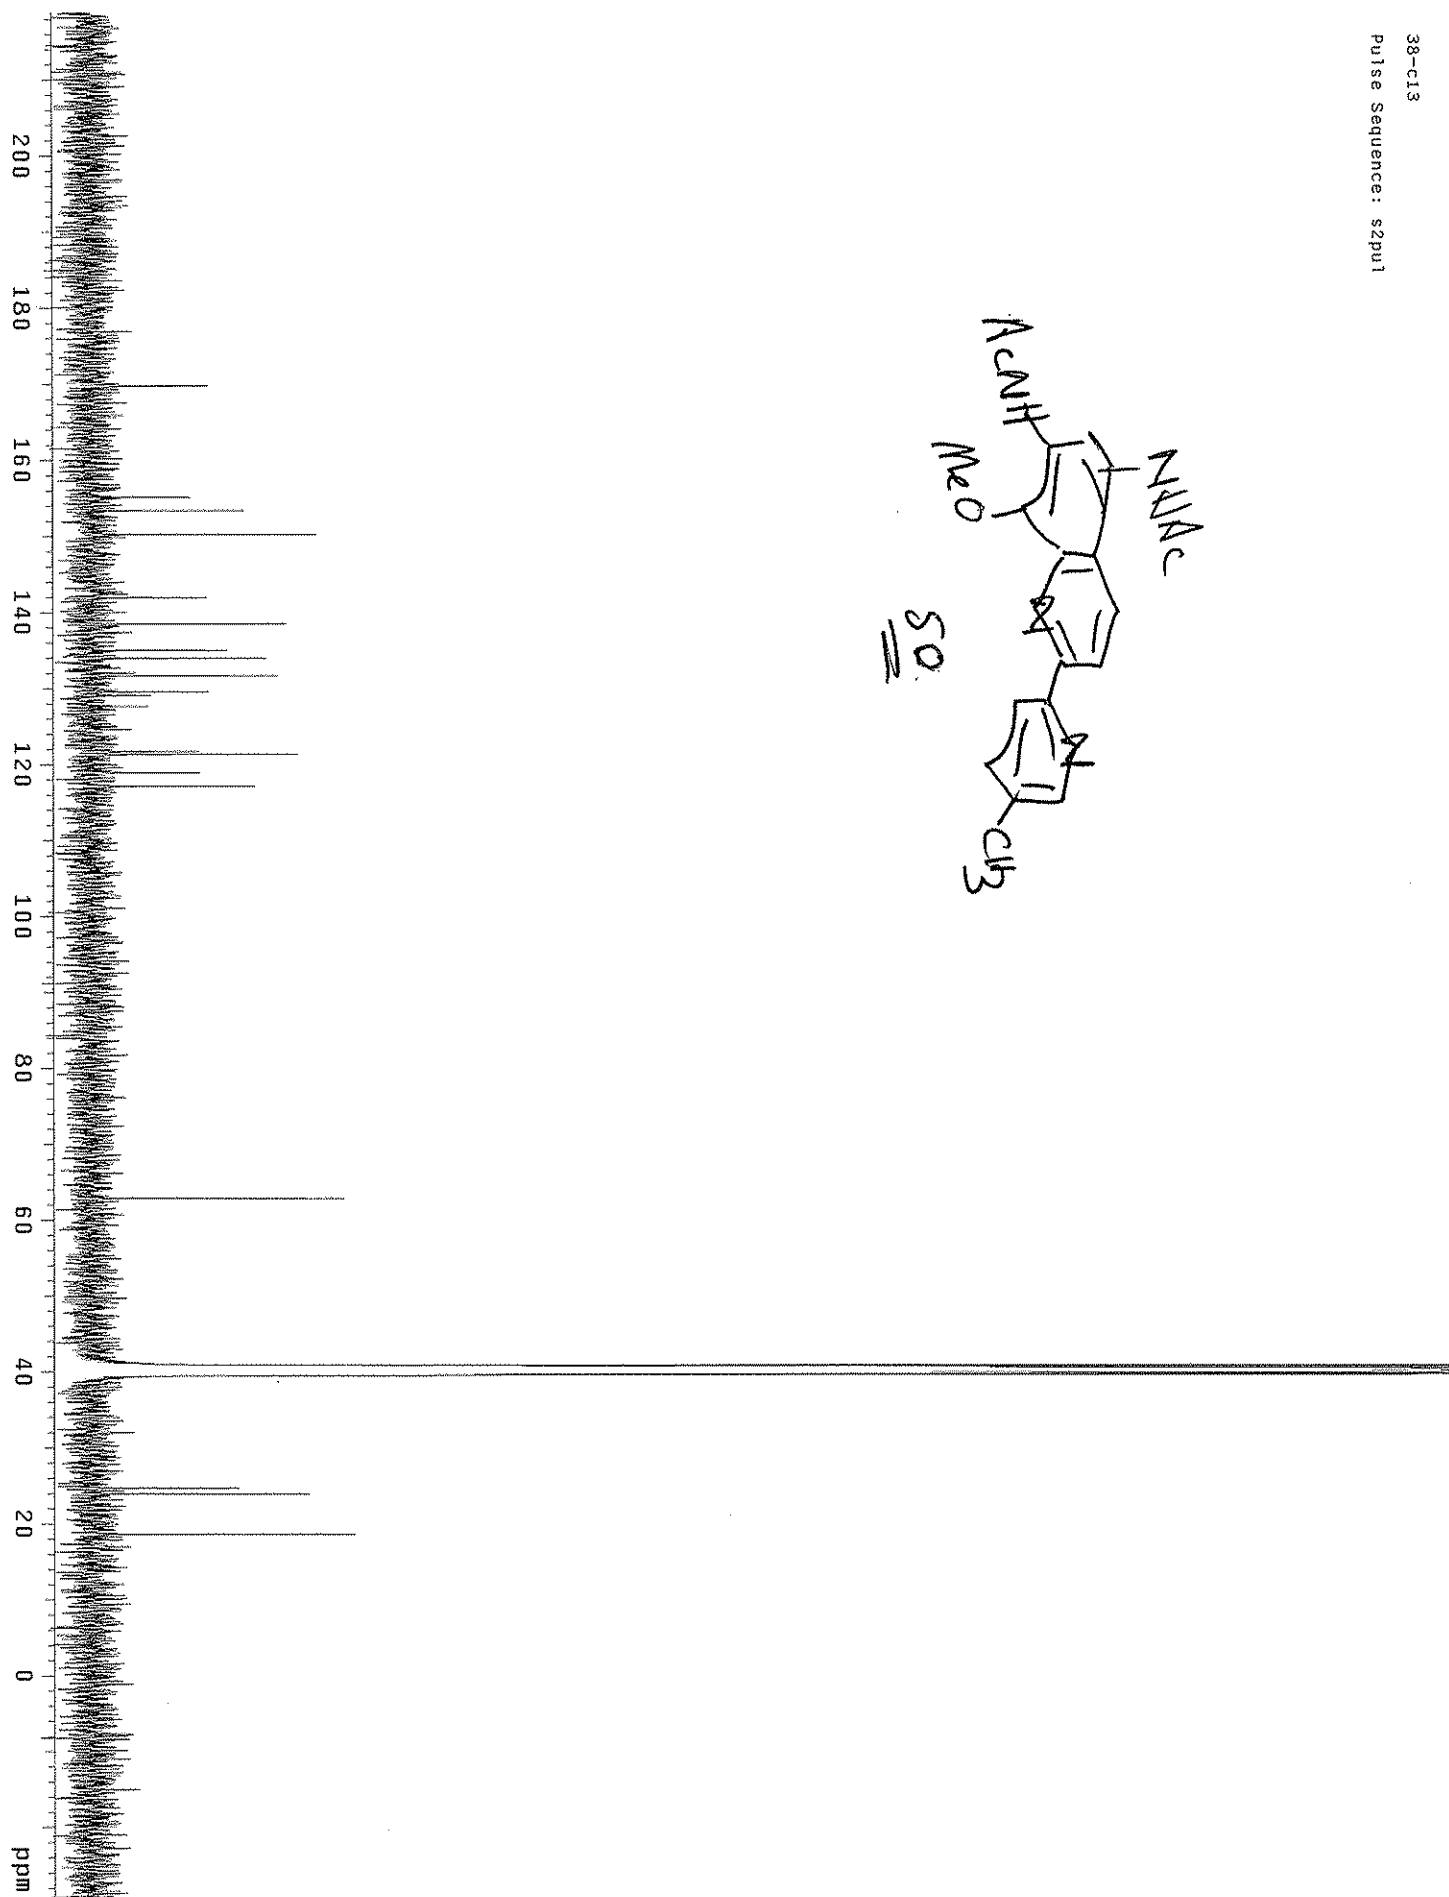



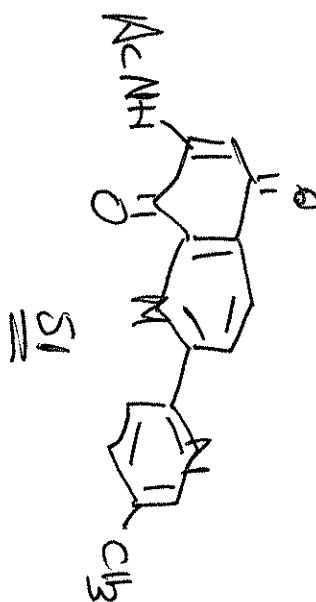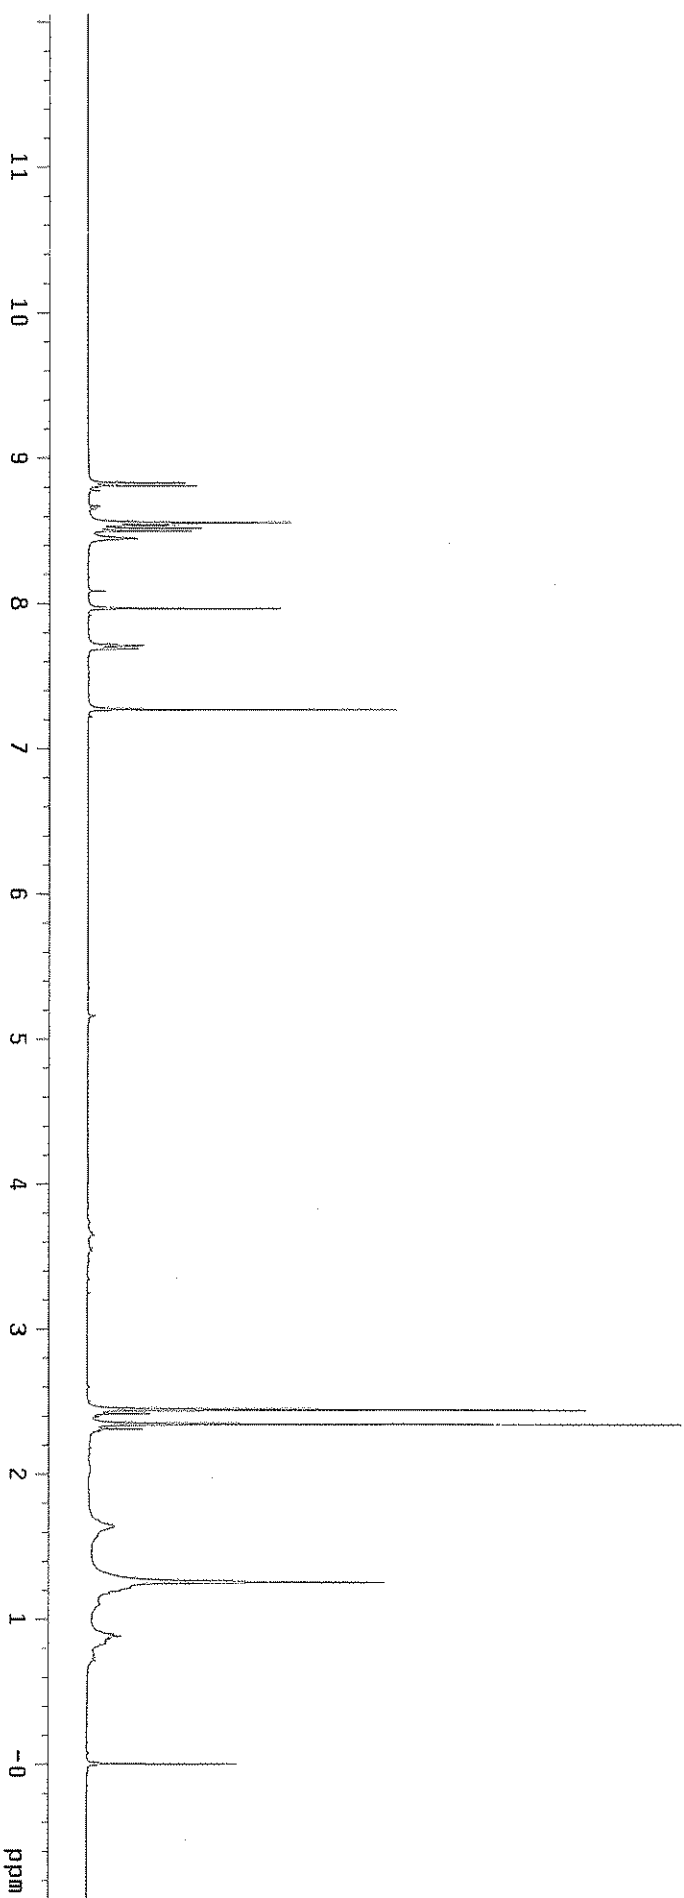

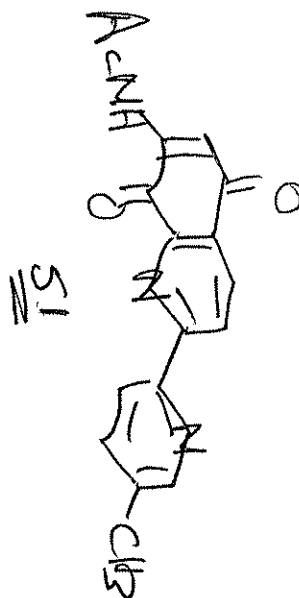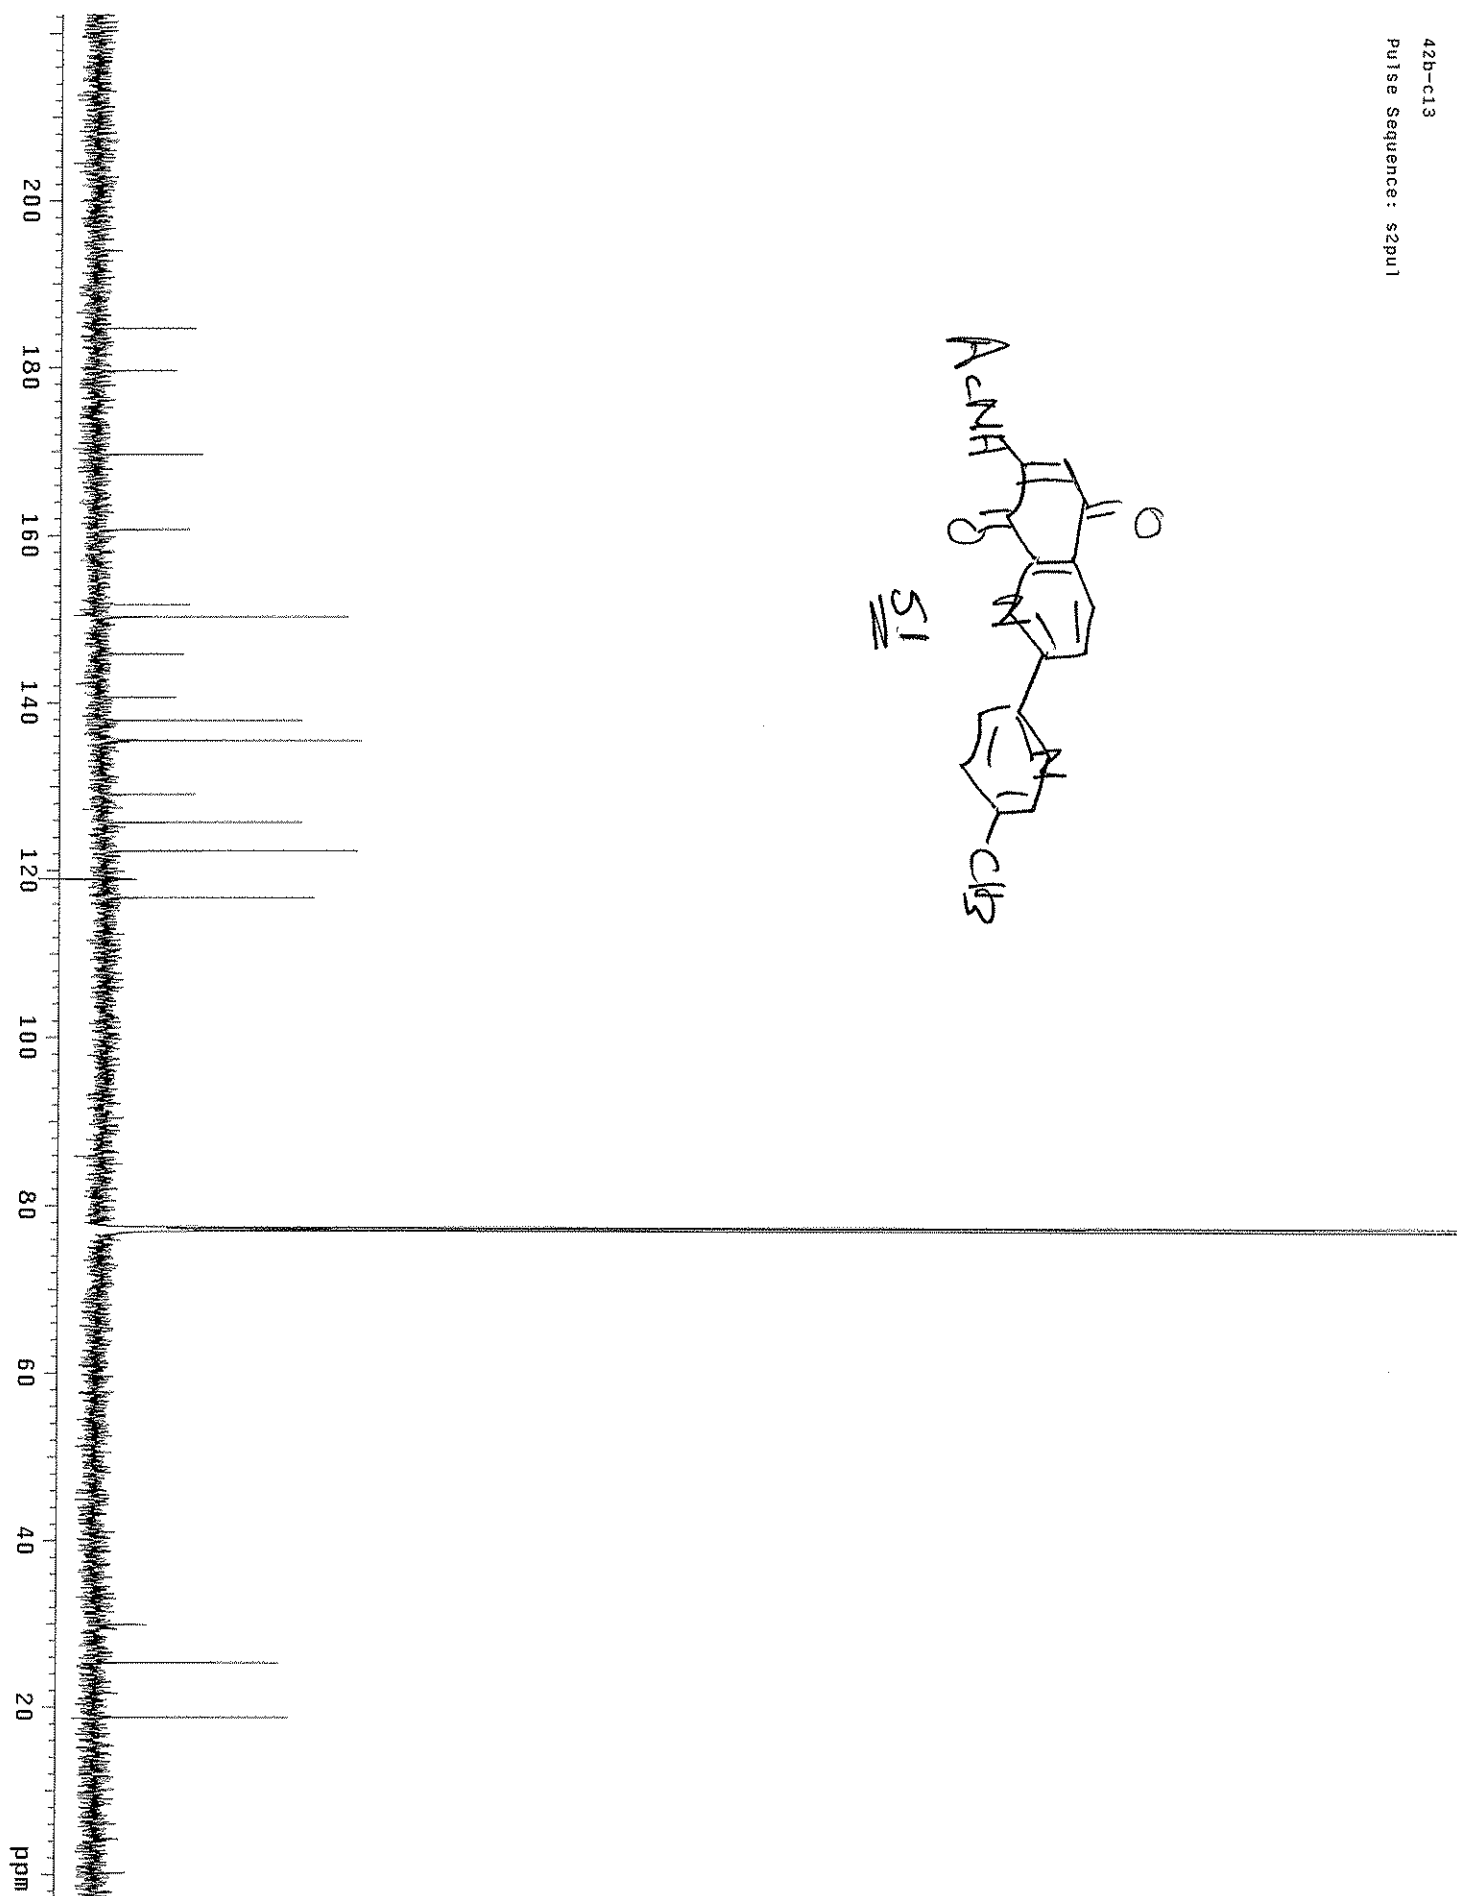

Supplement: Supplementary file 1 [file 4493830]
